# Supplementary material for: Comparative Chemical Profiling and Monacolins Quantification in Red Yeast Rice Dietary Supplements by 1H-NMR and UHPLC-DAD-MS
Source: PubMed Central journal article supplement (PMC7024183; doi:10.3390/molecules25020317), 2020-01-13

## SUPPORTING INFORMATION

# Comparative chemical profiling and monacolins quantification in red yeast rice dietary supplements by $^1\text{H}$ NMR and UHPLC-DAD-MS

Rabab Hachem<sup>1</sup>, Gaëtan Assemat<sup>1</sup>, Stéphane Balayssac<sup>1</sup>, Nathalie Martins-Froment<sup>2</sup>, Véronique Gilard<sup>1</sup>, Robert Martino<sup>1</sup>, Myriam Malet-Martino<sup>1,\*</sup>

<sup>1</sup> Biomedical NMR Group, Laboratoire SPCMIB, UMR CNRS 5068, Université Paul Sabatier, 118 route de Narbonne, 31062 Toulouse Cedex 9, France; [Rabab.Hachem@evotec.com](mailto:Rabab.Hachem@evotec.com) (R.H.); [gaetan-ass@hotmail.fr](mailto:gaetan-ass@hotmail.fr) (G.A.); [balayssac@chimie.ups-tlse.fr](mailto:balayssac@chimie.ups-tlse.fr) (S.B.); [gilard@chimie.ups-tlse.fr](mailto:gilard@chimie.ups-tlse.fr) (V.G.); [rmartino@chimie.ups-tlse.fr](mailto:rmartino@chimie.ups-tlse.fr) (R.M.); [martino@chimie.ups-tlse.fr](mailto:martino@chimie.ups-tlse.fr) (M.M.-M.)

<sup>2</sup> Service commun de spectrométrie de masse, Institut de Chimie de Toulouse, Université Paul Sabatier, 118 route de Narbonne, 31062 Toulouse Cedex 9, France; [martins@chimie.ups-tlse.fr](mailto:martins@chimie.ups-tlse.fr) (N.M.-F.)

\* Correspondence: [martino@chimie.ups-tlse.fr](mailto:martino@chimie.ups-tlse.fr)

**Table S1.**  $^1\text{H}$  and  $^{13}\text{C}$  NMR data (solvent:  $\text{CD}_3\text{CN}:\text{D}_2\text{O}$  80:20) of monacolin K in lactone (MK) and hydroxyl acid (MKA) forms, compactin and dihydromonacolin K.

| Positions        | $\delta$ $^1\text{H}$<br>(ppm) | Multiplicity <sup>1</sup><br>(J (Hz)) | COSY $^1\text{H}$ - $^1\text{H}$ correlations |                          |                          | $\delta$ $^{13}\text{C}$<br>(ppm) | HMBC $^1\text{H}$ - $^{13}\text{C}$ correlations |                          |            |                 |
|------------------|--------------------------------|---------------------------------------|-----------------------------------------------|--------------------------|--------------------------|-----------------------------------|--------------------------------------------------|--------------------------|------------|-----------------|
|                  |                                |                                       | $^2\text{J}_{\text{HH}}$                      | $^3\text{J}_{\text{HH}}$ | $^4\text{J}_{\text{HH}}$ |                                   | $^2\text{J}_{\text{CH}}$                         | $^3\text{J}_{\text{CH}}$ |            |                 |
| Monacolin K (MK) | 5                              | CH                                    | 6.01                                          | d (9.6)                  | -                        | H6                                | H7                                               | 131.0                    | -          | H4/H7           |
|                  | 6                              | CH                                    | 5.84                                          | dd (6.1, 9.6)            | -                        | H5/H7                             | H17                                              | 136.4                    | H7         | H17             |
|                  | 4                              | CH                                    | 5.56                                          | app t (2.8)              | -                        | H3                                | H2/H9/H16                                        | 132.4                    | -          | H2/H9/H5/H16    |
|                  | 1                              | CH                                    | 5.35                                          | q (3.2)                  | -                        | H2/H9                             | -                                                | 71.2                     | H2         | -               |
|                  | 20                             | CH                                    | 4.59                                          | m                        | -                        | H19/H21                           | -                                                | 79.7                     | H19/H21    | -               |
|                  | 22                             | CH                                    | 4.25                                          | app quint (3.9)          | -                        | H21/H23                           | -                                                | 64.6                     | H21/H23    | -               |
|                  | 23                             | CH <sub>2</sub>                       | 2.69                                          | Ad (4.9, 17.6)           | H23                      | H22                               | -                                                | 40.8                     | -          | -               |
|                  |                                |                                       | 2.51                                          | Bdd (1.7, 3.8, 17.6)     | H23                      | H22                               | H21                                              |                          |            |                 |
|                  | 3                              | CH                                    | 2.45                                          | m                        | -                        | H2/H4/H16                         | -                                                | 30.1                     | H2/H4/H16  | H1              |
|                  | 7                              | CH                                    | 2.42                                          | m                        | -                        | H6/H8/H17                         | H5                                               | 33.3                     | H6         | H5/H18          |
|                  | 9                              | CH                                    | 2.37                                          | m                        | -                        | H8/H1                             | H4                                               | 39.7                     | H1         | H2/H4/H5/H7/H18 |
| 12               | CH                             | 2.35                                  | m                                             | -                        | H13/H15                  | -                                 | 44.3                                             | H13/H15                  | H14        |                 |
| 2                | CH <sub>2</sub>                | 1.96                                  | m                                             | -                        | H3/H1                    | -                                 | 35.3                                             | -                        | H4/H16     |                 |
| 21               | CH <sub>2</sub>                | 1.90                                  | m                                             | H21                      | H20/H22                  | -                                 | 37.9                                             | -                        | H19/H23    |                 |
|                  |                                | 1.71                                  | m                                             | H21                      | H20/H22                  | H23                               |                                                  |                          |            |                 |
| 8                | CH                             | 1.69                                  | m                                             | -                        | H9/H7/H18                | -                                 | 39.4                                             | H9/H7/H18                | H6         |                 |
| 13               | CH <sub>2</sub>                | 1.62                                  | app qd (7.4, 13.6)                            | H13                      | H12/H14                  | -                                 | 29.5                                             | H12/H14                  | H15        |                 |
|                  |                                | 1.46                                  | m                                             | H13                      | H12/H14                  | -                                 |                                                  |                          |            |                 |
| 19               | CH <sub>2</sub>                | 1.81                                  | m                                             | H19                      | H18/H20                  | -                                 | 35.0                                             | H18                      | -          |                 |
|                  |                                | 1.37                                  | m                                             | H19                      | H18/H20                  | -                                 |                                                  |                          |            |                 |
| 18               | CH <sub>2</sub>                | 1.46                                  | m                                             | -                        | H8/H19                   | -                                 | 26.5                                             | H19                      | -          |                 |
|                  |                                | 1.36                                  | m                                             | -                        | H8/H19                   | -                                 |                                                  |                          |            |                 |
| 15               | CH <sub>3</sub>                | 1.08                                  | d (6.9)                                       | -                        | H12                      | -                                 | 18.5                                             | H12                      | H13        |                 |
| 16               | CH <sub>3</sub>                | 1.06                                  | d (7.4)                                       | -                        | H3                       | -                                 | 25.0                                             | -                        | H2         |                 |
| 17               | CH <sub>3</sub>                | 0.89                                  | d (6.9)                                       | -                        | H7                       | -                                 | 15.9                                             | H7                       | -          |                 |
| 14               | CH <sub>3</sub>                | 0.88                                  | t (7.5)                                       | -                        | H13                      | -                                 | 14.0                                             | H13                      | H12        |                 |
| 10               | Cq                             | -                                     | -                                             | -                        | -                        | -                                 | 134.7                                            | H9/H5                    | H6/H1      |                 |
| 24               | Cq                             | -                                     | -                                             | -                        | -                        | -                                 | 175.1                                            | H23                      | -          |                 |
| 11               | Cq                             | -                                     | -                                             | -                        | -                        | -                                 | 180.1                                            | H12                      | H13/H15/H1 |                 |

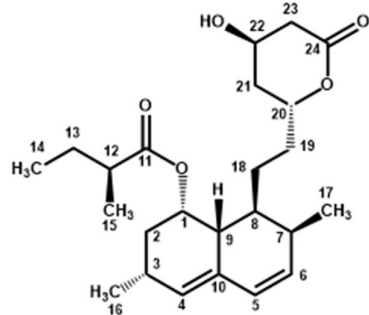

|                                         | Positions       |                 | $\delta$ <sup>1</sup> H<br>(ppm) | Multiplicity <sup>1</sup><br>(J (Hz)) | COSY <sup>1</sup> H- <sup>1</sup> H correlations |                              |                              | $\delta$ <sup>13</sup> C<br>(ppm) | HMBC <sup>1</sup> H- <sup>13</sup> C correlations |                              |
|-----------------------------------------|-----------------|-----------------|----------------------------------|---------------------------------------|--------------------------------------------------|------------------------------|------------------------------|-----------------------------------|---------------------------------------------------|------------------------------|
|                                         |                 |                 |                                  |                                       | <sup>2</sup> J <sub>HH</sub>                     | <sup>3</sup> J <sub>HH</sub> | <sup>4</sup> J <sub>HH</sub> |                                   | <sup>2</sup> J <sub>CH</sub>                      | <sup>3</sup> J <sub>CH</sub> |
| Monacolin K hydroxyl acid form<br>(MKA) | 5               | CH              | 5.99                             | d (9.6)                               | -                                                | H6                           | H7                           | 130.9                             | -                                                 | H4/H7                        |
|                                         | 6               | CH              | 5.83                             | dd (6.1, 9.6)                         | -                                                | H5/H7                        | H17                          | 136.9                             | H7                                                | H17                          |
|                                         | 4               | CH              | 5.53                             | app t (2.8)                           | -                                                | H3                           | H2/H9/H16                    | 132.2                             | -                                                 | H2/H9/H5/H16                 |
|                                         | 1               | CH              | 5.33                             | q (3.2)                               | -                                                | H2/H9                        | -                            | 71.6                              | H2                                                | -                            |
|                                         | 20              | CH              | 3.63                             | app hept (4.1)                        | -                                                | H19/H21                      | -                            | 73.3                              | H21                                               | H18                          |
|                                         | 22              | CH              | 4.05                             | m                                     | -                                                | H21/H23                      | -                            | 70.7                              | H21/H23                                           | -                            |
|                                         | 23              | CH <sub>2</sub> | 2.33                             | m                                     | H23                                              | H22                          | -                            | 46.6                              | -                                                 | -                            |
|                                         |                 |                 | 2.16                             | dd (8.7, 15.2)                        | H23                                              | H22                          | -                            |                                   |                                                   |                              |
|                                         | 3               | CH              | 2.42                             | m                                     | -                                                | H2/H4/H16                    | -                            | 30.2                              | H2/H4/H16                                         | H1                           |
|                                         | 7               | CH              | 2.39                             | m                                     | -                                                | H6/H8/H17                    | H5                           | 33.4                              | H6                                                | H5/H18                       |
|                                         | 9               | CH              | 2.35                             | m                                     | -                                                | H8/H1                        | H4                           | 39.7                              | H1                                                | H2/H4/H5/H7/H18              |
|                                         | 12              | CH              | 2.33                             | m                                     | -                                                | H13/H15                      | -                            | 44.5                              | H13/H15                                           | H14                          |
|                                         | 2               | CH <sub>2</sub> | 1.93                             | m                                     | -                                                | H3/H1                        | -                            | 35.0                              | -                                                 | H4/H16                       |
|                                         | 21              | CH <sub>2</sub> | 1.57                             | m                                     | H21                                              | H20/H22                      | -                            | 46.3                              | -                                                 | H19/H23                      |
|                                         |                 |                 | 1.51                             | m                                     | H21                                              | H20/H22                      | -                            |                                   |                                                   |                              |
|                                         | 8               | CH              | 1.63                             | m                                     | -                                                | H9/H7/H18                    | -                            | 39.7                              | H9/H7/H18                                         | H6                           |
|                                         | 13              | CH <sub>2</sub> | 1.59                             | m                                     | H13                                              | H12/H14                      | -                            | 29.6                              | H12/H14                                           | H15                          |
|                                         |                 |                 | 1.45                             | m                                     | H13                                              | H12/H14                      | -                            |                                   |                                                   |                              |
| 19                                      | CH <sub>2</sub> | 1.53            | m                                | H19                                   | H18/H20                                          | -                            | 37.2                         | H18                               | -                                                 |                              |
|                                         |                 | 1.15            | m                                | H19                                   | H18/H20                                          | -                            |                              |                                   |                                                   |                              |
| 18                                      | CH <sub>2</sub> | 1.32            | m                                | -                                     | H8/H19                                           | -                            | 27.3                         | H19                               | -                                                 |                              |
|                                         |                 | -               | -                                | -                                     | H8/H19                                           | -                            |                              |                                   |                                                   |                              |
| 15                                      | CH <sub>3</sub> | 1.08            | d (6.9)                          | -                                     | H12                                              | -                            | 18.7                         | H12                               | H13                                               |                              |
| 16                                      | CH <sub>3</sub> | 1.05            | d (7.4)                          | -                                     | H3                                               | -                            | 25.1                         | -                                 | H2                                                |                              |
| 17                                      | CH <sub>3</sub> | 0.87            | d (6.9)                          | -                                     | H7                                               | -                            | 16.1                         | H7                                | -                                                 |                              |
| 14                                      | CH <sub>3</sub> | 0.86            | t (7.4)                          | -                                     | H13                                              | -                            | 14.1                         | H13                               | H12                                               |                              |
| 10                                      | C <sub>q</sub>  | -               | -                                | -                                     | -                                                | -                            | 135.0                        | H9/H5                             | H6/H1                                             |                              |
| 24                                      | C <sub>q</sub>  | -               | -                                | -                                     | -                                                | -                            | 181.5                        | H23                               | -                                                 |                              |
| 11                                      | C <sub>q</sub>  | -               | -                                | -                                     | -                                                | -                            | 180.9                        | H12                               | H13/H15/H1                                        |                              |

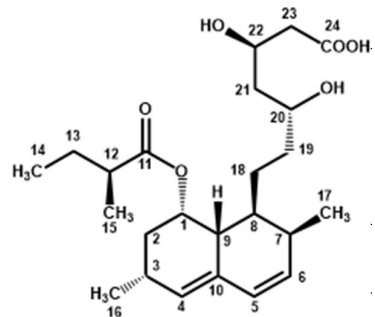

| Positions          | $\delta$ <sup>1</sup> H (ppm) | Multiplicity <sup>1</sup> (J (Hz)) | COSY <sup>1</sup> H- <sup>1</sup> H correlations |                              |                              | $\delta$ <sup>13</sup> C (ppm) | HMBC <sup>1</sup> H- <sup>13</sup> C correlations |                              |
|--------------------|-------------------------------|------------------------------------|--------------------------------------------------|------------------------------|------------------------------|--------------------------------|---------------------------------------------------|------------------------------|
|                    |                               |                                    | <sup>2</sup> J <sub>HH</sub>                     | <sup>3</sup> J <sub>HH</sub> | <sup>4</sup> J <sub>HH</sub> |                                | <sup>2</sup> J <sub>CH</sub>                      | <sup>3</sup> J <sub>CH</sub> |
| 5 CH               | 6.00                          | d (9.7)                            | -                                                | H6                           | H7                           | 130.8                          | -                                                 | H4/H7                        |
| 6 CH               | 5.79                          | dd (6.0, 9.7)                      | -                                                | H5/H7                        | -                            | 135.9                          | H7                                                | H17                          |
| 4 CH               | 5.57                          | m                                  | -                                                | H3                           | H9                           | 126.5                          | -                                                 | H2/H5/H9                     |
| 1 CH               | 5.30                          | m                                  | -                                                | H2/H9                        | -                            | 70.8                           | -                                                 | H3                           |
| 20 CH              | 4.60                          | m                                  | -                                                | H19/H21                      | -                            | 79.7                           | H19                                               | H18/H22                      |
| 22 CH              | 4.25                          | app quint (3.9)                    | -                                                | H21/H23                      | -                            | 64.6                           | H21/H23                                           | H20                          |
| 23 CH <sub>2</sub> | 2.69                          | Ad (4.8, 17.6)                     | H23                                              | H22                          | -                            | 40.7                           | -                                                 | H21                          |
|                    | 2.51                          | Bdd (1.7, 3.6, 17.6)               | H23                                              | H22                          | -                            |                                |                                                   |                              |
| 3 CH <sub>2</sub>  | 2.15                          | m                                  | -                                                | H2/H4                        | -                            | 23.4                           | H2/H4                                             | H1                           |
| 7 CH               | 2.42                          | m                                  | -                                                | H6/H8/H17                    | H5                           | 33.5                           | H6/H17                                            | H5/H18                       |
| 9 CH               | 2.42                          | m                                  | -                                                | H8/H1                        | H4                           | 39.8                           | H1                                                | H2/H4/H5/H7/H18              |
| 12 CH              | 2.38                          | m                                  | -                                                | H13/H15                      | -                            | 44.5                           | H13/H15                                           | H14                          |
| 2 CH <sub>2</sub>  | 2.08                          | m                                  | -                                                | H3/H1                        | -                            | 28.6                           | -                                                 | H4                           |
|                    | 1.72                          | m                                  | -                                                | H3/H1                        | -                            |                                |                                                   |                              |
| 21 CH <sub>2</sub> | 1.90                          | m                                  | H21                                              | H20/H22                      | -                            | 37.9                           | -                                                 | H19/H23                      |
|                    | 1.72                          | m                                  | H21                                              | H20/H22                      | -                            |                                |                                                   |                              |
| 8 CH               | 1.68                          | m                                  | -                                                | H9/H7                        | -                            | 39.6                           | H7/H9/H18                                         | H6                           |
| 13 CH <sub>2</sub> | 1.62                          | app qd (7.6, 13.6)                 | H13                                              | H12/H14                      | -                            | 29.5                           | H12/H14                                           | H15                          |
|                    | 1.46                          | m                                  | H13                                              | H12/H14                      | -                            |                                |                                                   |                              |
| 19 CH <sub>2</sub> | 1.81                          | m                                  | H19                                              | H18/H20                      | -                            | 35.2                           | H18                                               | -                            |
|                    | 1.37                          | m                                  | H19                                              | H18/H20                      | -                            |                                |                                                   |                              |
| 18 CH <sub>2</sub> | 1.48                          | m                                  | -                                                | H19                          | -                            | 26.3                           | H19                                               | -                            |
|                    | 1.39                          | m                                  | -                                                | H19                          | -                            |                                |                                                   |                              |
| 15 CH <sub>3</sub> | 1.11                          | d (7.0)                            | -                                                | H12                          | -                            | 19.1                           | H12                                               | H13                          |
| 17 CH <sub>3</sub> | 0.90                          | d (7.0)                            | -                                                | H7                           | -                            | 15.9                           | H7                                                | -                            |
| 14 CH <sub>3</sub> | 0.89                          | t (7.5)                            | -                                                | H13                          | -                            | 14.0                           | H13                                               | H12                          |
| 10 C <sub>q</sub>  | -                             | -                                  | -                                                | -                            | -                            | 136.7                          | H5/H9                                             | H1/H3/H6                     |
| 24 C <sub>q</sub>  | -                             | -                                  | -                                                | -                            | -                            | 174.2                          | H23                                               | -                            |
| 11 C <sub>q</sub>  | -                             | -                                  | -                                                | -                            | -                            | 179.2                          | H12                                               | H1/H13/H15                   |

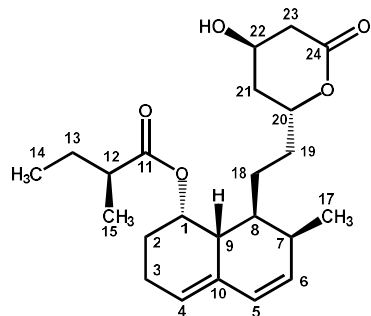

| Positions          |  | $\delta$ <sup>1</sup> H (ppm) | Multiplicity <sup>1</sup> (J (Hz)) | COSY <sup>1</sup> H- <sup>1</sup> H correlations |                              |                              | $\delta$ <sup>13</sup> C (ppm) | HMBC <sup>1</sup> H- <sup>13</sup> C correlations |                              |
|--------------------|--|-------------------------------|------------------------------------|--------------------------------------------------|------------------------------|------------------------------|--------------------------------|---------------------------------------------------|------------------------------|
|                    |  |                               |                                    | <sup>2</sup> J <sub>HH</sub>                     | <sup>3</sup> J <sub>HH</sub> | <sup>4</sup> J <sub>HH</sub> |                                | <sup>2</sup> J <sub>CH</sub>                      | <sup>3</sup> J <sub>CH</sub> |
| 5 CH               |  | 5.42                          | d (9.8)                            | -                                                | H6                           | H7                           | 133.8                          | H10                                               | H4/H7                        |
| 6 CH               |  | 5.69                          | ddd (2.7, 5.0, 9.8)                | -                                                | H5/H7                        | -                            | 135.6                          | H7                                                | H17                          |
| 1 CH               |  | 5.15                          | q (2.7)                            | -                                                | H2/H9                        | -                            | 73.1                           | H2                                                | H3                           |
| 20 CH              |  | 4.58                          | m                                  | -                                                | H19/H21                      | -                            | 79.7                           | H19/H21                                           | -                            |
| 22 CH              |  | 4.25                          | app quint (3.8)                    | -                                                | H21/H23                      | -                            | 64.6                           | H21/H23                                           | -                            |
| 23 CH <sub>2</sub> |  | 2.68                          | Ad (4.9, 17.7)                     | H23                                              | H22                          | -                            | 40.7                           | -                                                 | -                            |
|                    |  | 2.50                          | Bdd (1.7, 3.7, 17.7)               | H23                                              | H22                          | H21                          |                                |                                                   |                              |
| 3 CH               |  | 2.05                          | m                                  | -                                                | H4/H16                       | -                            | 29.5                           | H2/H4/H16                                         | H1                           |
| 7 CH               |  | 2.34                          | m                                  | -                                                | H6/H8/H17                    | H5                           | 33.9                           | H6                                                | H5/H18                       |
| 9 CH               |  | 1.30                          | m                                  | -                                                | H8/H1                        | H4                           | 44.3                           | H1                                                | H2/H4/H5/H7/H18              |
| 10 CH              |  | 2.46                          | m                                  | -                                                | H4/H5/H9                     | -                            | 33.7                           | H5                                                | H1/H3/H6                     |
| 12 CH              |  | 2.39                          | m                                  | -                                                | H13/H15                      | -                            | 44.6                           | H13/H15                                           | H14                          |
| 2 CH <sub>2</sub>  |  | 1.80                          | m                                  | -                                                | H3/H1                        | -                            | 38.0                           | -                                                 | H4/H16                       |
| 4 CH <sub>2</sub>  |  | 1.61                          | m                                  | H4                                               | H10                          | -                            | 41.1                           | -                                                 | H16                          |
|                    |  | 1.35                          | m                                  | H4                                               | H10                          | -                            |                                |                                                   |                              |
| 21 CH <sub>2</sub> |  | 1.88                          | m                                  | H21                                              | H20/H22                      | -                            | 37.8                           | -                                                 | H19/H23                      |
|                    |  | 1.72                          | m                                  | H21                                              | H20/H22                      | H23                          |                                |                                                   |                              |
| 8 CH               |  | 1.66                          | m                                  | -                                                | H9/H7                        | -                            | 40.2                           | H9/H18                                            | H6                           |
| 13 CH <sub>2</sub> |  | 1.64                          | m                                  | H13                                              | H12/H14                      | -                            | 29.3                           | H12/H14                                           | H15                          |
|                    |  | 1.49                          | app qd (7.4, 13.6)                 | H13                                              | H12/H14                      | -                            |                                |                                                   |                              |
| 19 CH <sub>2</sub> |  | 1.81                          | m                                  | H19                                              | H18/H20                      | -                            | 35.3                           | H18                                               | -                            |
|                    |  | 1.37                          | m                                  | H19                                              | H18/H20                      | -                            |                                |                                                   |                              |
| 18 CH <sub>2</sub> |  | 1.35                          | m                                  | -                                                | H8/H19                       | -                            | 25.4                           | H19                                               | -                            |
|                    |  | 1.30                          | m                                  | -                                                | H8/H19                       | -                            |                                |                                                   |                              |
| 15 CH <sub>3</sub> |  | 1.12                          | d (7.0)                            | -                                                | H12                          | -                            | 18.8                           | H12                                               | H13                          |
| 16 CH <sub>3</sub> |  | 1.11                          | d (7.6)                            | -                                                | H3                           | -                            | 23.3                           | -                                                 | H2/H4                        |
| 17 CH <sub>3</sub> |  | 0.86                          | d (7.0)                            | -                                                | H7                           | -                            | 17.0                           | H7                                                | -                            |
| 14 CH <sub>3</sub> |  | 0.90                          | t (7.5)                            | -                                                | H13                          | -                            | 14.0                           | H13                                               | H12                          |
| 24 C <sub>q</sub>  |  | -                             | -                                  | -                                                | -                            | -                            | 175.2                          | H23                                               | -                            |
| 11 C <sub>q</sub>  |  | -                             | -                                  | -                                                | -                            | -                            | 179.9                          | H12                                               | H13/H15/H1                   |

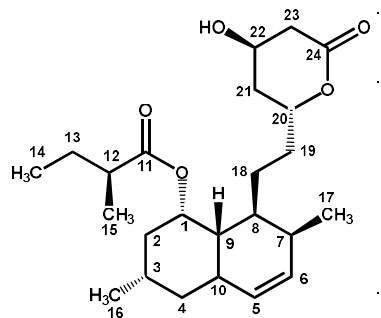

<sup>1</sup>d: doublet, dd: doublet of doublet, ddd: doublet of doublet of doublet, t: triplet, q: quadruplet, qd: doublet of quadruplet, quint: quintuplet, hept: heptuplet, m: multiplet, A: part A of an AB system, B: part B of an AB system, app: apparent.

**Table S2.** <sup>1</sup>H NMR quantitative determination of monacolins in RYR dietary supplements.

| DS number | Amount of monacolins (mg per capsule or tablet) <sup>1</sup> ± CV (RSD) (n = 3) |                                       |                                       |                                        |                                        |
|-----------|---------------------------------------------------------------------------------|---------------------------------------|---------------------------------------|----------------------------------------|----------------------------------------|
|           | Signal at 5.84 ppm <sup>2</sup><br>H6                                           | Signal at 5.56 ppm <sup>2</sup><br>H4 | Signal at 5.33 ppm <sup>2</sup><br>H1 | Signal at 4.60 ppm <sup>2</sup><br>H20 | Signal at 4.25 ppm <sup>2</sup><br>H22 |
| 1         | 1.67 ± 0.11 (6.0%)                                                              | 1.70 ± 0.13 (7.6%)                    | 3.31 ± 0.22 (6.6%)                    | 1.40 ± 0.11 (7.9%)                     | 1.34 ± 0.07 (5.2%)                     |
| 2         | 9.14 ± 0.79 (8.7%)                                                              | 9.18 ± 0.73 (7.9%)                    | 9.26 ± 0.22 (2.4%)                    |                                        | 7.10 ± 0.48 (6.8%)                     |
| 3         | 3.07 ± 0.36 (11.6%)                                                             | 3.07 ± 0.27 (8.8%)                    | 2.39 ± 0.07 (2.9%)                    |                                        |                                        |
| 4         | 1.02 ± 0.06 (5.9%)                                                              | 0.95 ± 0.07 (7.4%)                    | 1.64 ± 0.03 (1.8%)                    |                                        | 0.71 ± 0.02 (2.8%)                     |
| 5         | 2.47 ± 0.14 (5.8%)                                                              | 2.53 ± 0.15 (5.8%)                    | 11.3 ± 1.1 (9.4%)                     | 2.15 ± 0.08 (3.8%)                     |                                        |
| 6         | 2.92 ± 0.08 (2.7%)                                                              | 2.63 ± 0.20 (7.6%)                    | 3.27 ± 0.07 (2.1%)                    |                                        | 2.19 ± 0.15 (6.9%)                     |
| 7         | 3.76 ± 0.29 (7.6%)                                                              | 3.73 ± 0.37 (10.0%)                   |                                       |                                        |                                        |
| 8         | 8.68 ± 0.43 (4.9%)                                                              | 8.79 ± 0.29 (3.3%)                    | 8.65 ± 0.15 (1.7%)                    | 6.89 ± 0.46 (6.7%)                     | 7.73 ± 0.37 (4.8%)                     |
| 9         | 5.14 ± 0.44 (8.5%)                                                              | 5.21 ± 0.36 (6.9%)                    | 8.03 ± 0.20 (2.5%)                    | 4.55 ± 0.35 (7.6%)                     | 4.55 ± 0.40 (8.8%)                     |
| 10        | 2.10 ± 0.06 (3.0%)                                                              | 2.04 ± 0.27 (13.2%)                   | 8.67 ± 0.13 (1.5%)                    |                                        | 1.22 ± 0.07 (5.8%)                     |
| 11        |                                                                                 |                                       |                                       |                                        |                                        |
| 12        |                                                                                 |                                       |                                       |                                        |                                        |
| 13        | 23.9 ± 1.8 (7.6%)                                                               | 23.9 ± 1.6 (6.9%)                     | 21.9 ± 0.5 (2.4%)                     | 23.9 ± 0.4 (1.7%)                      | 23.2 ± 1.9 (8.3%)                      |
| 14        | 3.45 ± 0.10 (2.8%)                                                              | 3.28 ± 0.26 (7.9%)                    | 10.8 ± 0.2 (1.5%)                     |                                        | 2.26 ± 0.10 (4.2%)                     |
| 15        | 11.9 ± 0.2 (1.6%)                                                               | 12.3 ± 0.3 (2.6%)                     |                                       | 9.85 ± 0.53 (5.4%)                     |                                        |
| 16        |                                                                                 | 0.31 ± 0.03 (8.7%)                    |                                       |                                        |                                        |
| 17        | 1.47 ± 0.04 (2.7%)                                                              | 1.51 ± 0.08 (5.0%)                    | 4.06 ± 0.07 (1.7%)                    | 1.28 ± 0.14 (11.0%)                    |                                        |
| 18        | 8.84 ± 0.41 (5.0%)                                                              | 8.19 ± 0.30 (3.7%)                    |                                       | 6.68 ± 0.39 (5.8%)                     | 7.04 ± 0.69 (9.8%)                     |

|    |                     |                     |                    |                     |                     |
|----|---------------------|---------------------|--------------------|---------------------|---------------------|
| 19 | 0.36 ± 0.02 (5.6%)  | 0.44 ± 0.04 (6.9%)  |                    |                     |                     |
| 20 | 1.75 ± 0.07 (4.0%)  | 1.77 ± 0.08 (4.2%)  | 3.51 ± 0.21 (6.0%) | 1.27 ± 0.08 (6.3%)  | 1.49 ± 0.08 (5.4%)  |
| 21 | 0.48 ± 0.06 (12.5%) | 0.47 ± 0.06 (12.8%) |                    |                     |                     |
| 22 | 3.09 ± 0.17 (5.4%)  | 3.02 ± 0.26 (8.5%)  |                    |                     | 2.26 ± 0.17 (7.6%)  |
| 23 | 10.6 ± 0.2 (1.9%)   | 10.7 ± 1.0 (9.2%)   | 10.0 ± 0.9 (8.9%)  | 10.0 ± 1.2 (11.8%)  | 9.77 ± 0.71 (7.3%)  |
| 24 | 11.5 ± 0.7 (5.9%)   | 11.8 ± 0.8 (6.7%)   | 9.38 ± 0.61 (6.5%) |                     | 5.97 ± 0.12 (2.0%)  |
| 25 | 10.0 ± 0.3 (2.6%)   | 9.72 ± 0.20 (2.1%)  |                    | 5.97 ± 0.12 (2.0%)  | 7.26 ± 0.63 (8.7%)  |
| 26 | 4.51 ± 0.35 (7.4%)  | 4.54 ± 0.19 (4.2%)  |                    |                     | 3.88 ± 0.25 (6.5%)  |
| 27 | 4.13 ± 0.21 (5.1%)  | 3.84 ± 0.24 (6.3%)  |                    | 2.97 ± 0.32 (10.8%) | 2.90 ± 0.26 (9.0%)  |
| 28 | 1.64 ± 0.10 (6.1%)  | 1.75 ± 0.15 (8.6%)  |                    | 1.05 ± 0.09 (8.6%)  | 1.31 ± 0.14 (10.7%) |
| 29 |                     |                     |                    |                     |                     |
| 30 | 2.99 ± 0.11 (3.7%)  | 3.04 ± 0.12 (3.9%)  | 2.61 ± 0.05 (1.9%) |                     | 2.43 ± 0.23 (9.5%)  |
| 31 | 1.21 ± 0.10 (8.6%)  | 1.28 ± 0.11 (8.6%)  | 2.16 ± 0.09 (4.2%) |                     |                     |

<sup>1</sup> The amounts of monacolins (mg per dosage unit) were calculated from the measured areas using the equation presented in the paragraph 3.4.2.

<sup>2</sup> The resonances at 5.84, 5.56 ppm and 5.33 ppm are characteristic of all the monacolins bearing an hexahydronaphthalene ring but the 5.33 ppm signal does not characterize MJ and ML in lactone or in hydroxyl acid form; the resonances at 4.60 and 4.25 ppm are specific of all the monacolins in lactone form including dihydromonacolins.

**Table S3.** Comparison of monacolin amounts measured in RYR dietary supplements by <sup>1</sup>H NMR and UHPLC.

| NMR signal considered                                     | Number of samples | Quantified monacolins (M) <sup>1</sup>                                               | Linear regression equation $y = a + bx^2$ |                    |       | p-value <sup>3</sup> |
|-----------------------------------------------------------|-------------------|--------------------------------------------------------------------------------------|-------------------------------------------|--------------------|-------|----------------------|
|                                                           |                   |                                                                                      | $b \pm Sb$                                | $a \pm Sa$         | $r^2$ |                      |
| 5.84 ppm                                                  | 27                | TotalM - DiMK                                                                        | $0.986 \pm 0.018$                         | $0.004 \pm 0.130$  | 0.992 | 0.9365               |
| 5.56 ppm                                                  | 28                | TotalM - DiMK                                                                        | $0.984 \pm 0.017$                         | $0.044 \pm 0.117$  | 0.993 | 0.6570               |
| Mean intensity of the two signals at 5.84 and 5.56 ppm    | 28                | TotalM - DiMK                                                                        | $0.985 \pm 0.017$                         | $0.025 \pm 0.117$  | 0.993 | 0.6406               |
| 4.60 ppm or 4.25 ppm or mean intensity of the two signals | 22                | All M in lactone form (MJ, MN, MX, ML, CP, MK, DiMK)                                 | $0.983 \pm 0.015$                         | $0.013 \pm 0.099$  | 0.996 | 0.4953               |
| 5.33 ppm                                                  | 17                | MN, MX, MKA, CP, MK, DeML, DeMK                                                      | $0.952 \pm 0.152$                         | $-1.504 \pm 1.321$ | 0.723 | 0.0191               |
| Mean intensity of the two signals at 5.84 and 5.56 ppm    | 28                | All M determined by <sup>1</sup> H NMR (TotalM - DiMK) vs TotalM determined by UHPLC | $1.001 \pm 0.023$                         | $0.113 \pm 0.166$  | 0.986 | 0.2549               |

<sup>1</sup> The monacolin amount determined by <sup>1</sup>H NMR for each RYR dietary supplement (Table 3) was compared to that measured by UHPLC for the same group of monacolins (Table 5) except in the last line of the table.

<sup>2</sup> The statistics for the straight lines were obtained with the LINEST function included in the Microsoft Excel software. b represents the slope of the linear regression and a the y-intercept. Sa and Sb correspond to the standard error values for the constants a and b, and r<sup>2</sup> is based on the Pearson's linear correlation coefficient.

<sup>3</sup> p-values were determined with the Wilcoxon signed-rank test.



**Figure S1.**  $^1\text{H}$  NMR spectra ( $\text{CD}_3\text{CN}:\text{D}_2\text{O}$  (80:20)) of all the dietary supplements analyzed in the present study. Upper part: entire spectrum, lower part: enlarged downfield region (4-9 ppm). FA: fatty acids (saturated and unsaturated); UFA: non-conjugated unsaturated fatty acids; Monacolins OHAc: monacolins in hydroxyl acid form.

DS 1

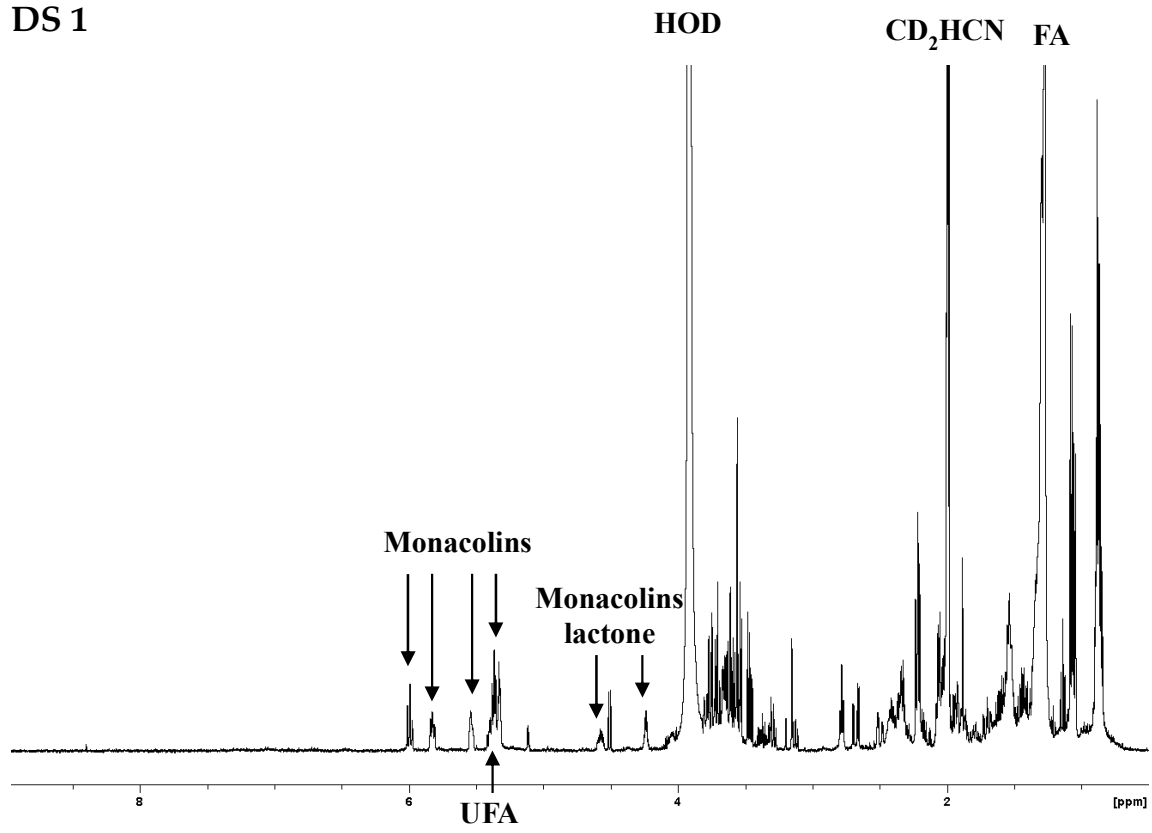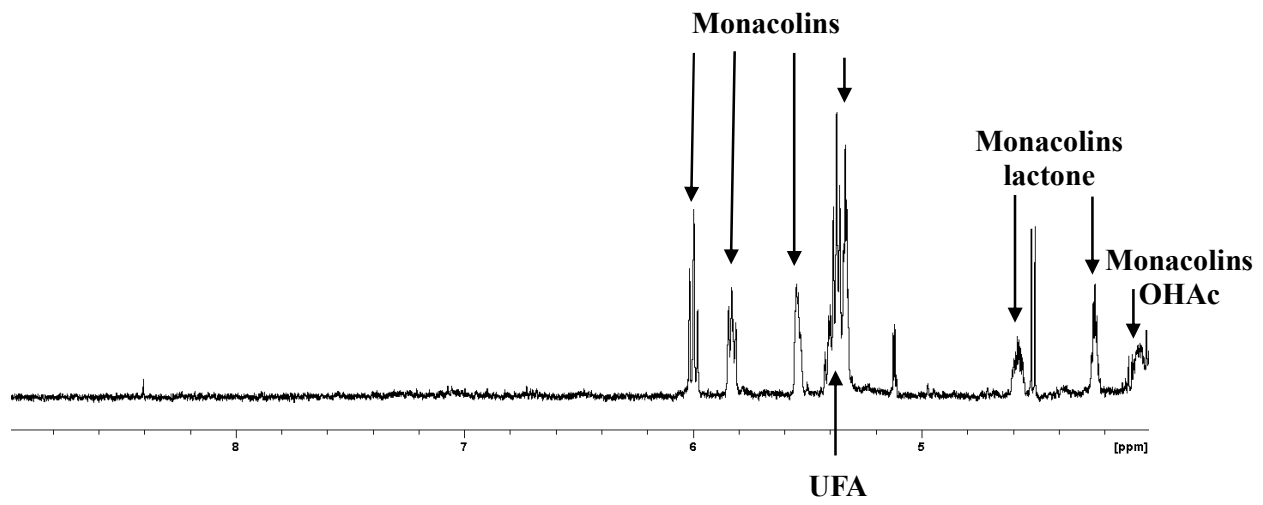

DS 2

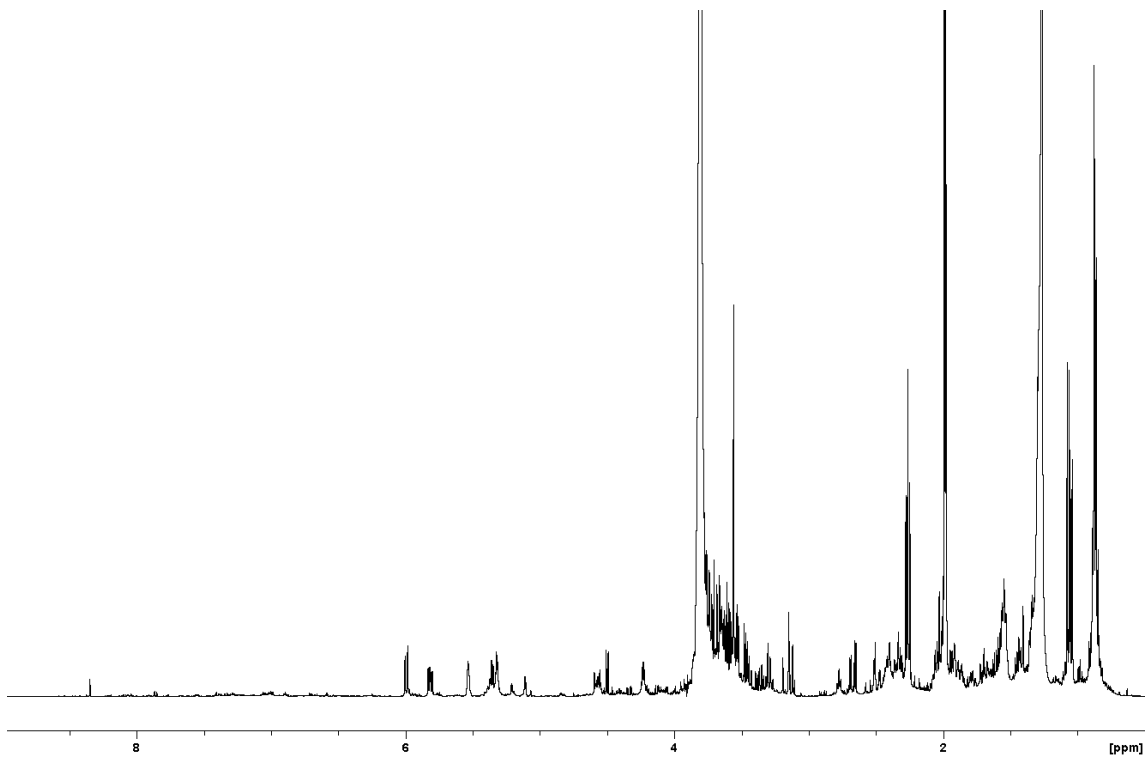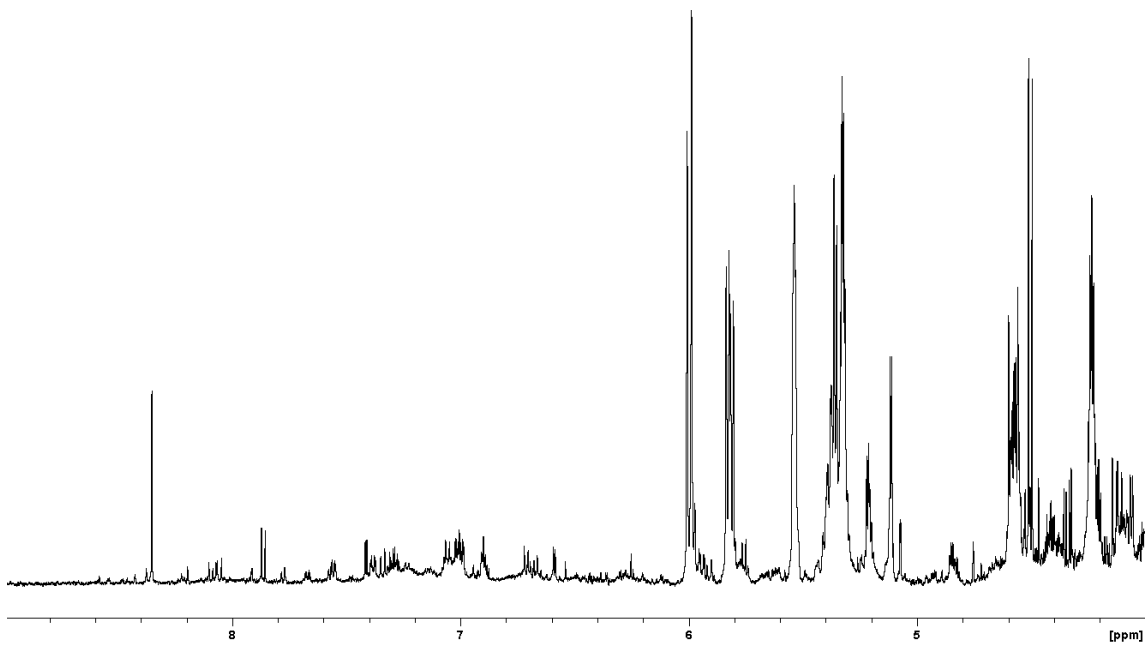

DS 3

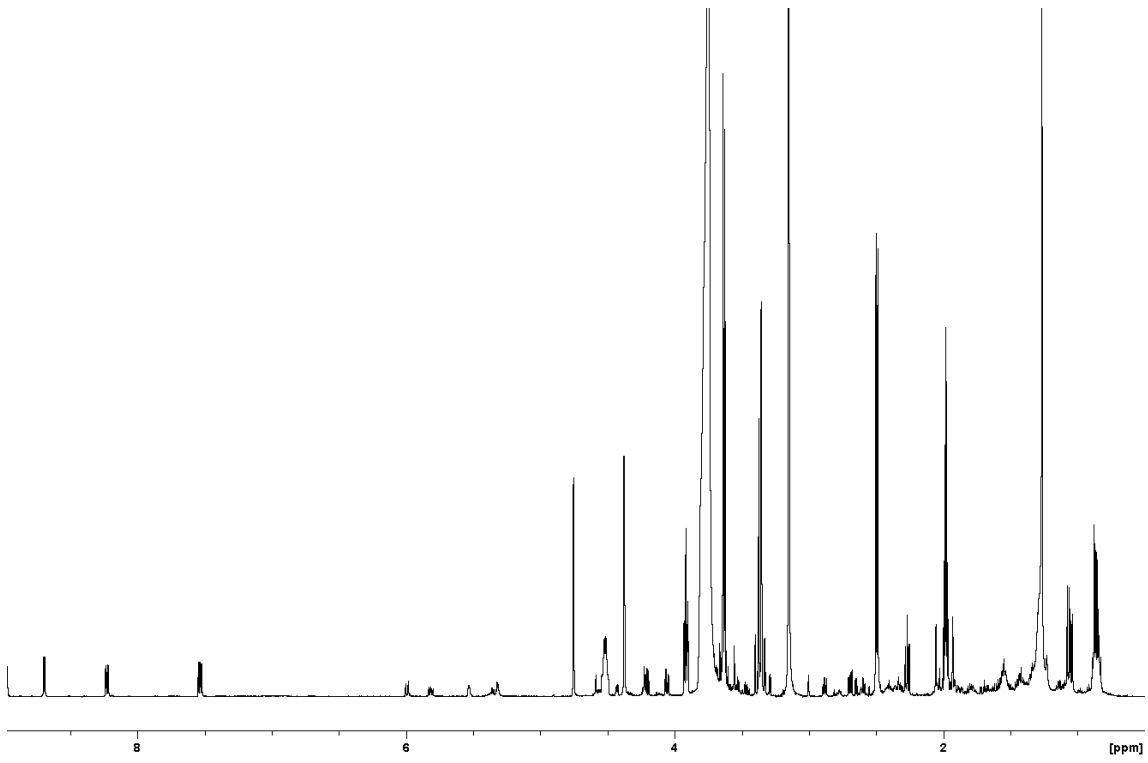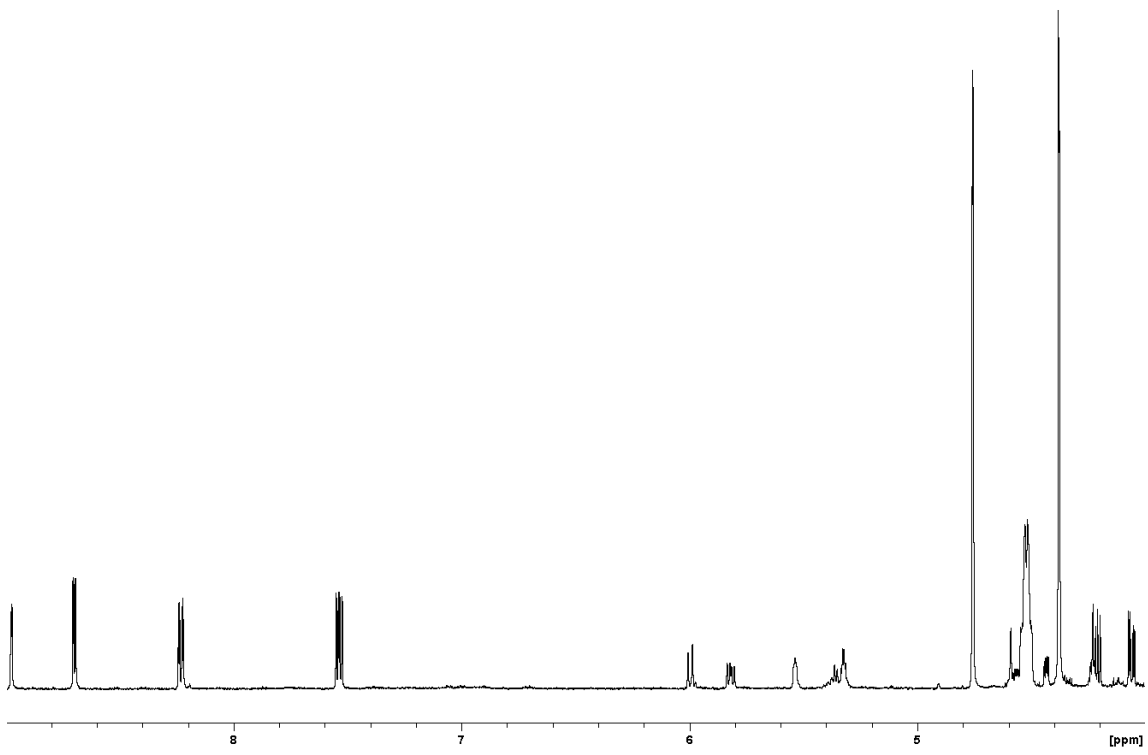

DS 4

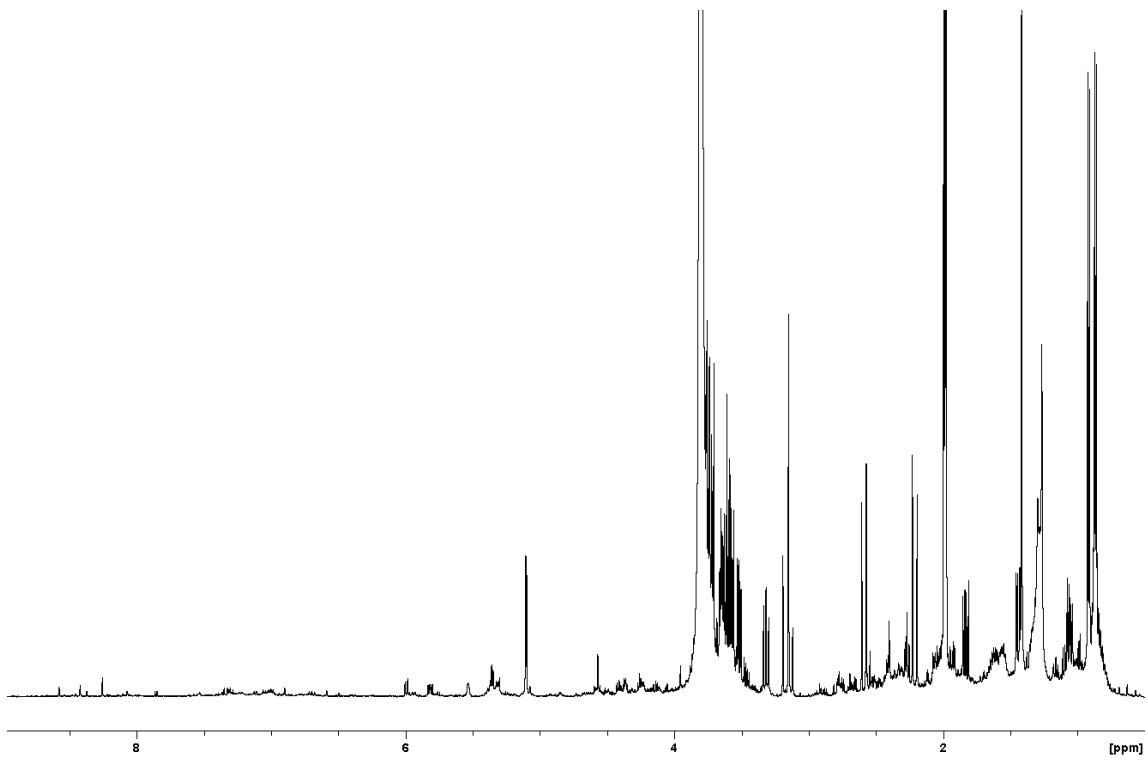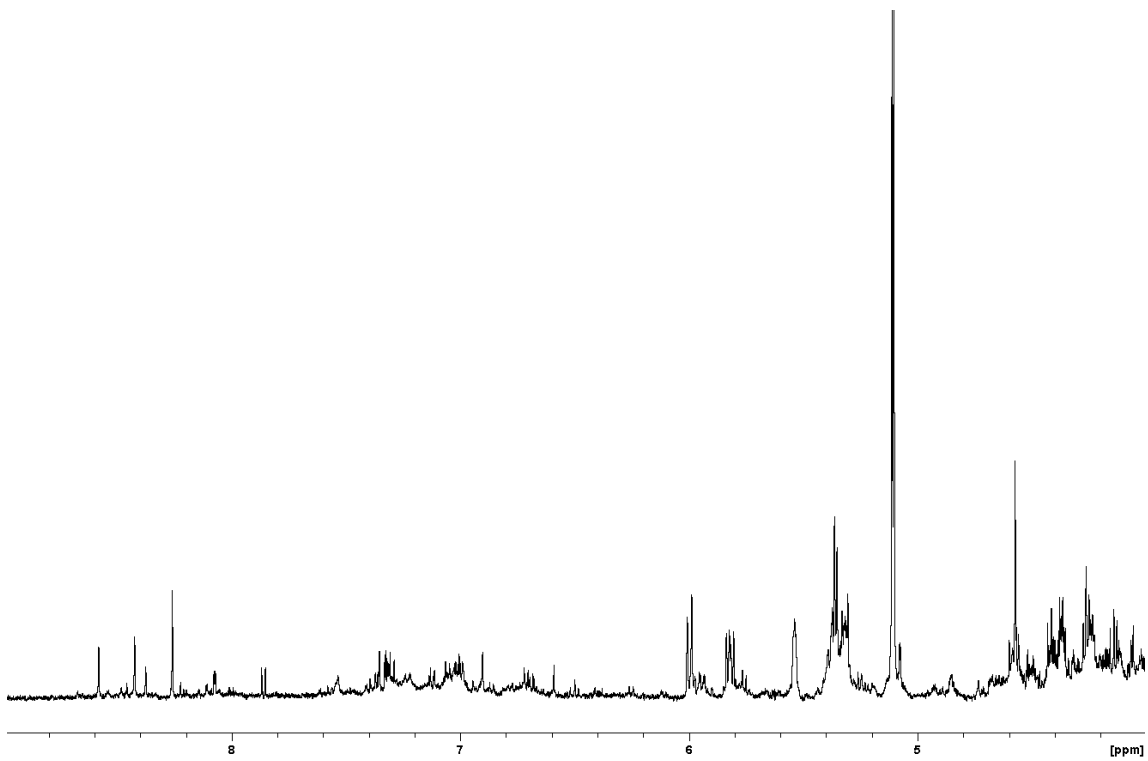

DS 5

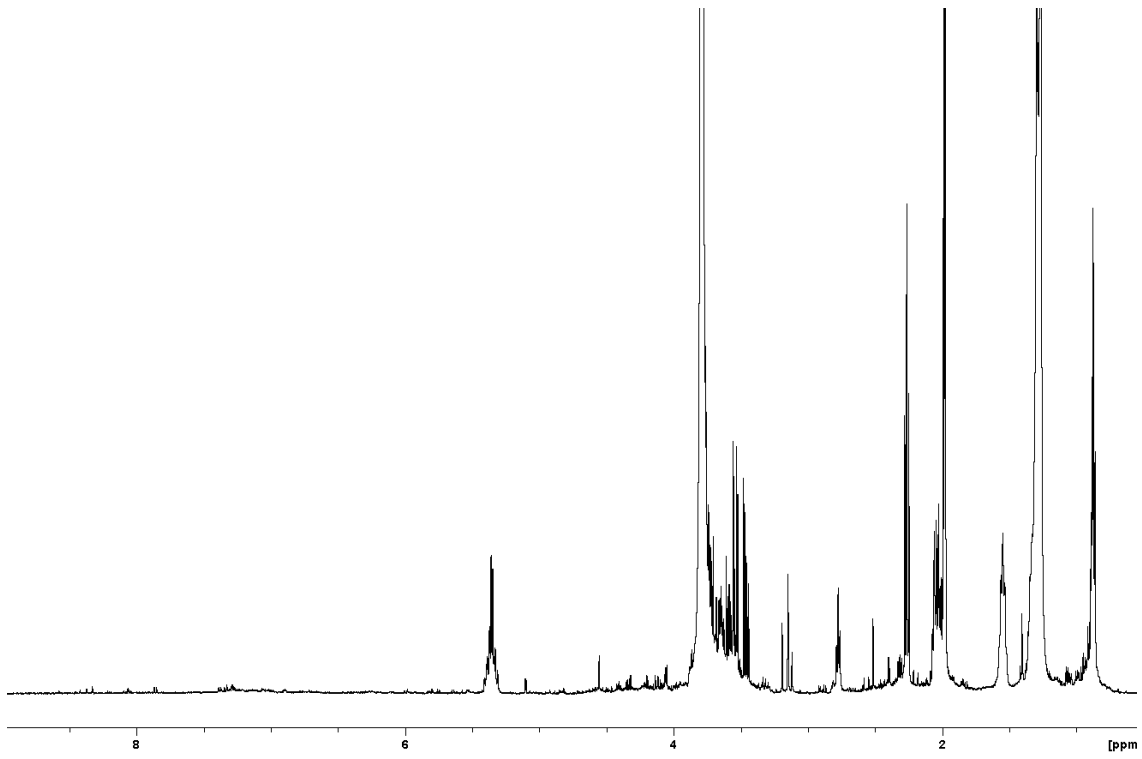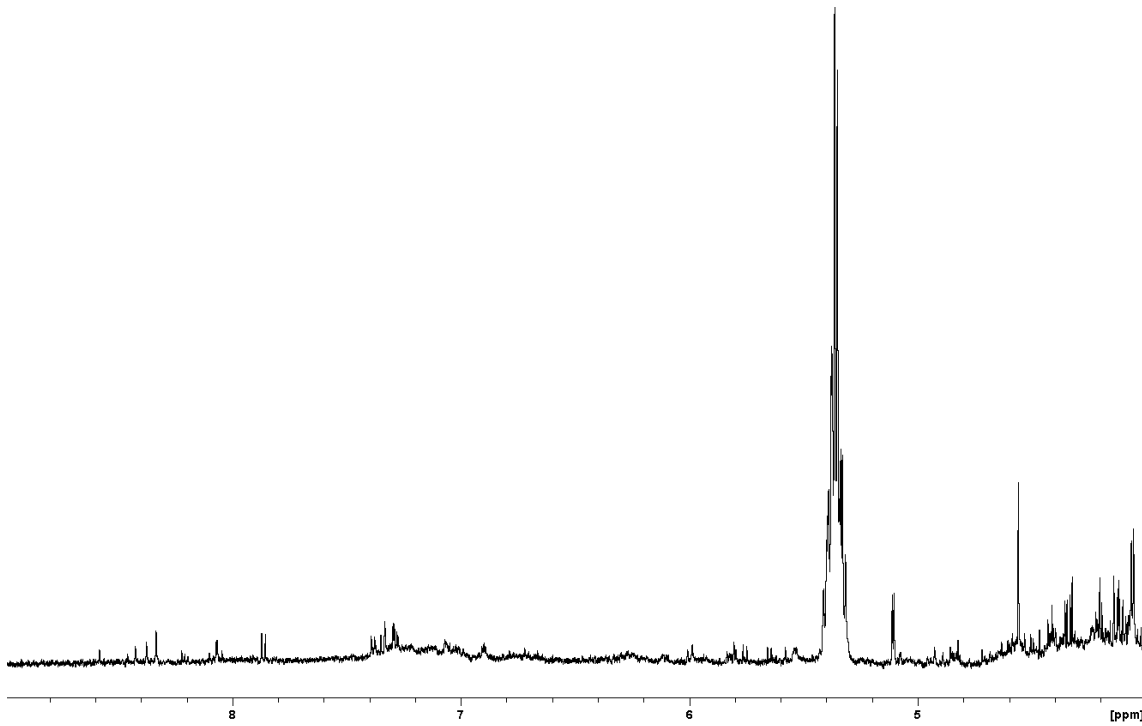

DS 6

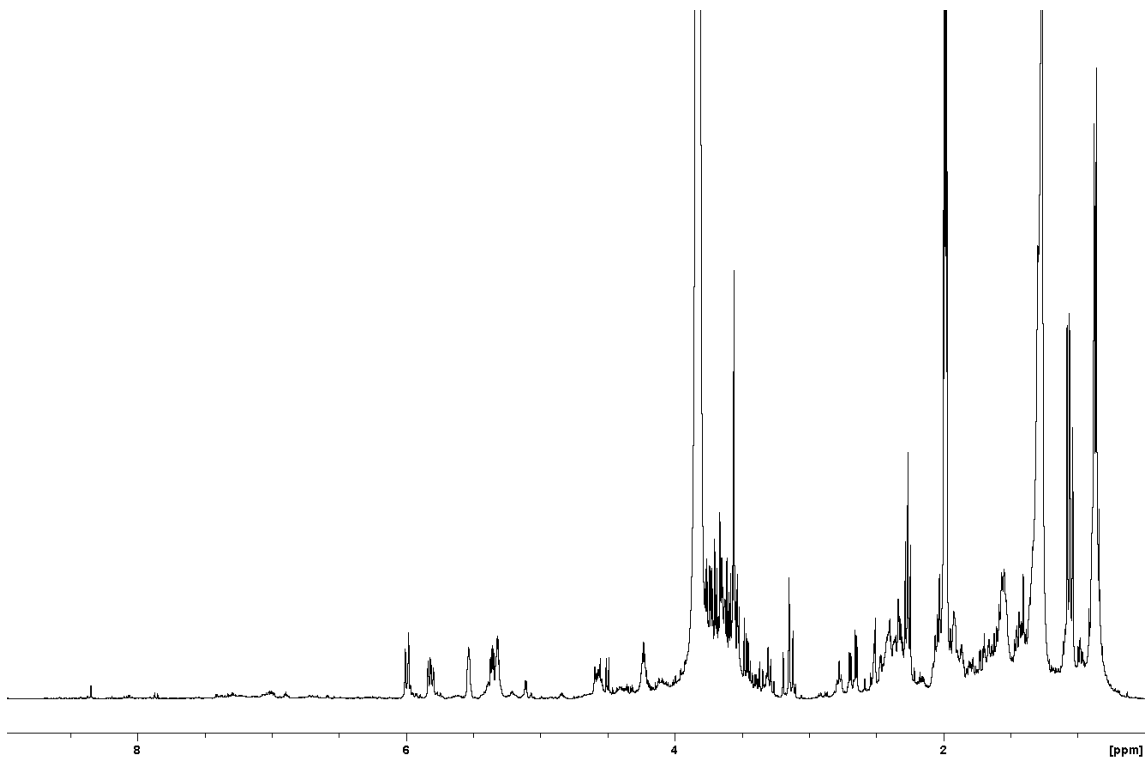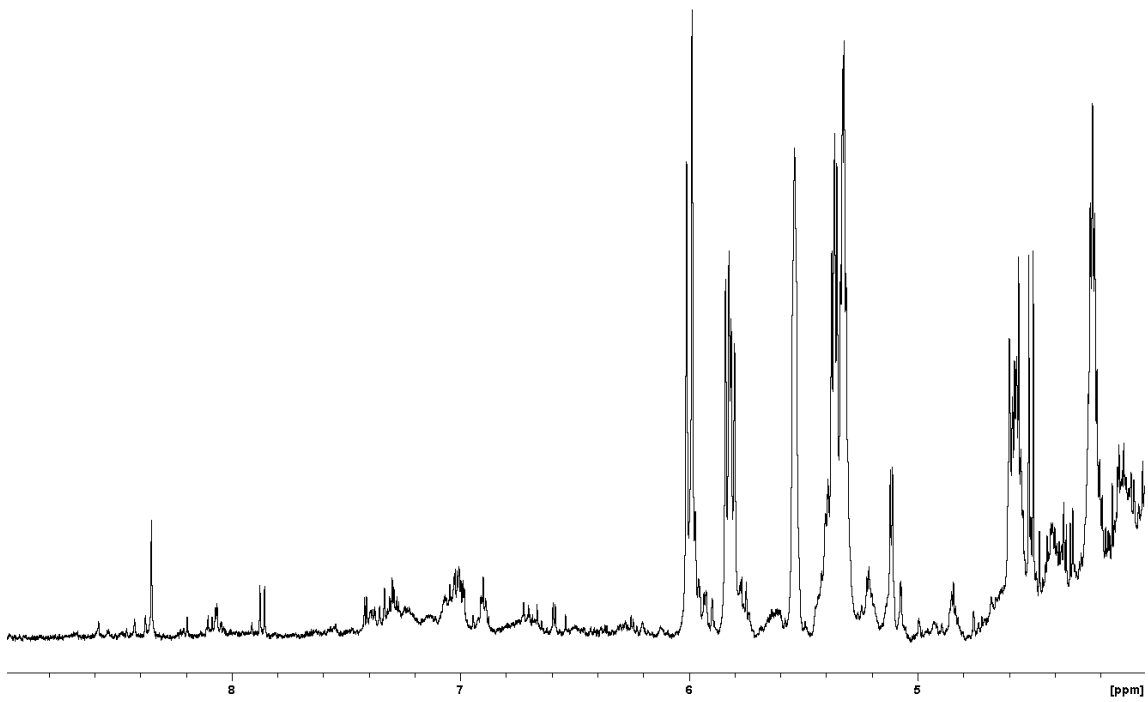

DS 7

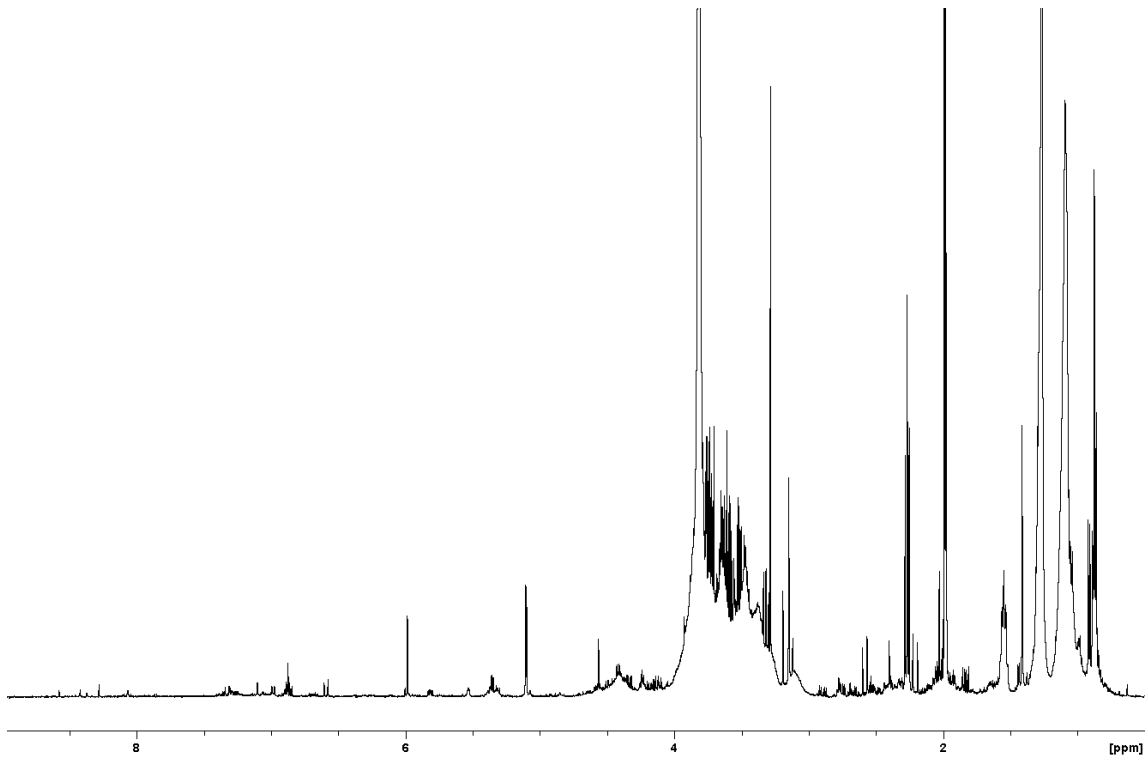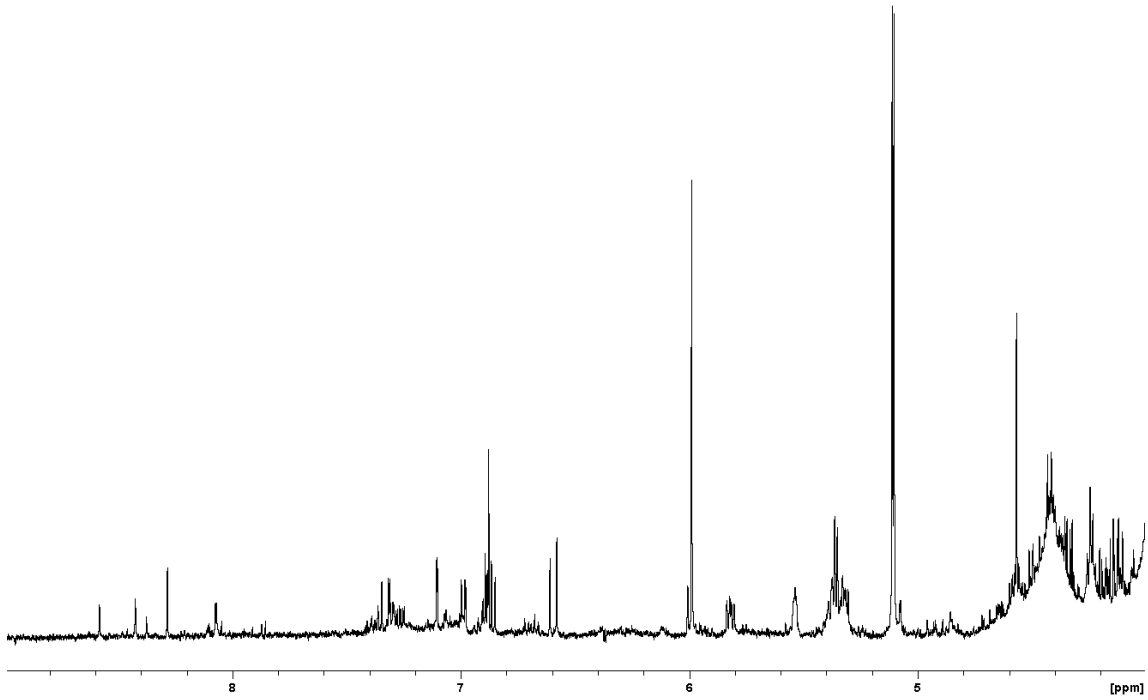



DS 8

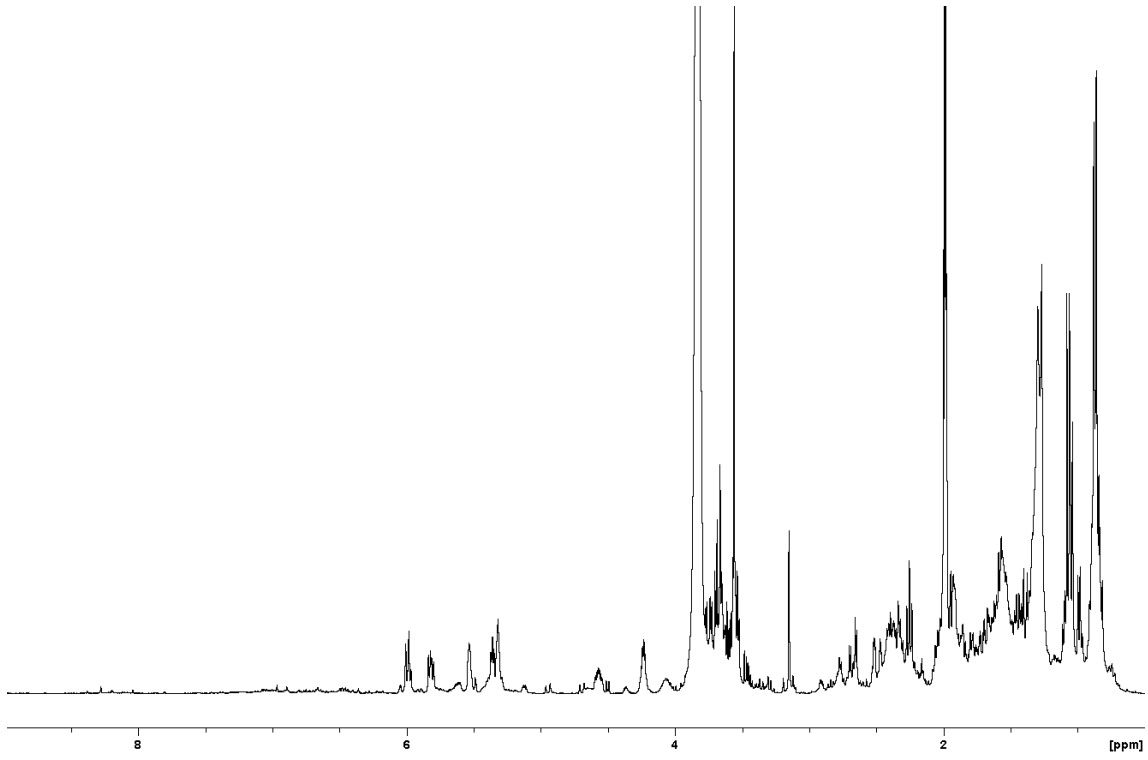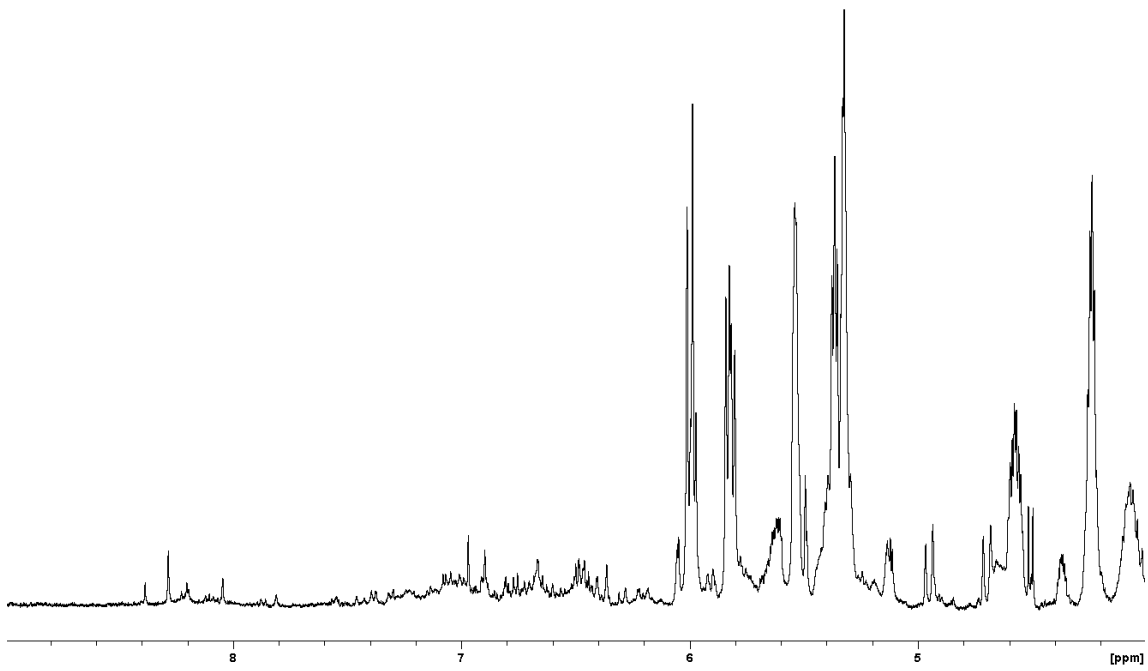

DS 9

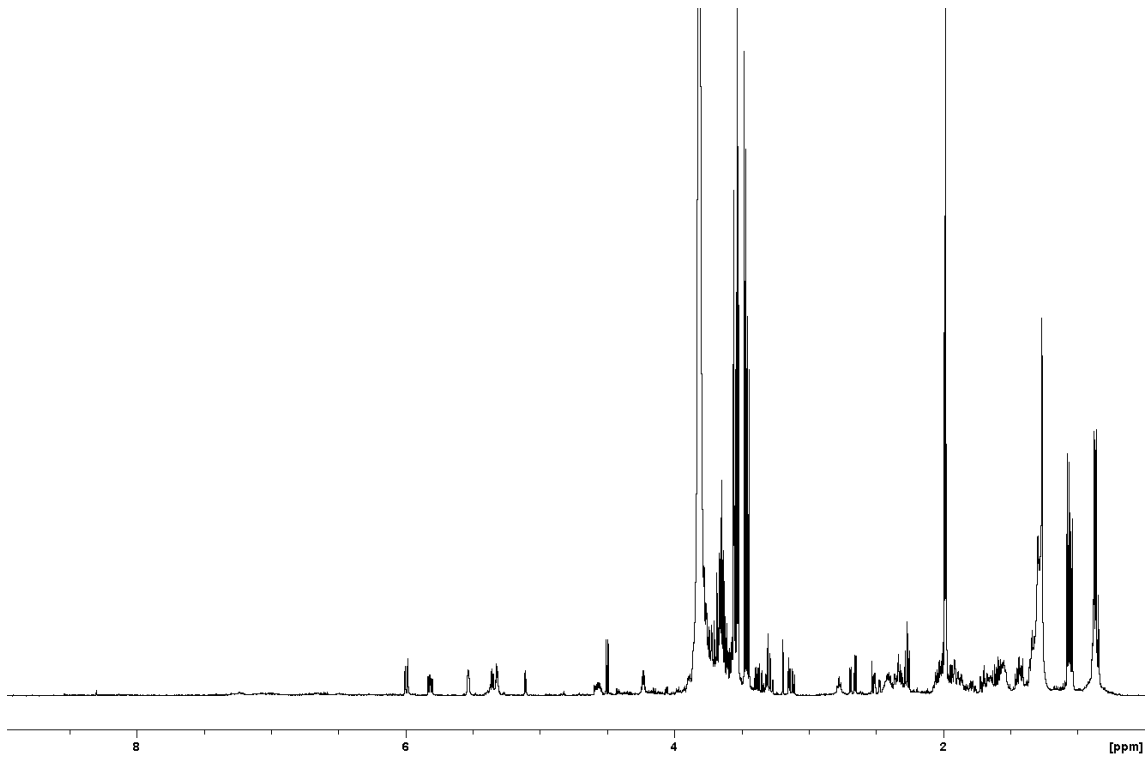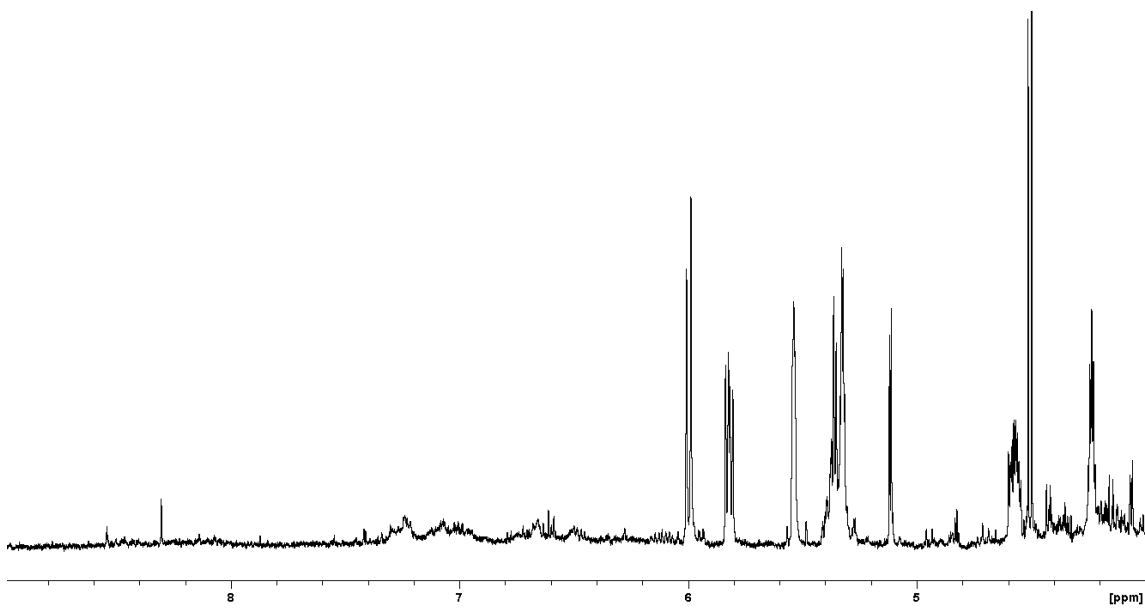

DS 10

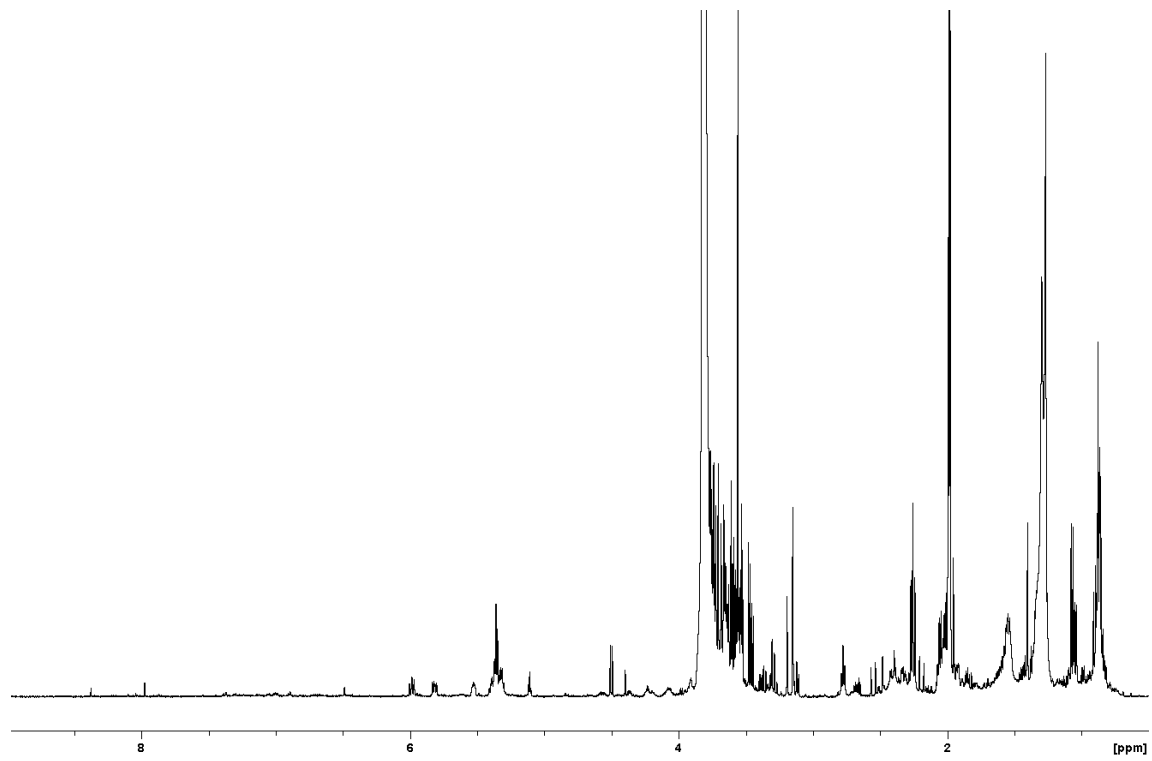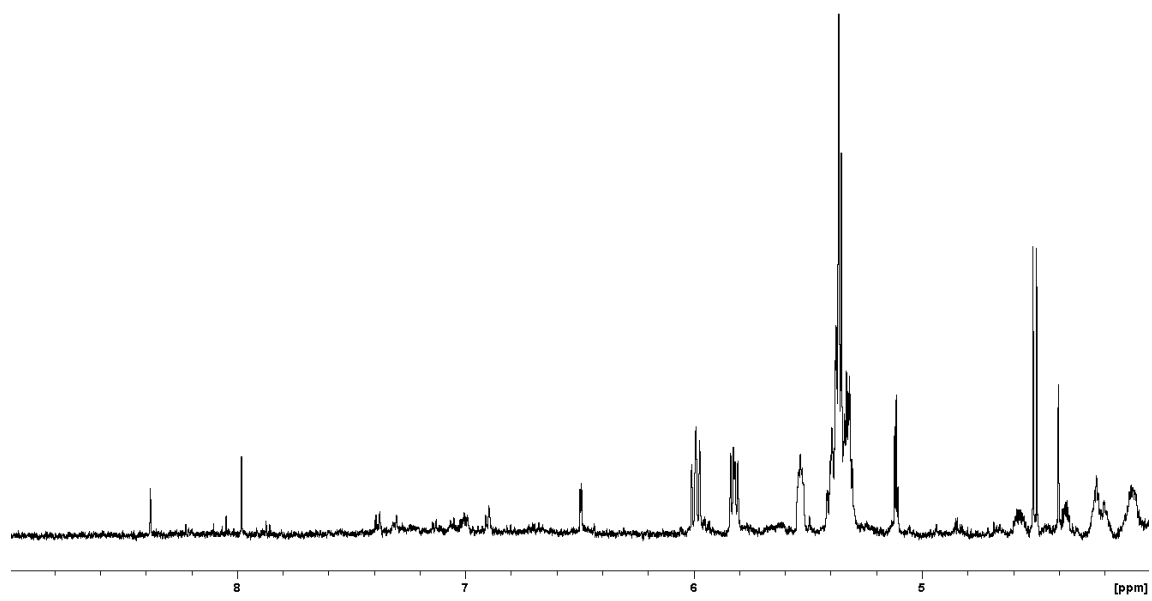

DS 11 No monacolins detected

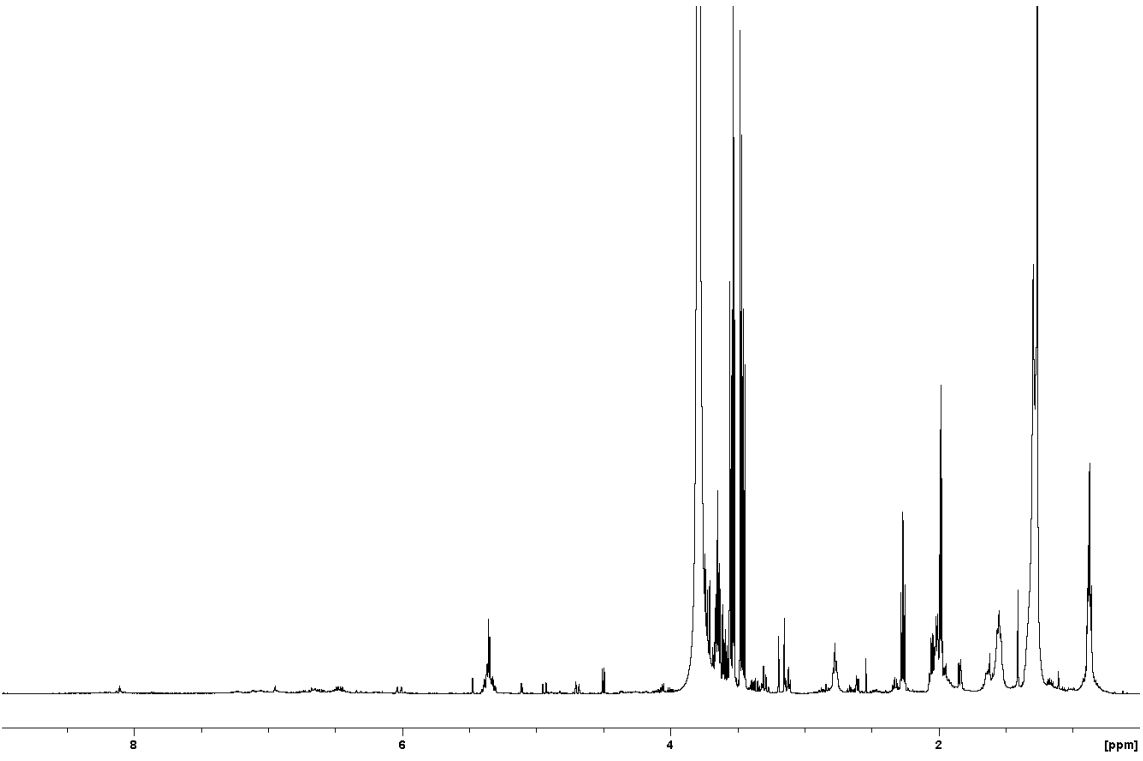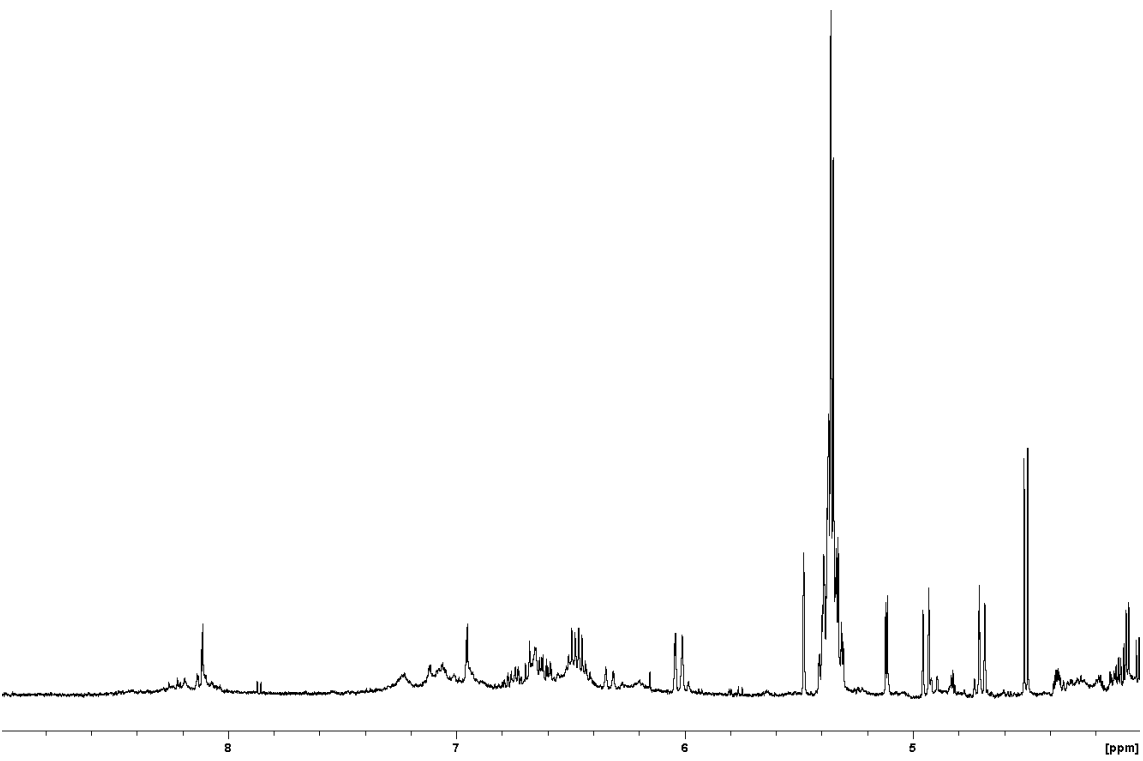

DS 12 No monacolins detected

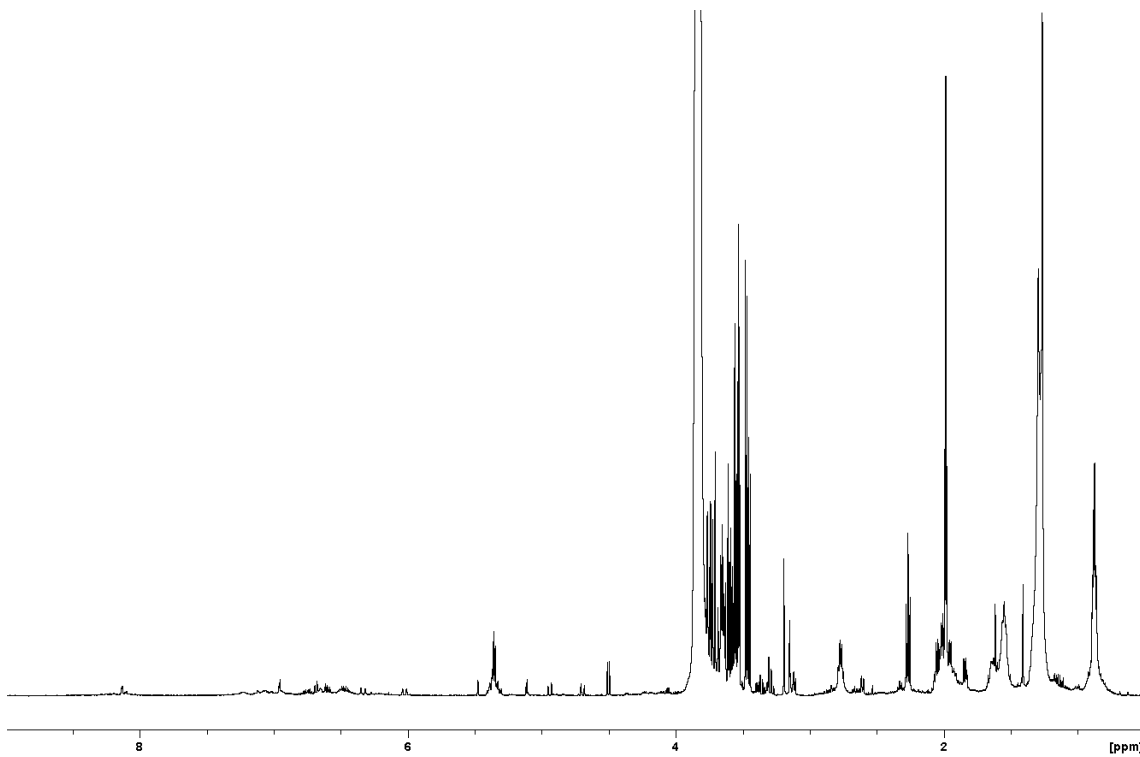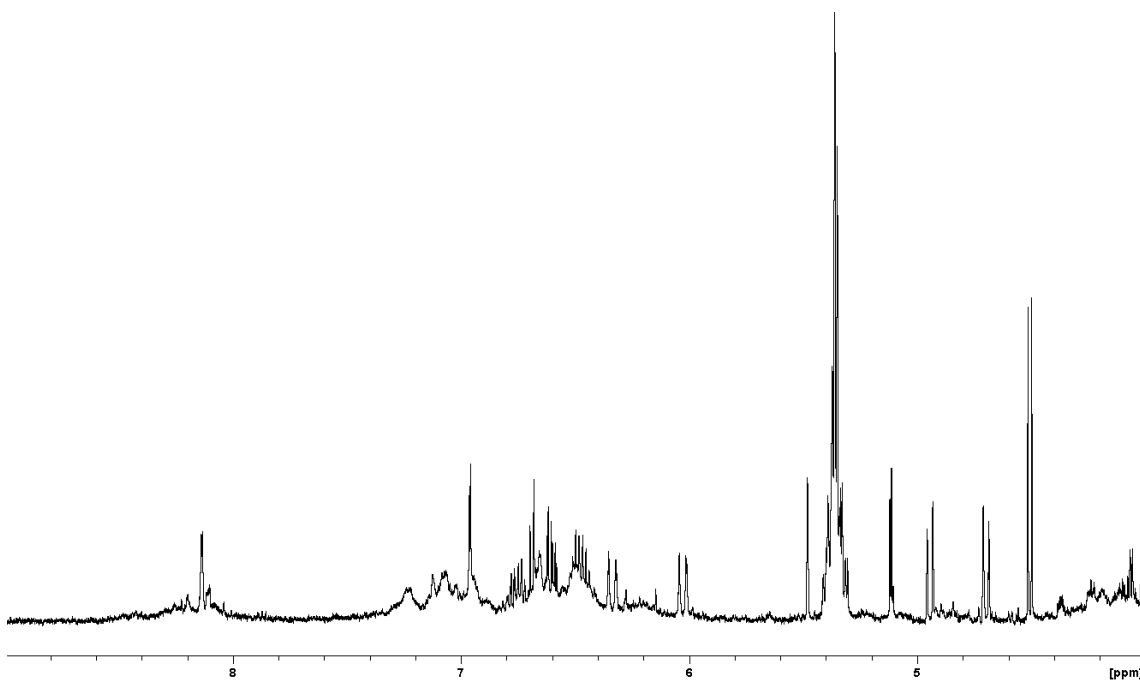

DS 13

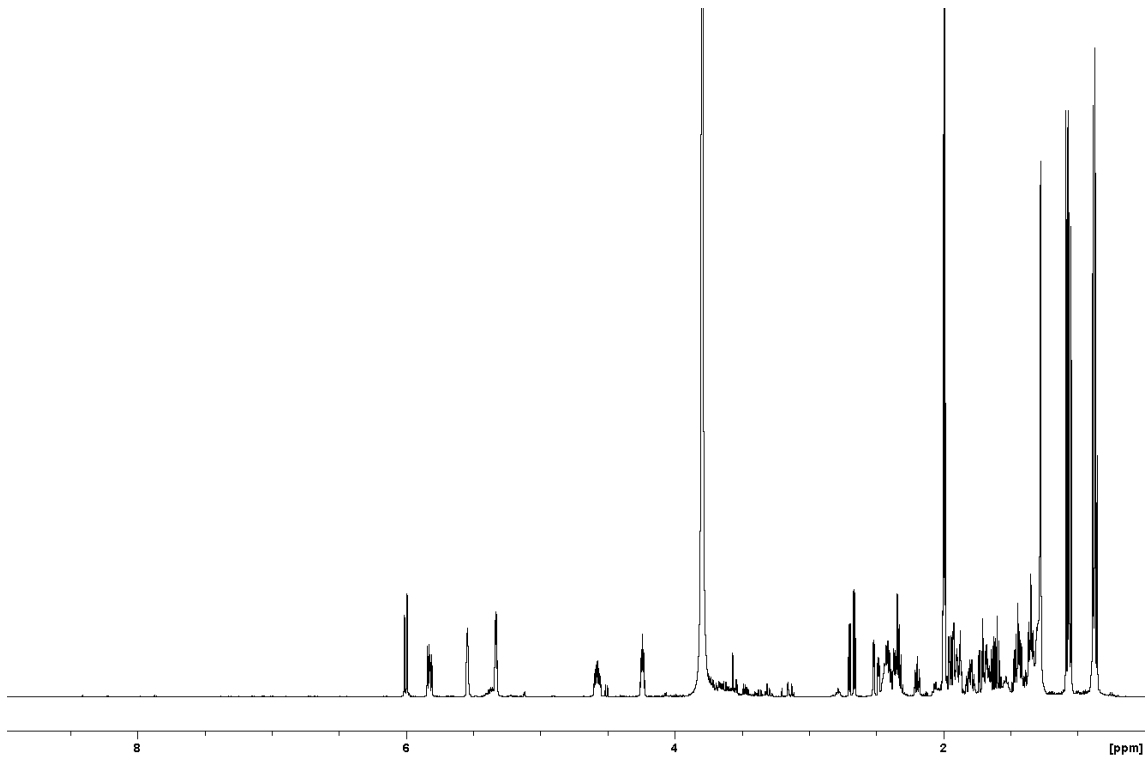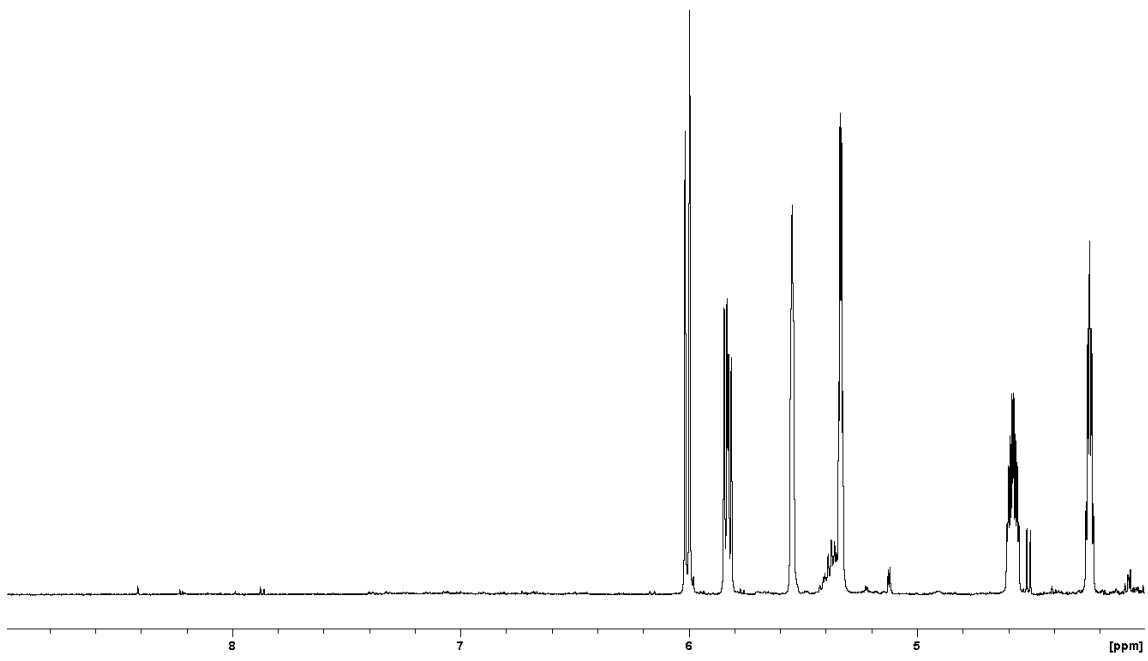

DS 14

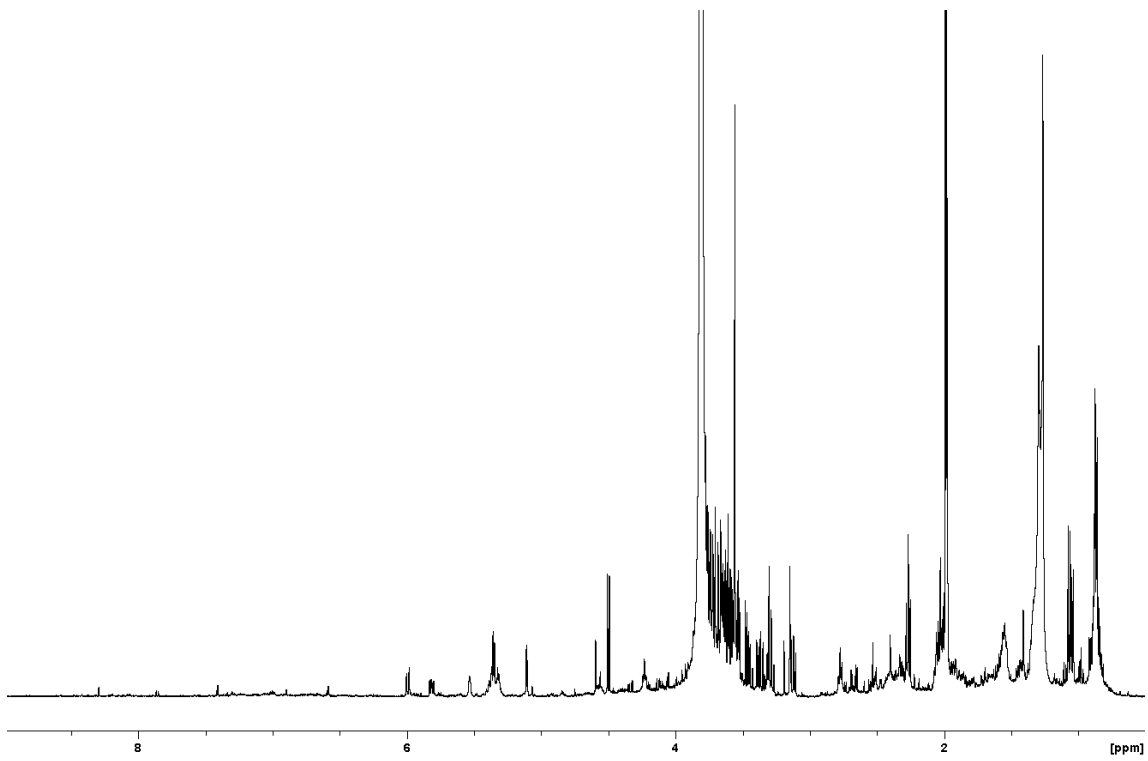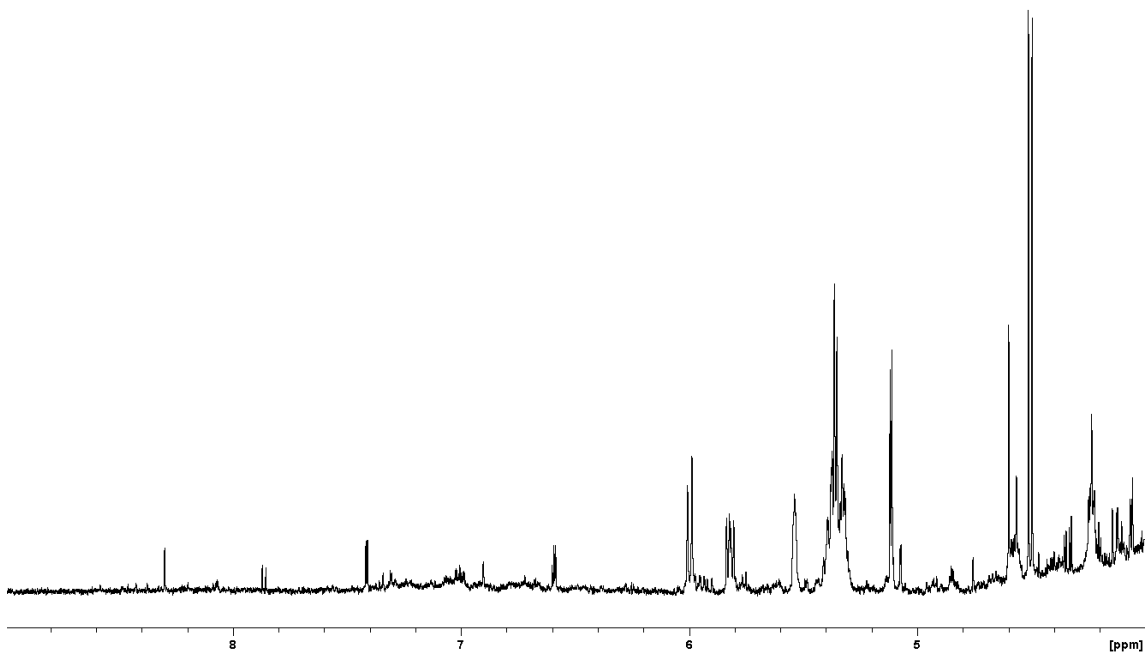

DS 15

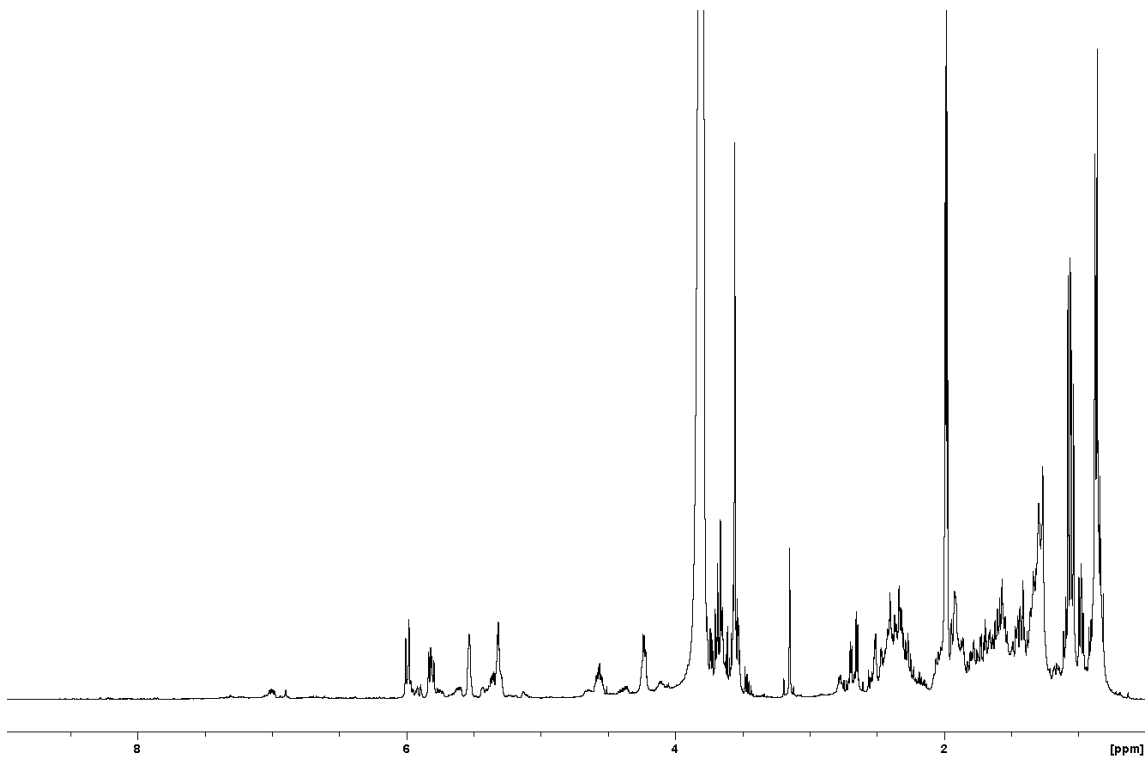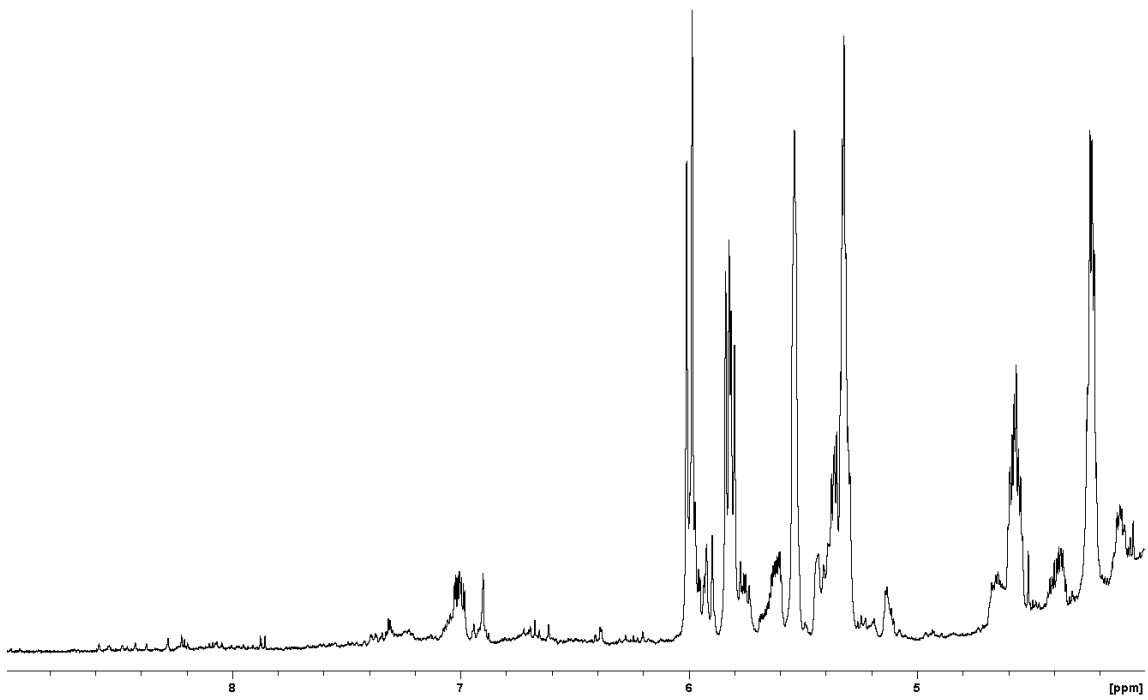



**DS 16 Monacolins hardly detected**

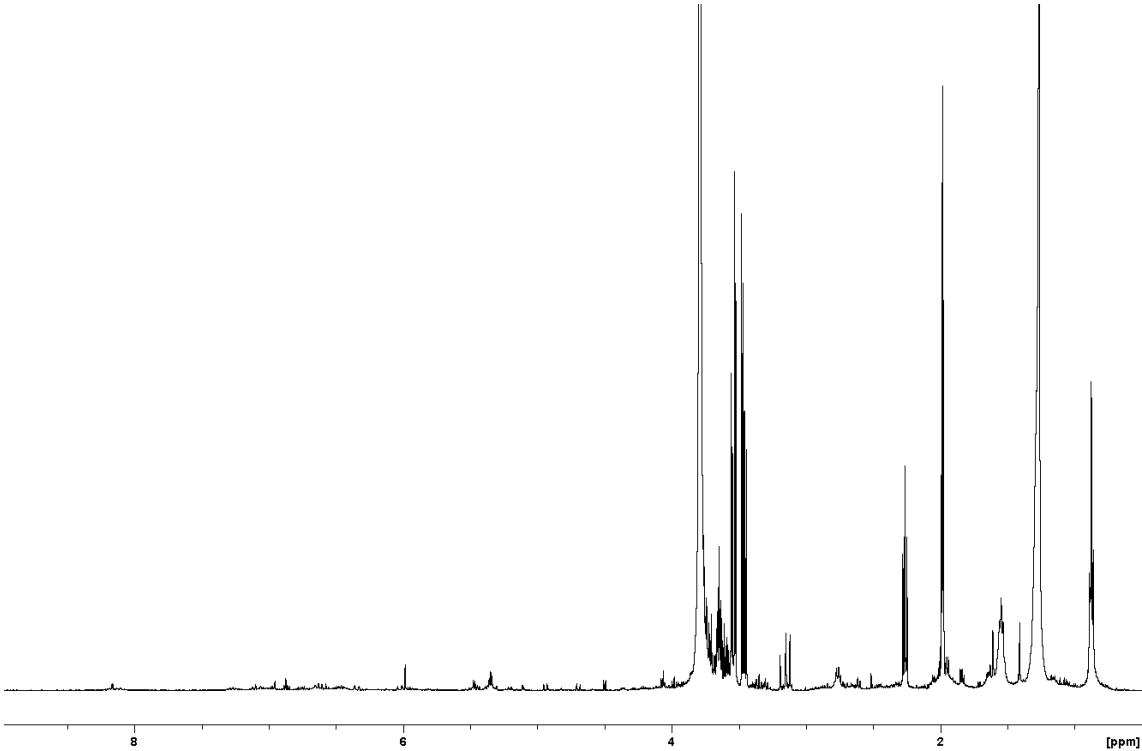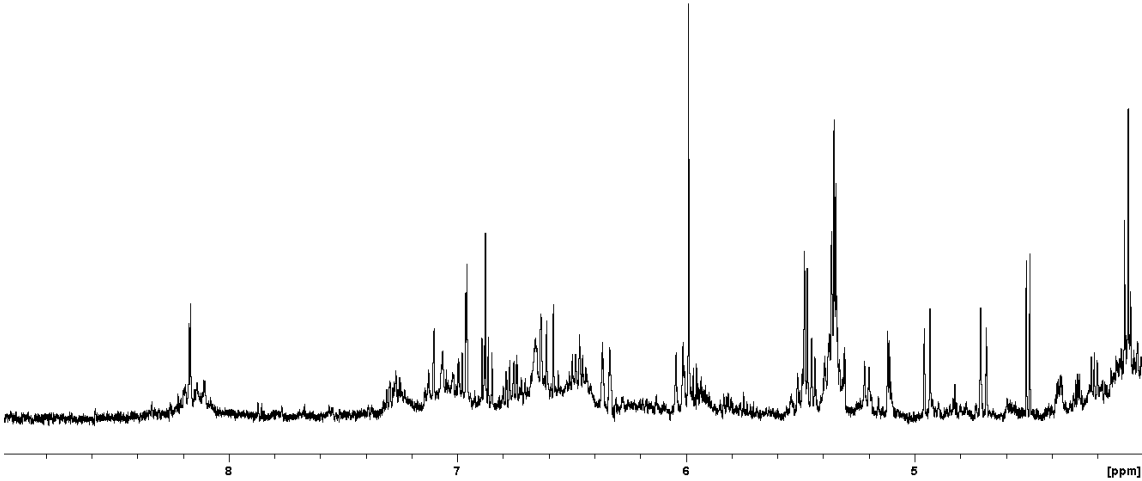

DS 17

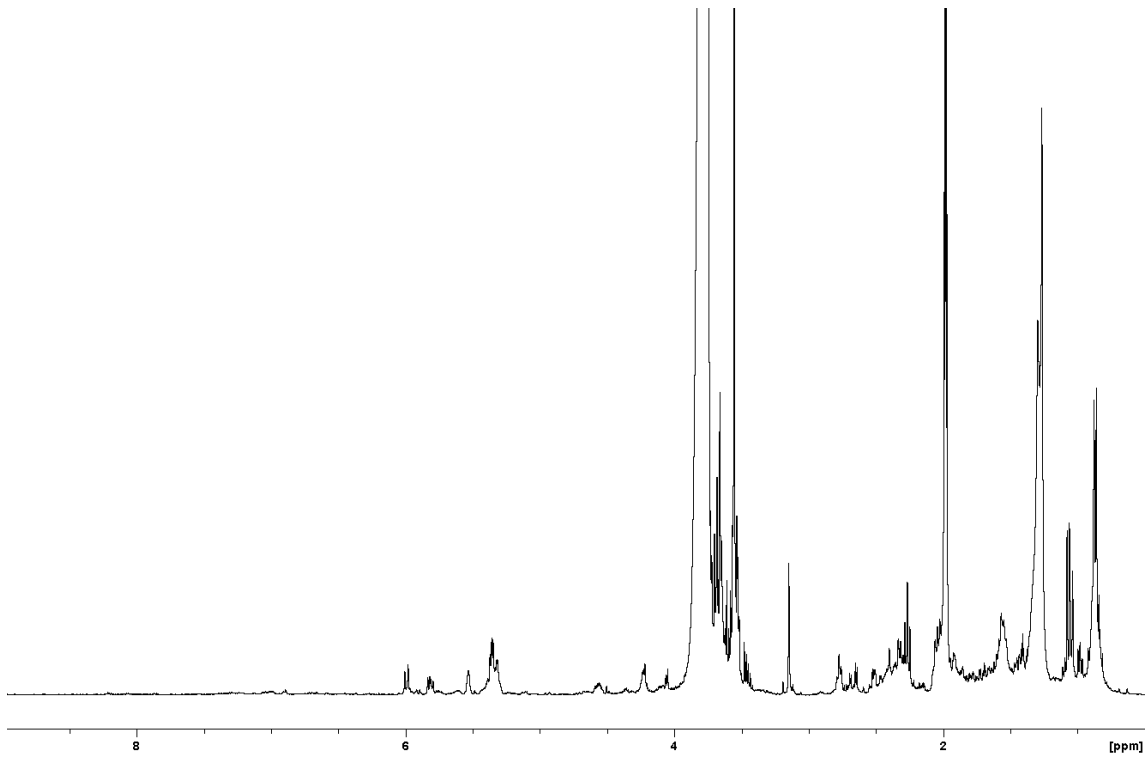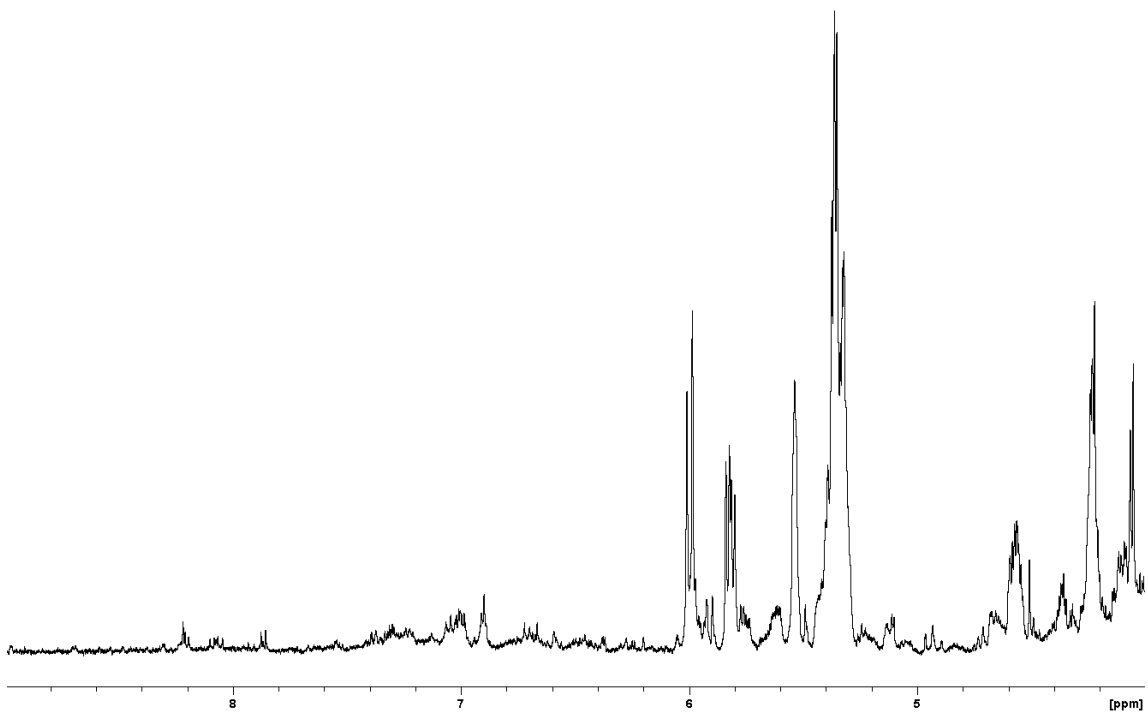

DS 18

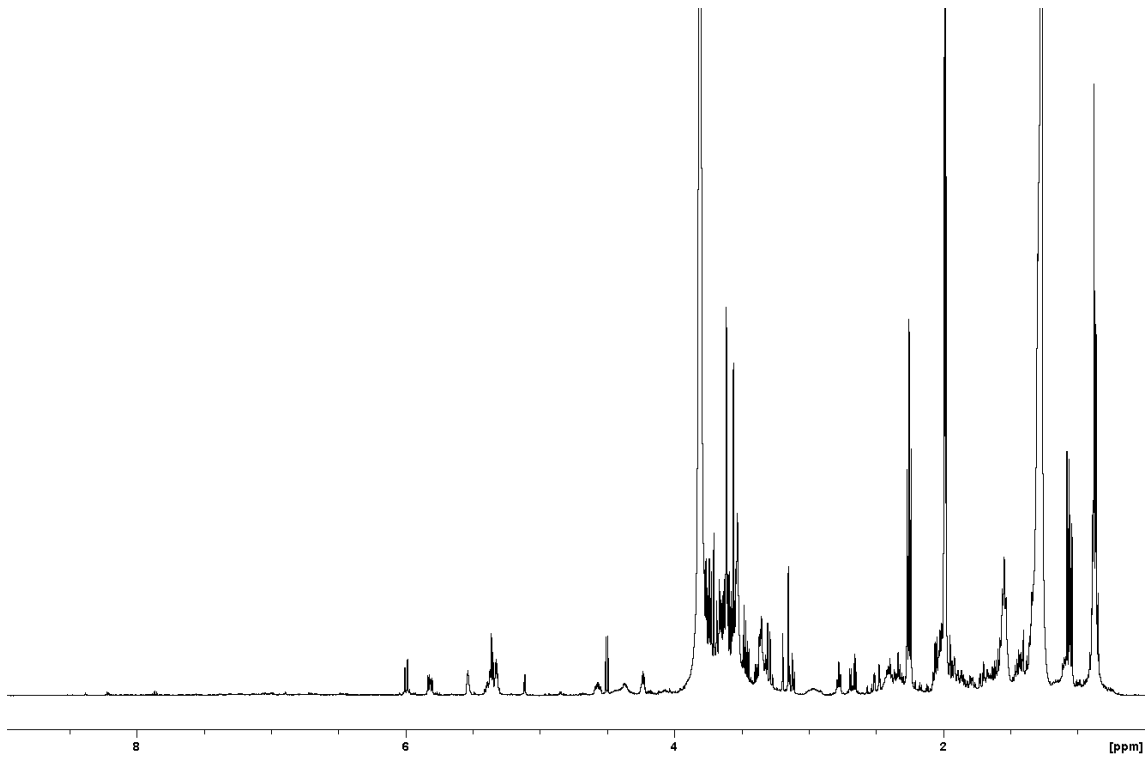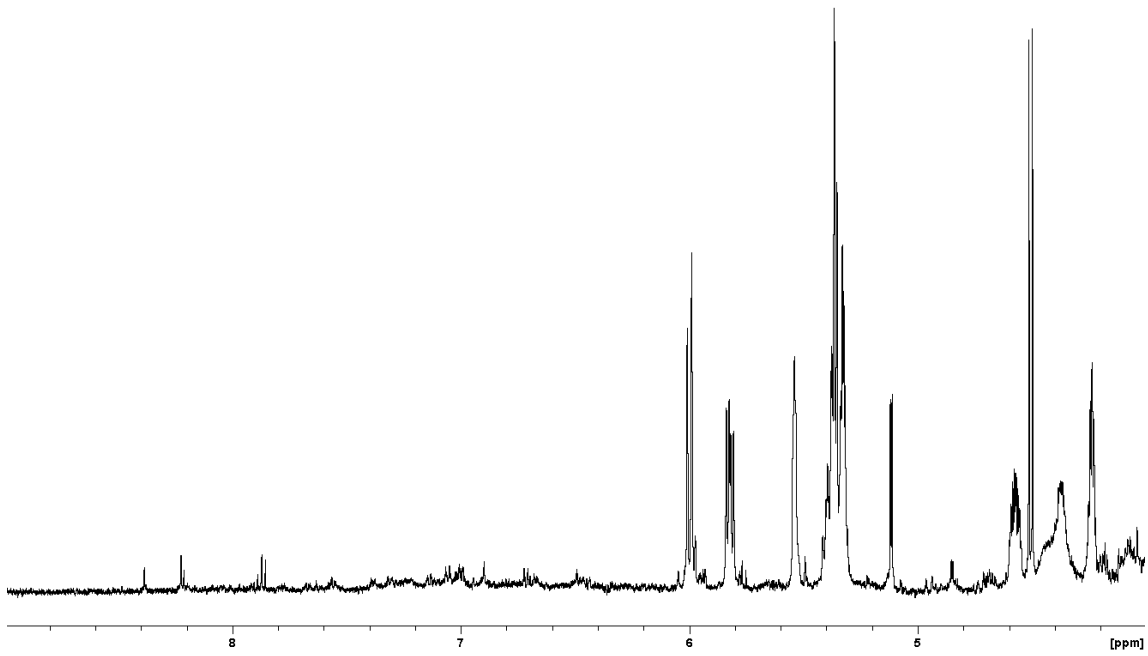

DS 19

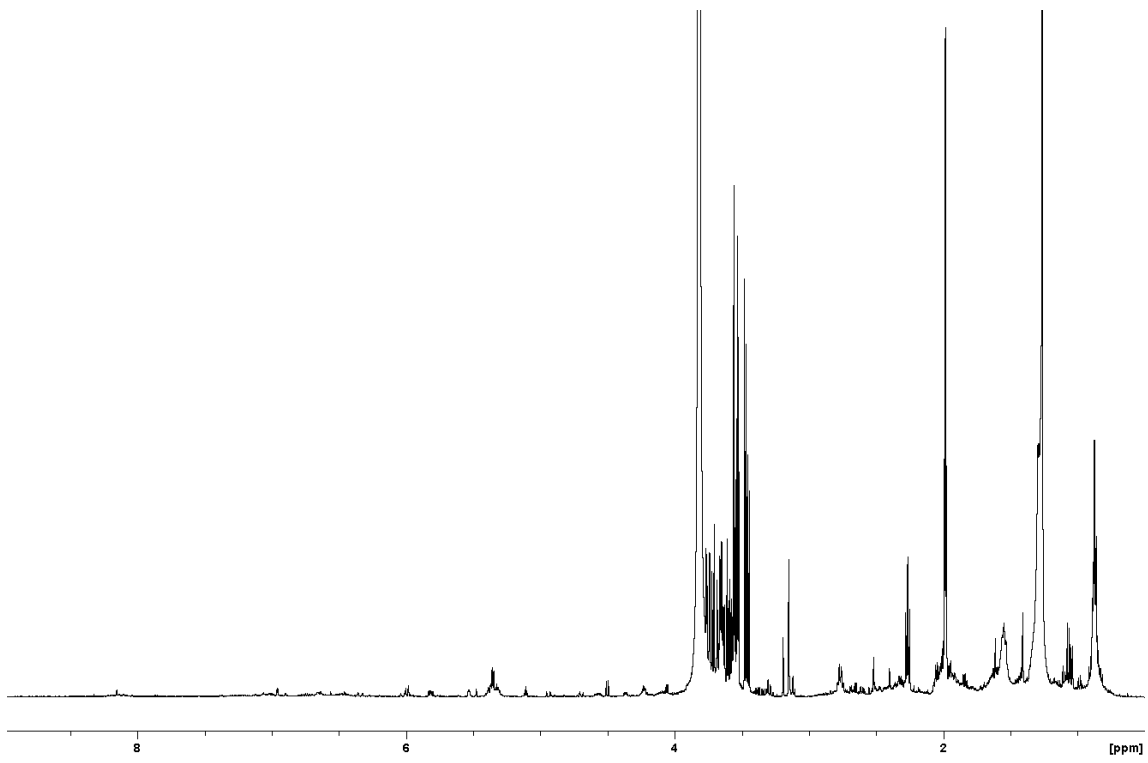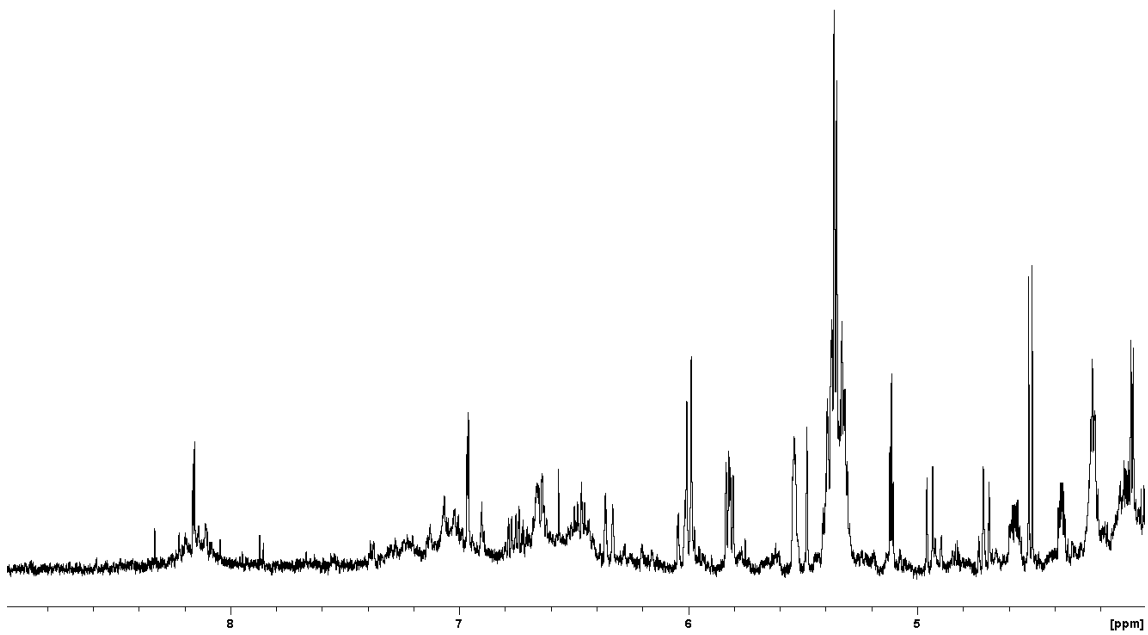

DS 20

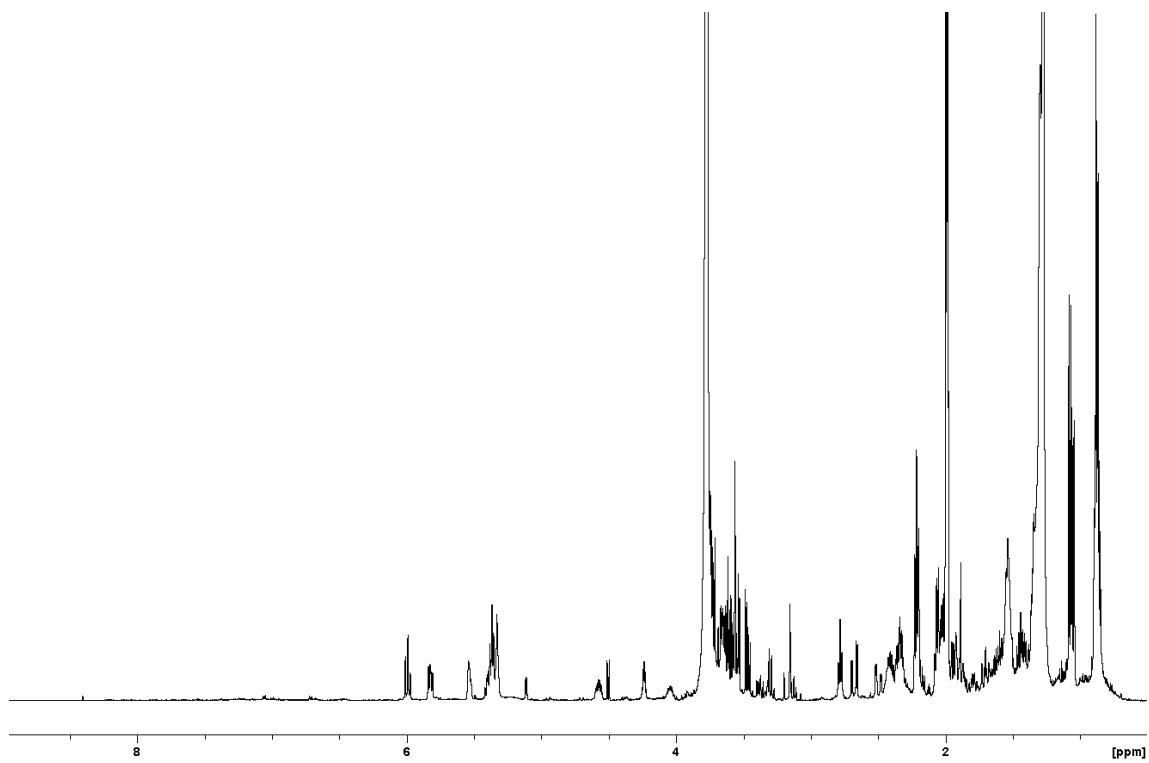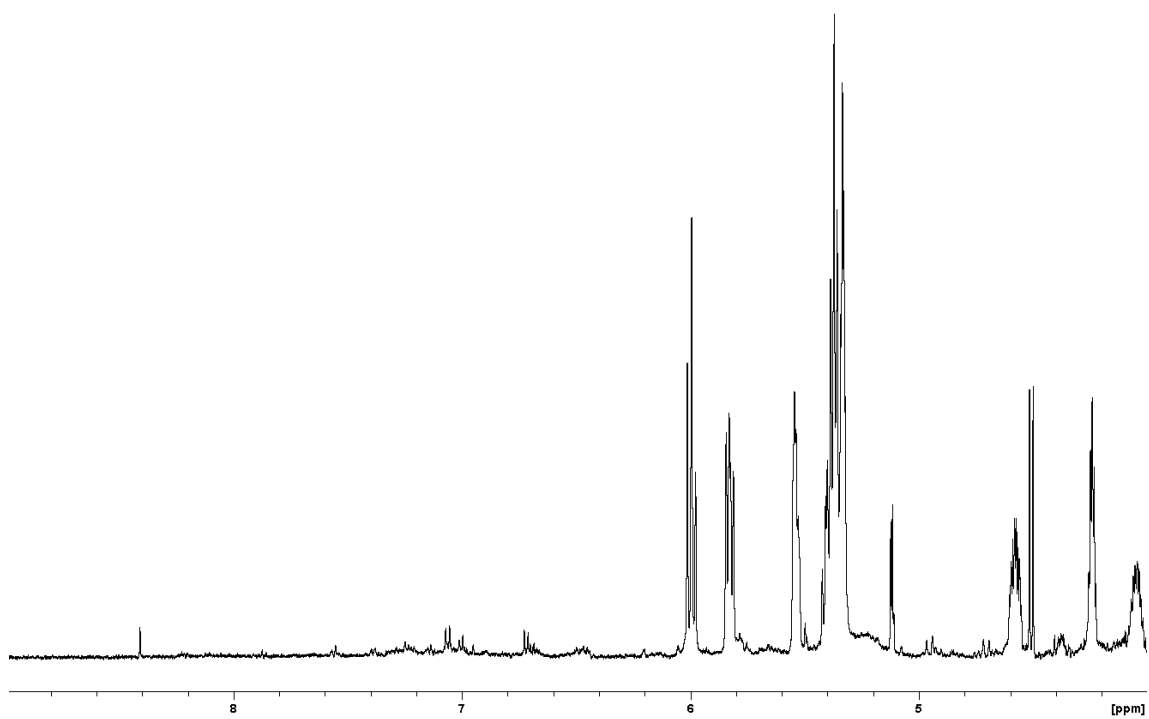

DS 21

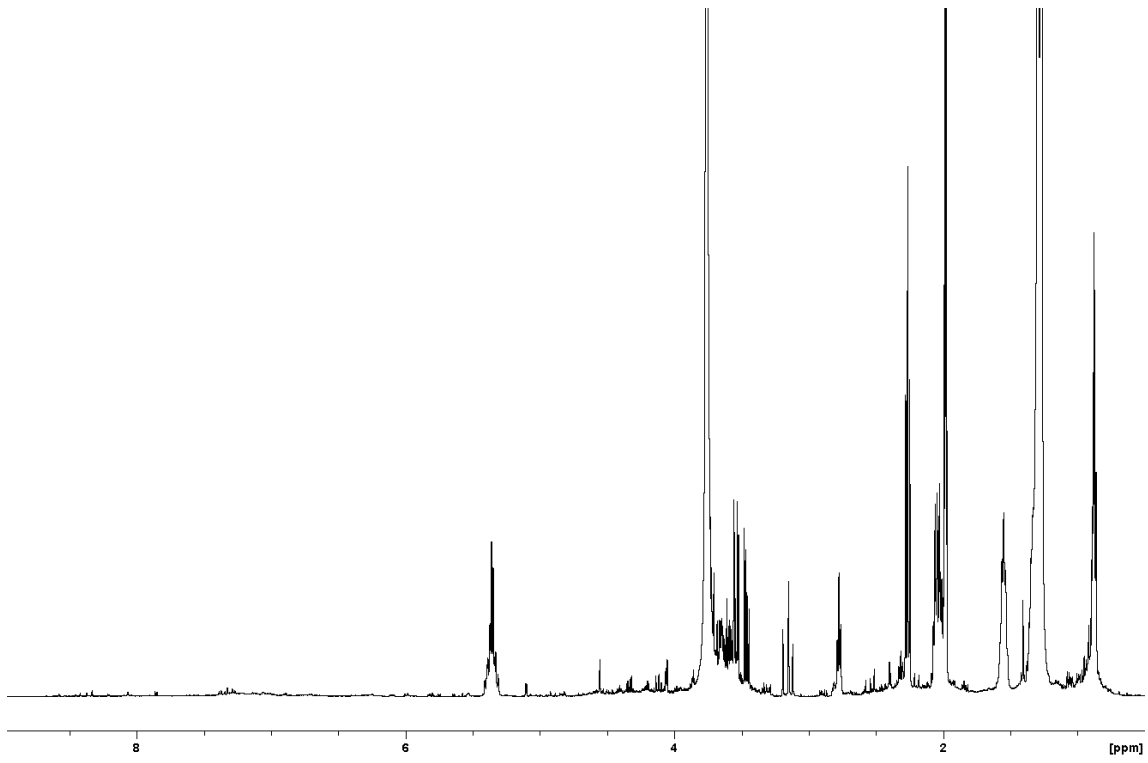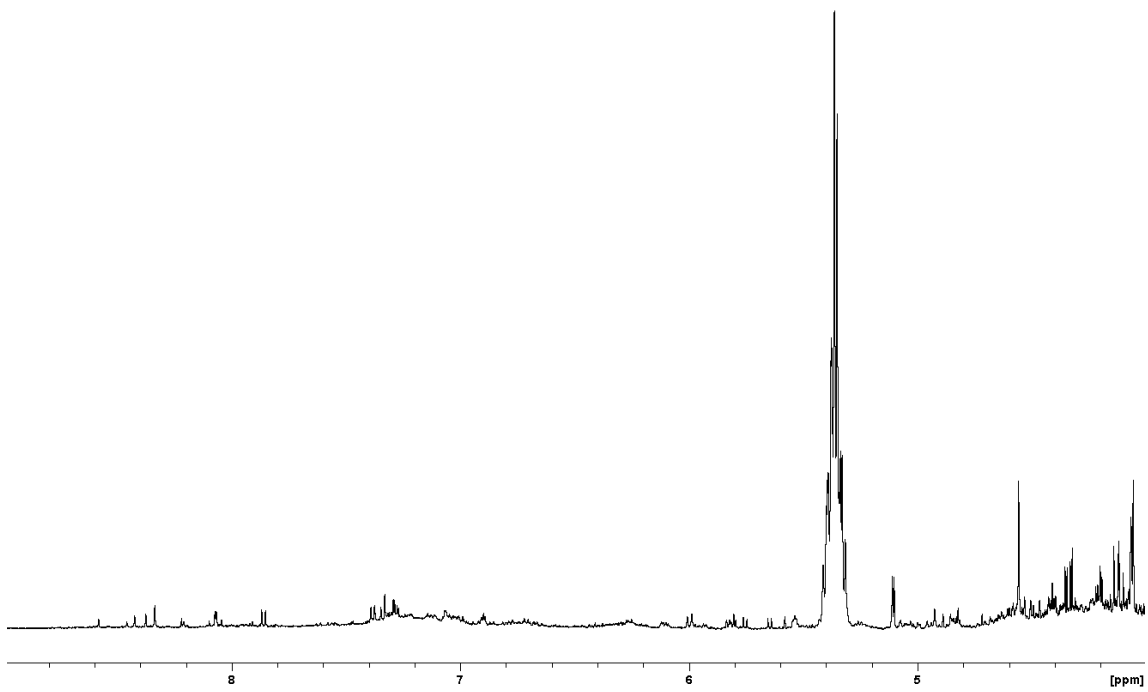

DS 22

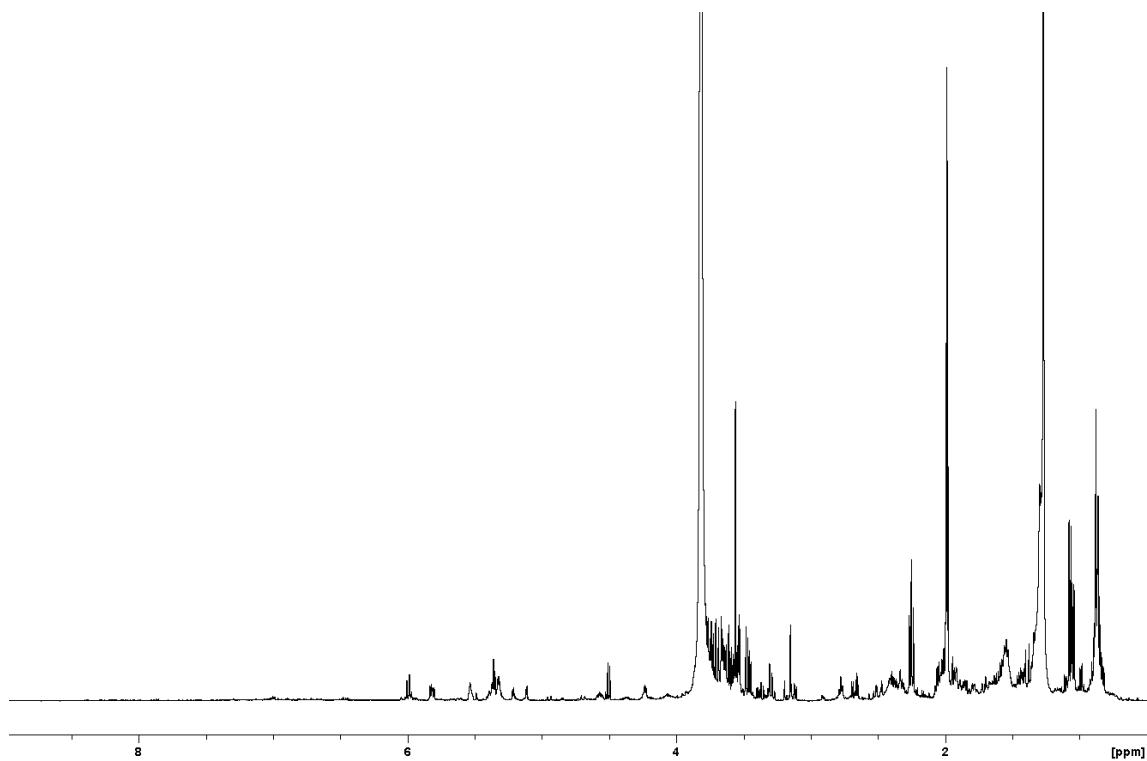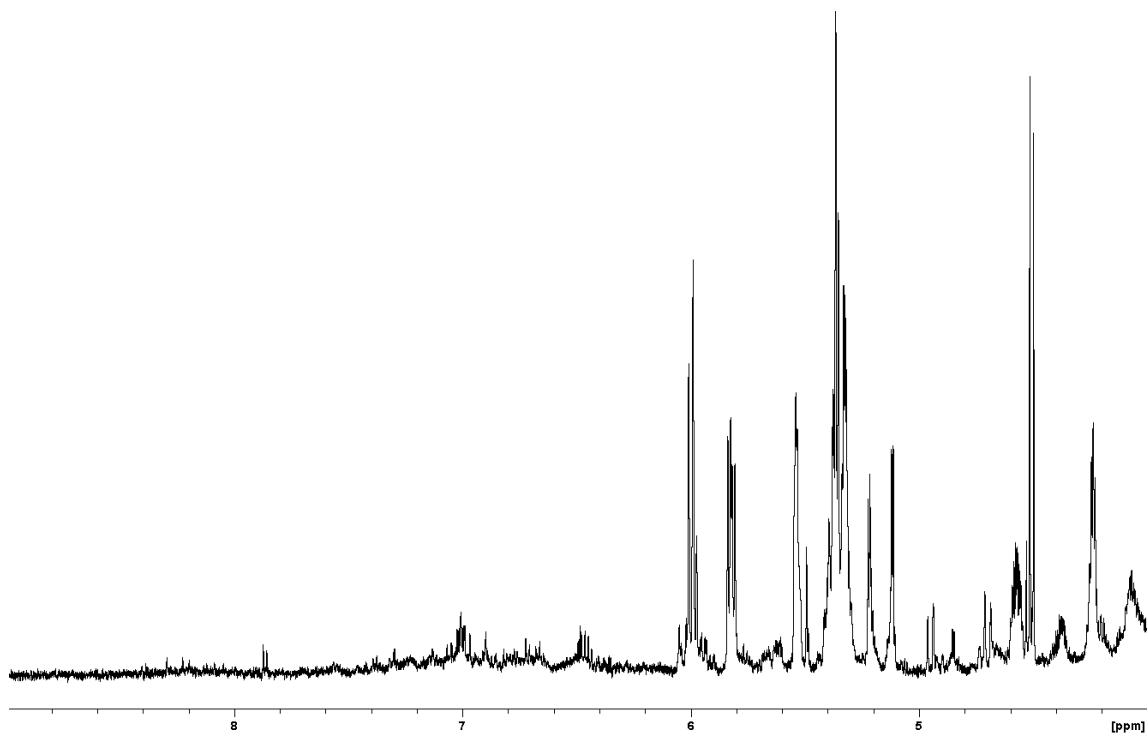

DS 23

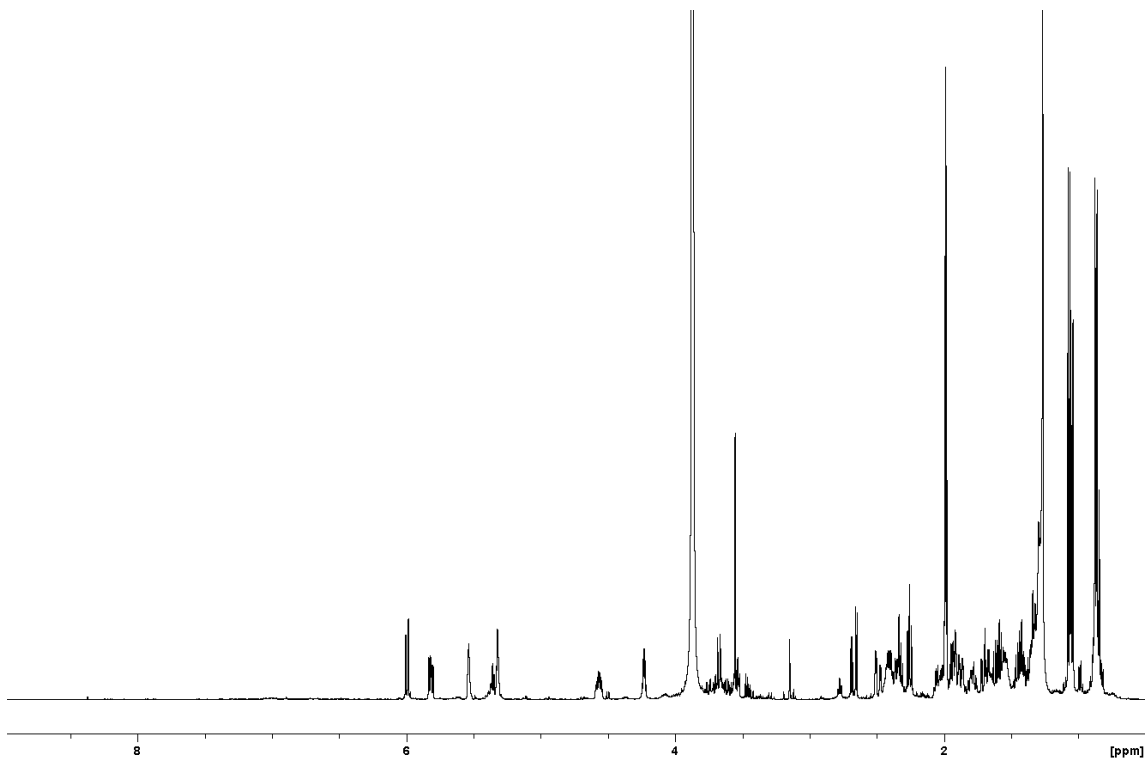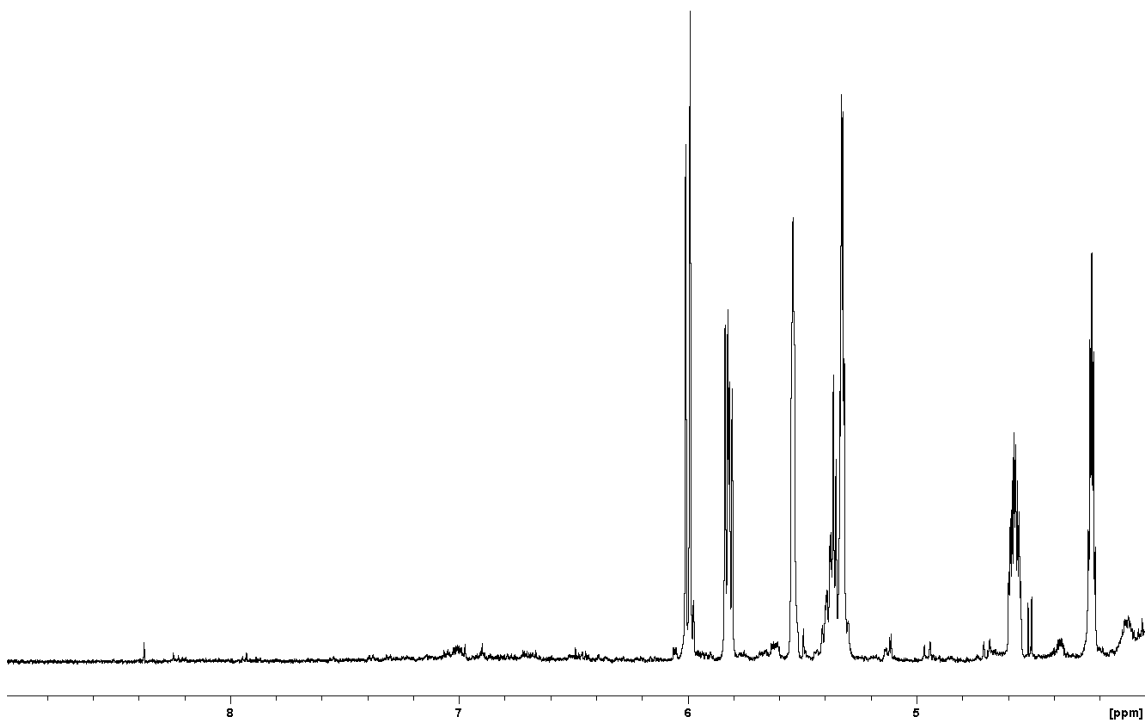



DS 24

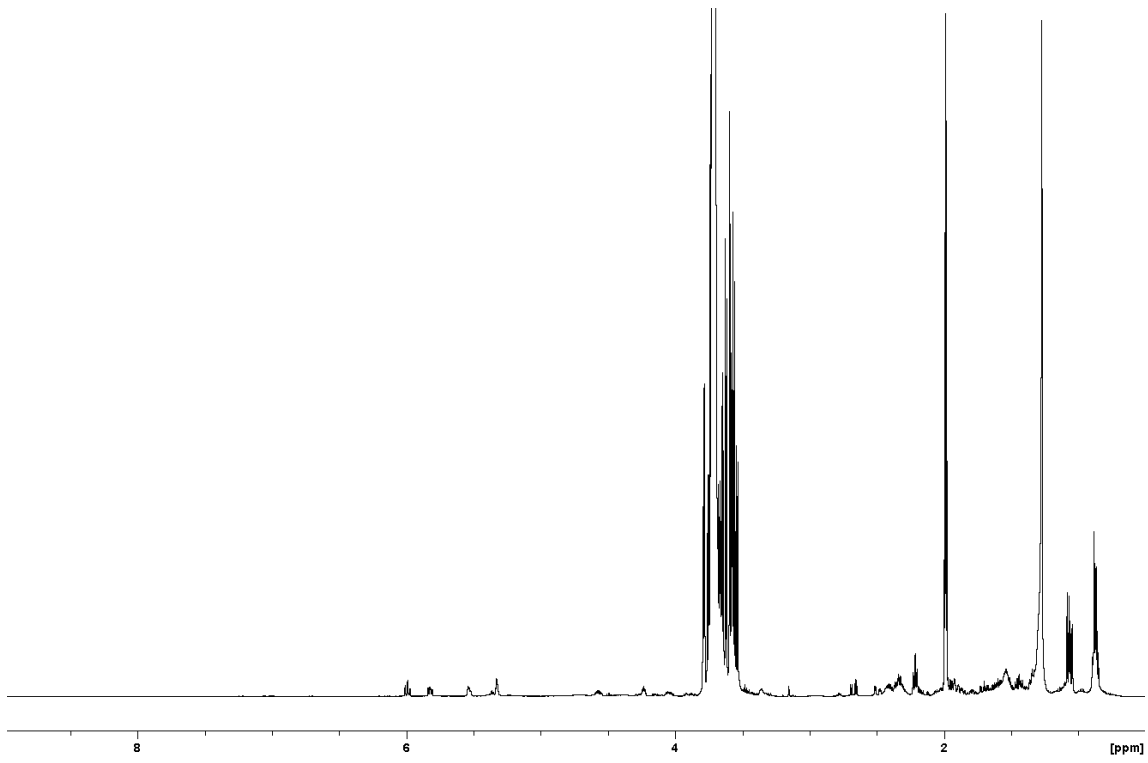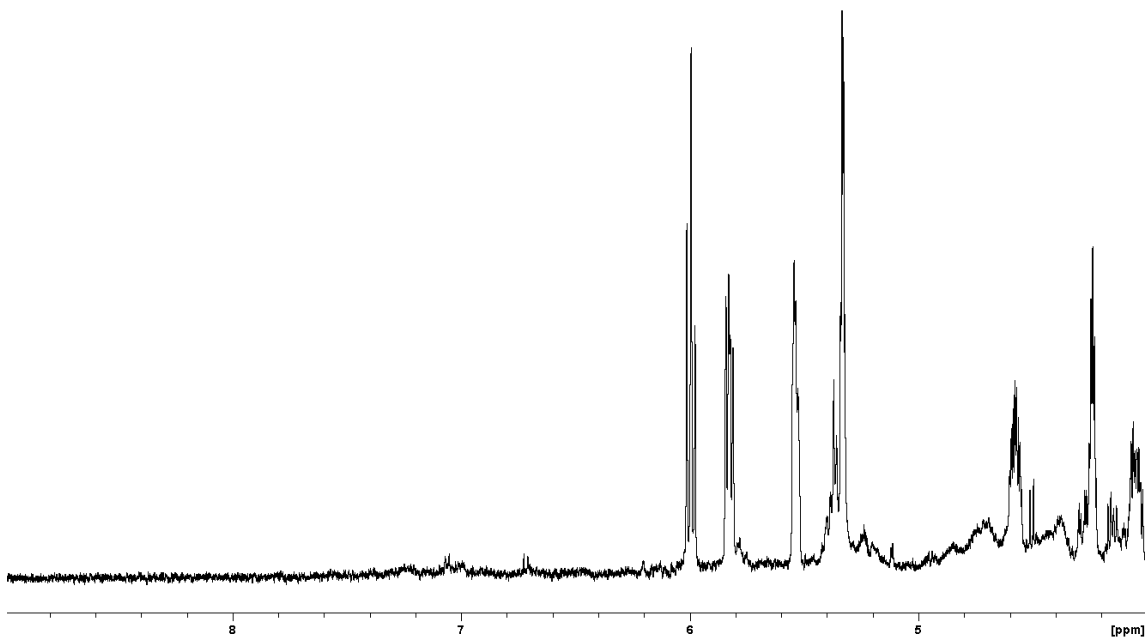

DS 25

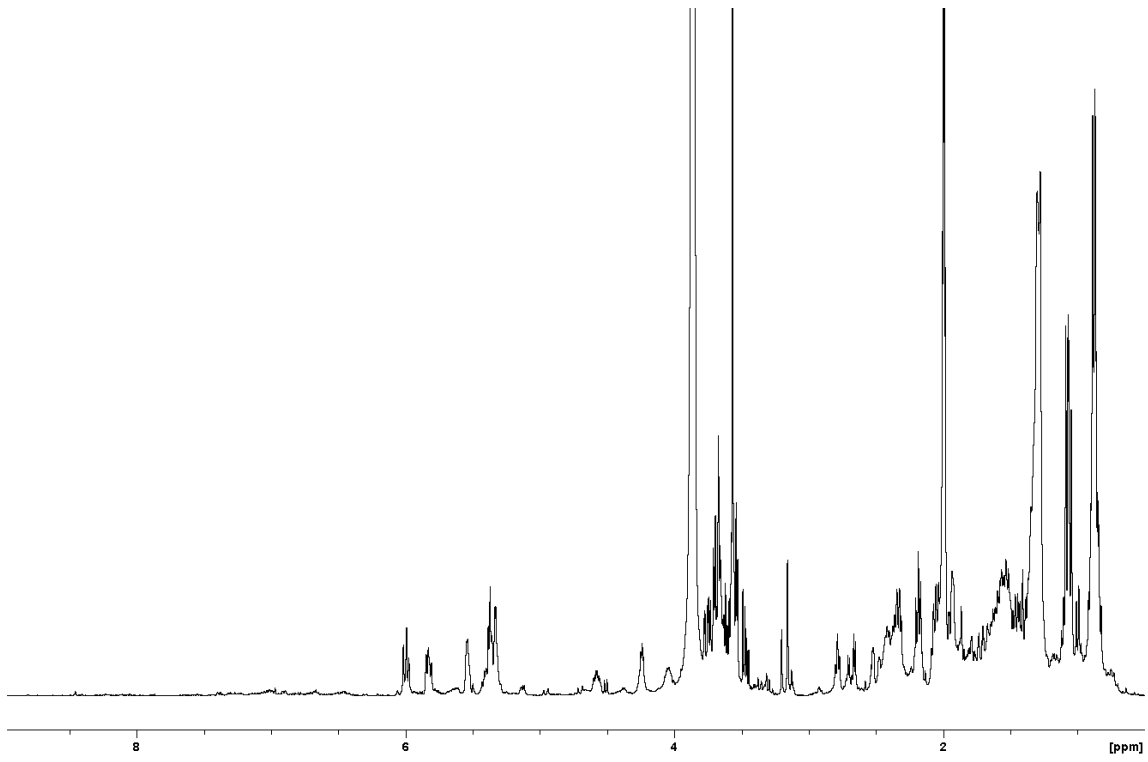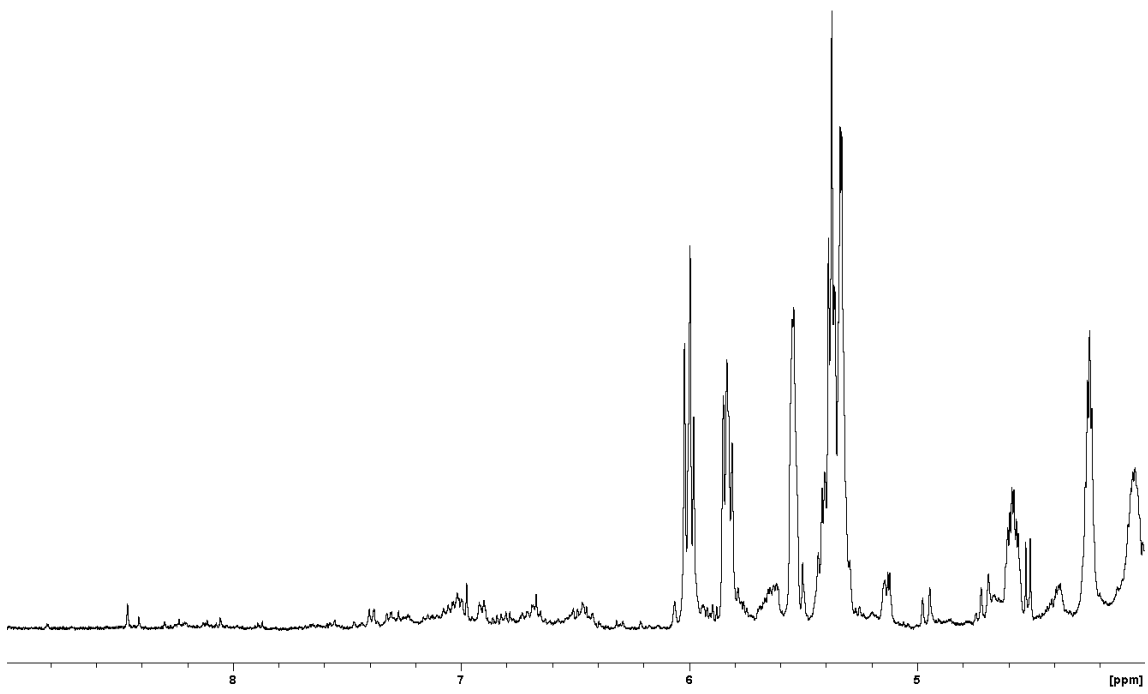

DS 26

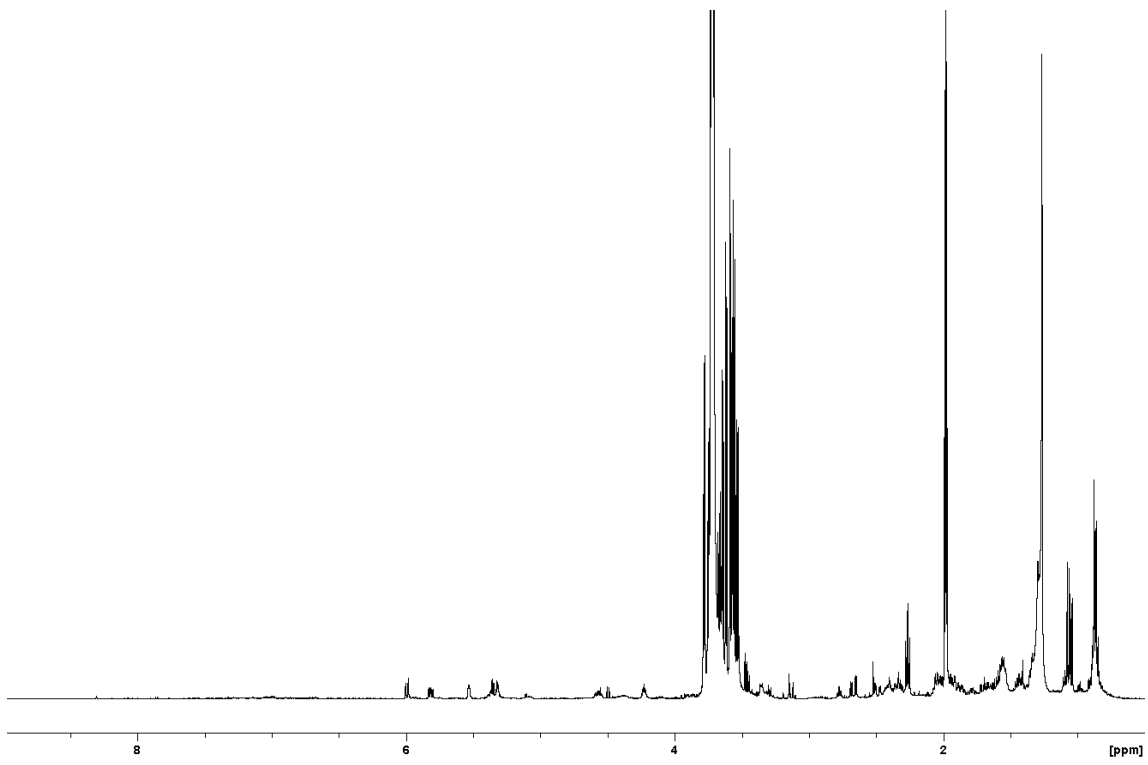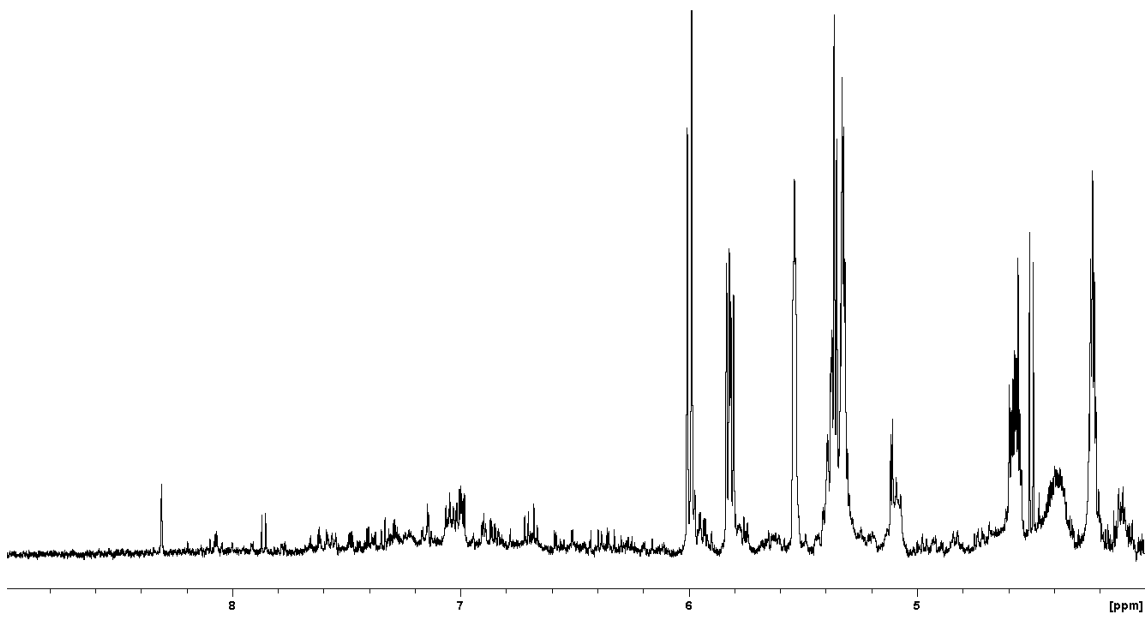

DS 27

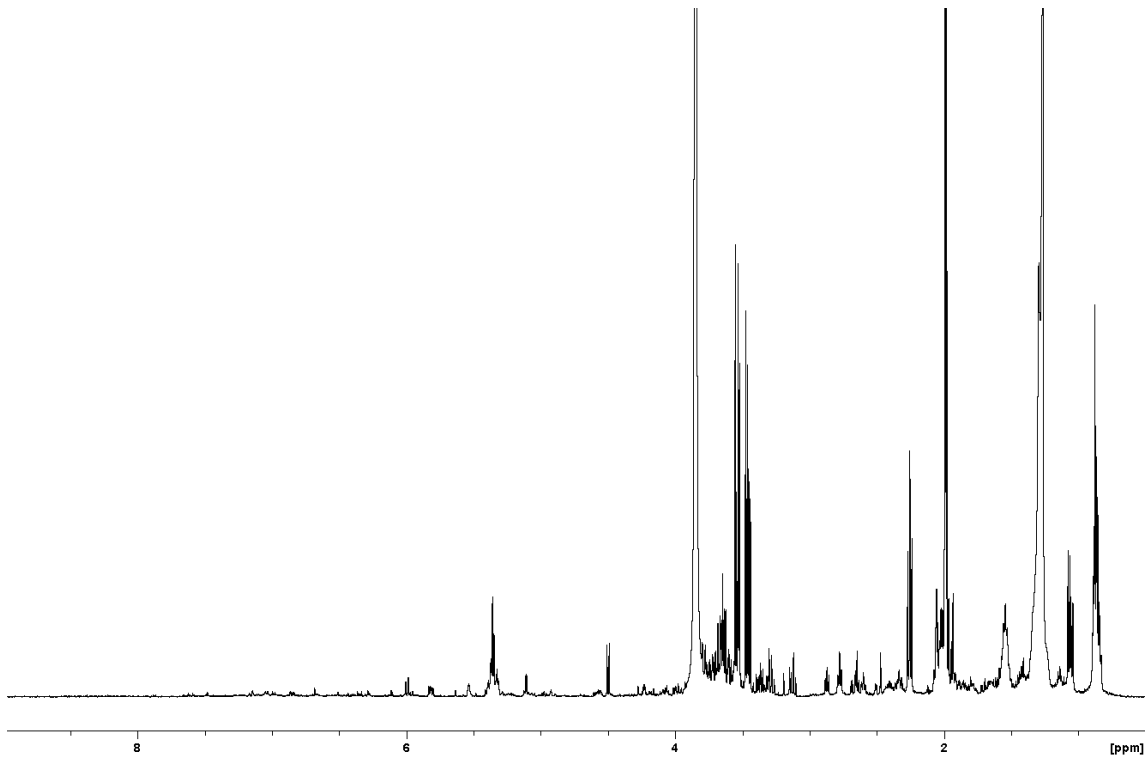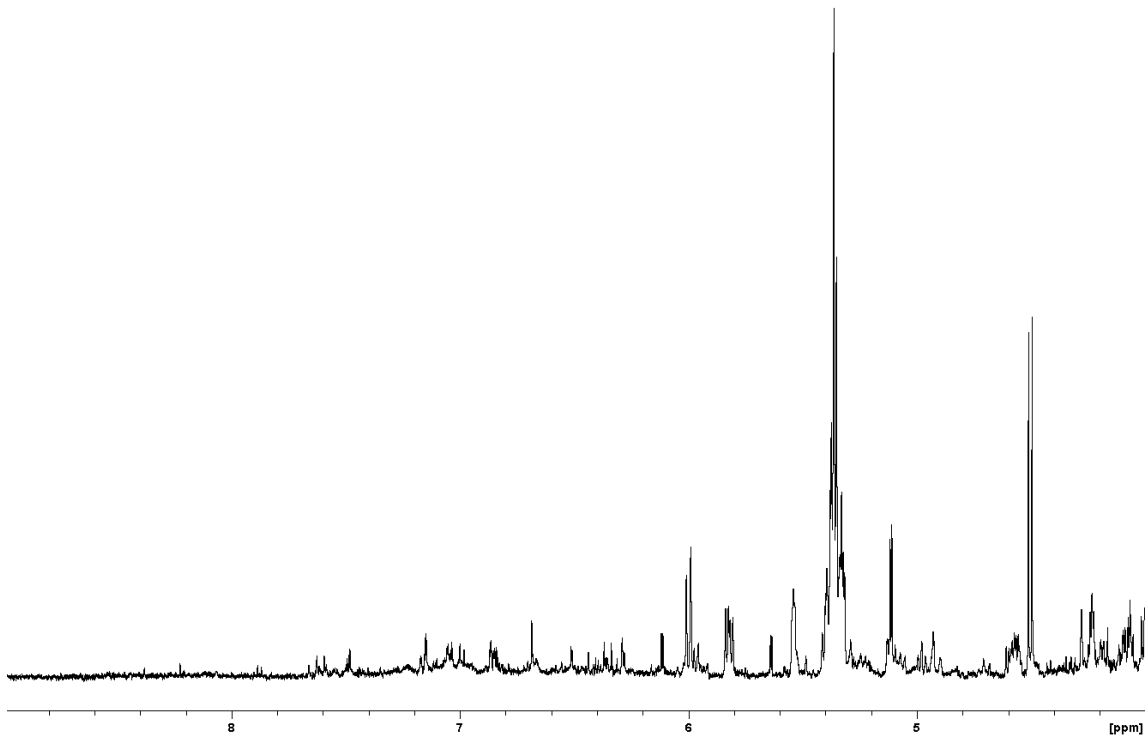

DS 28

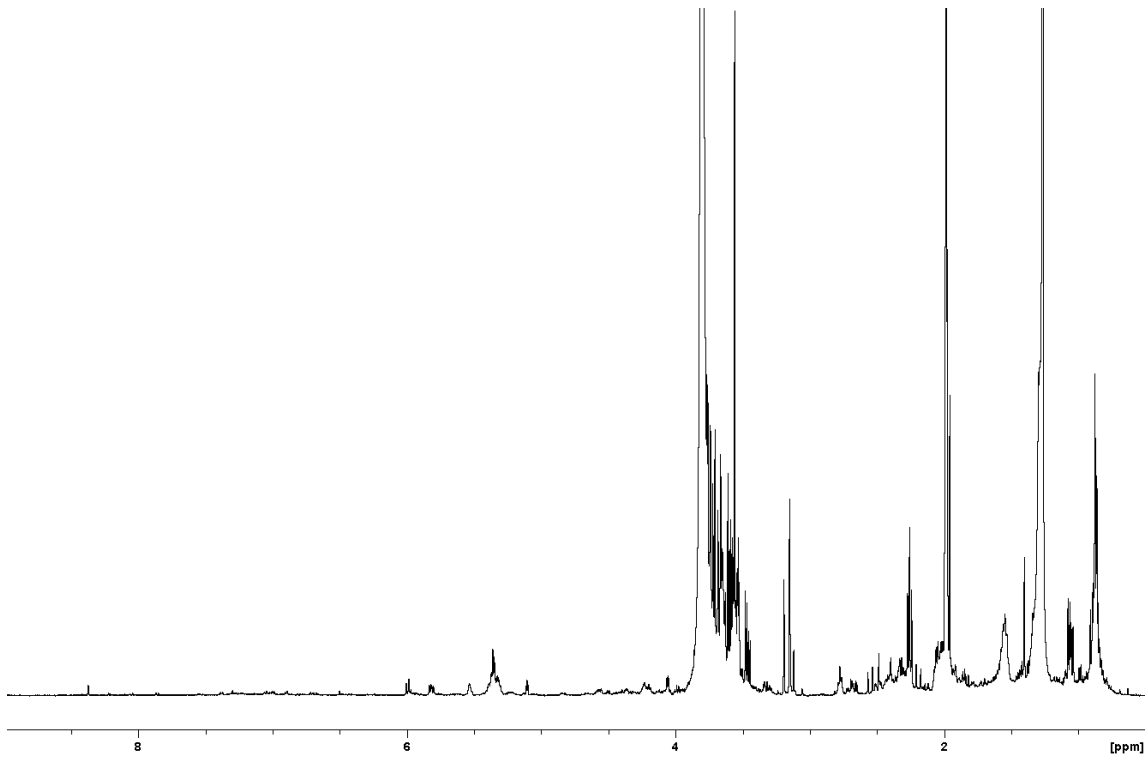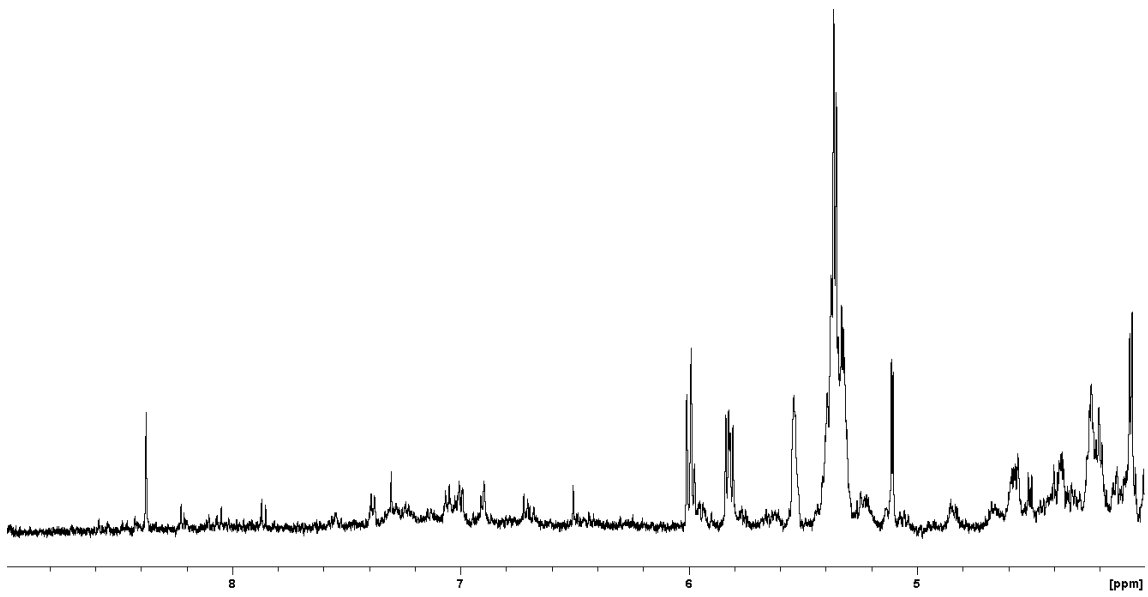

DS 29 No monacolins detected

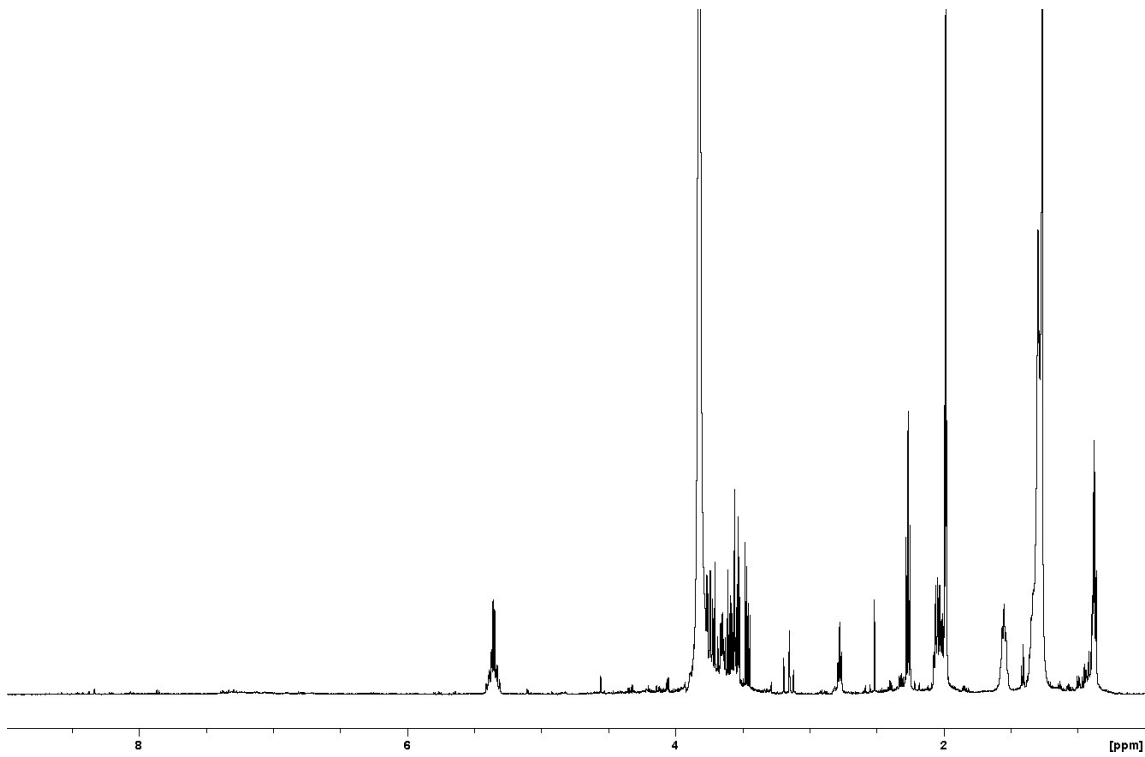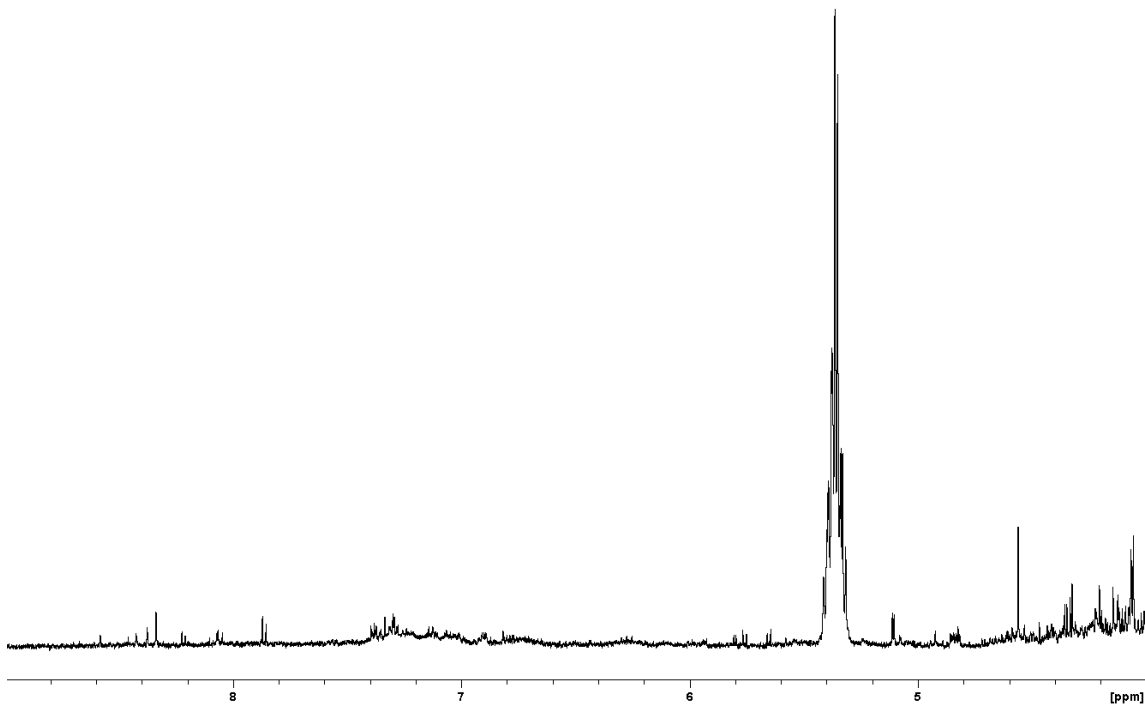

DS 30

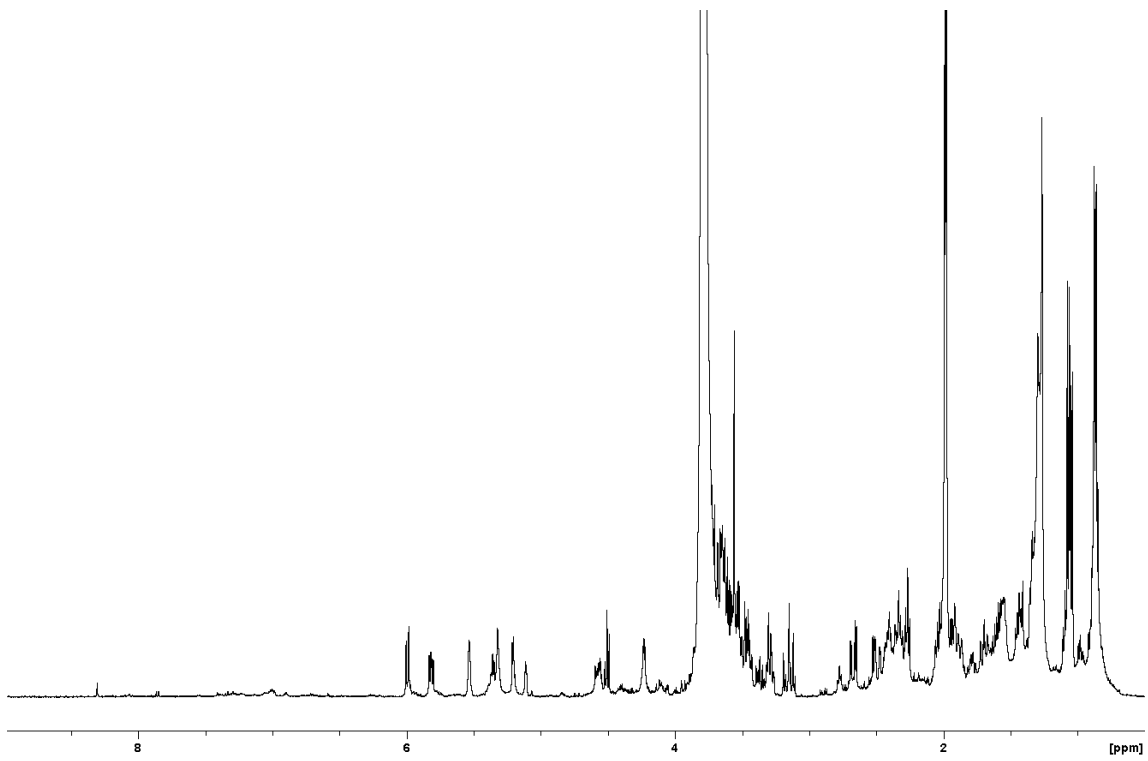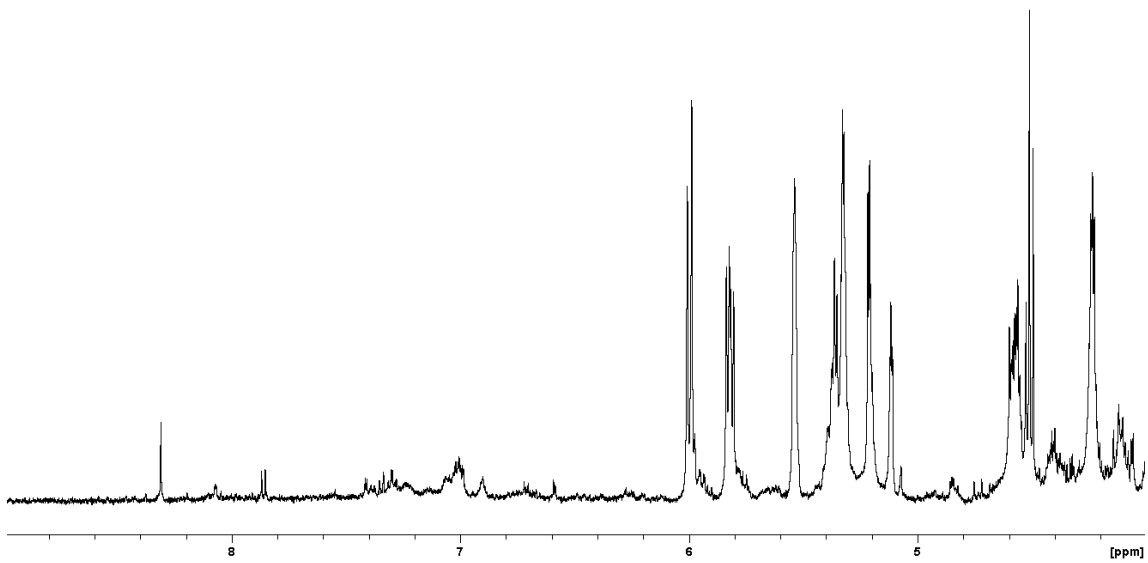

DS 31

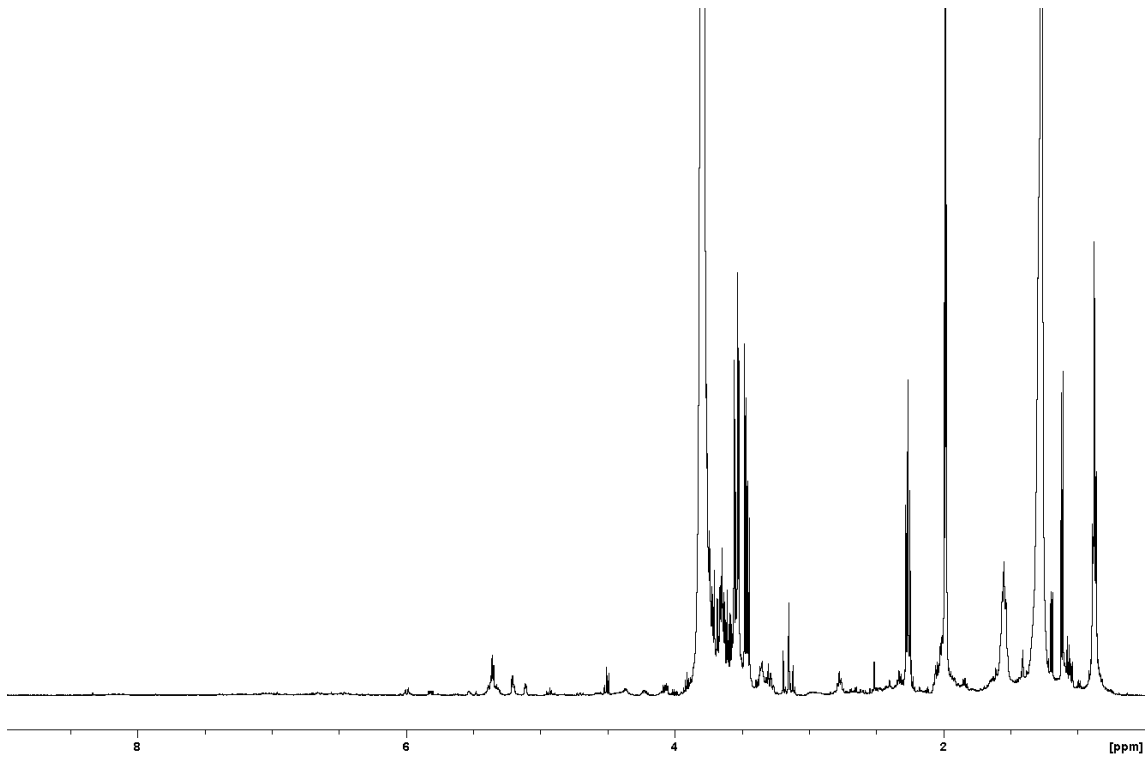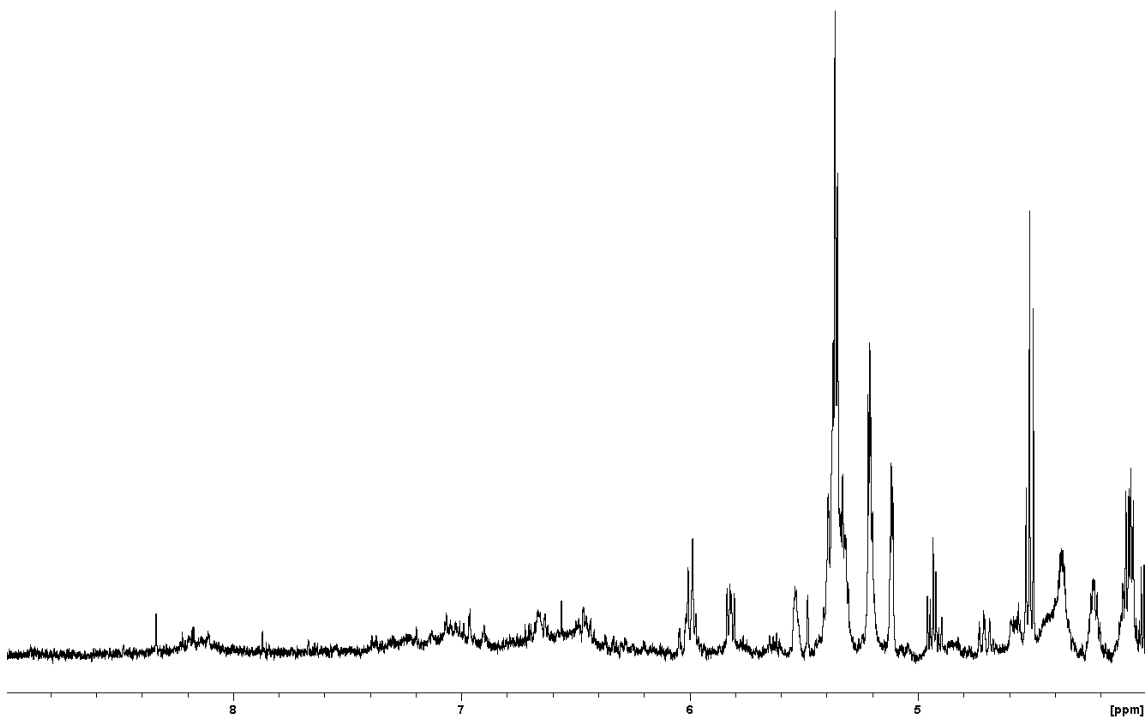



**Figure S2.** UHPLC chromatograms with UV detection at 238 nm (left) and full scan MS profile in positive ESI mode (right) of 9 RYR dietary supplements. MJ, MN, ML, MK: monacolins J, N, L, K; MLA, MKA: monacolins L, K in hydroxyl acid forms; CP: compactin; DiMK: dihydromonacolin K; DeML, DeMK: dehydromonacolins L,K; Cit: citrinin; Mo: monascin; Moco: monascorubramine; Mocusp: monascuspiloin.

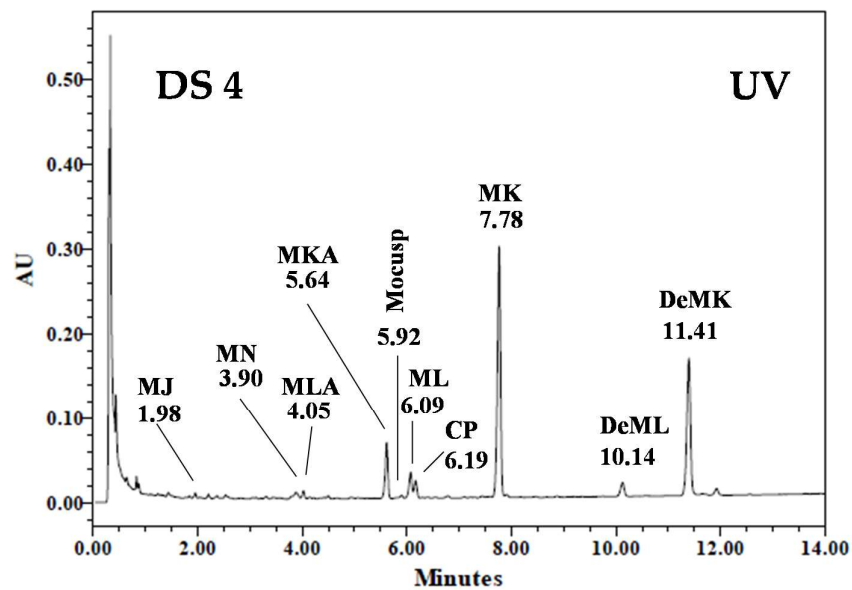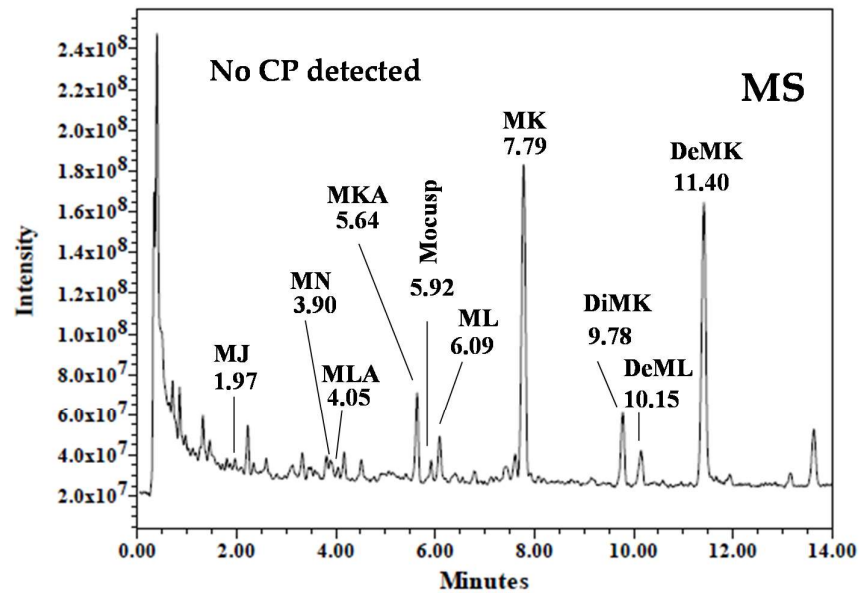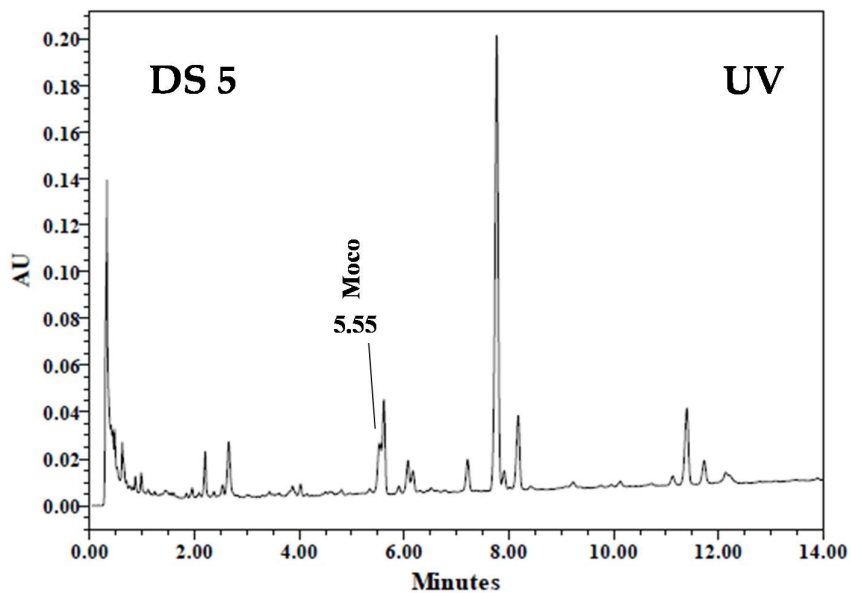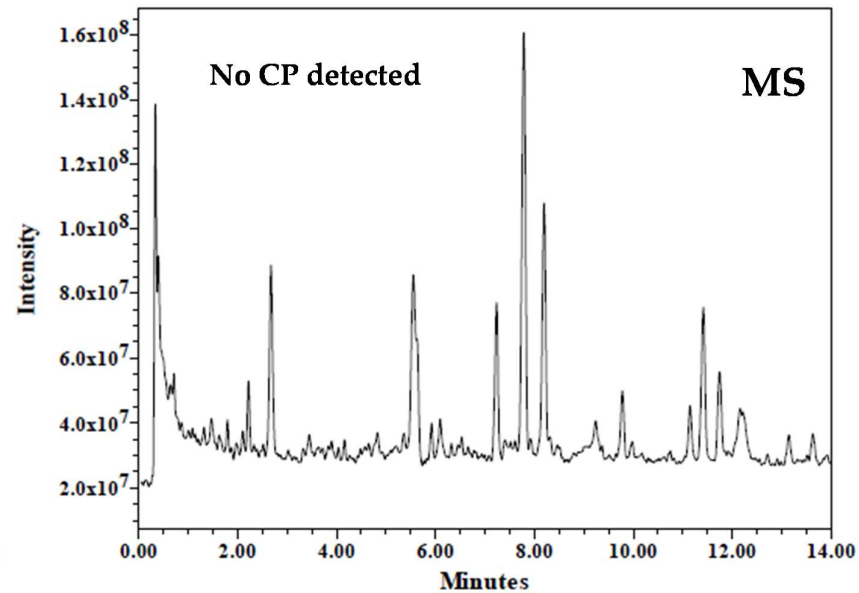

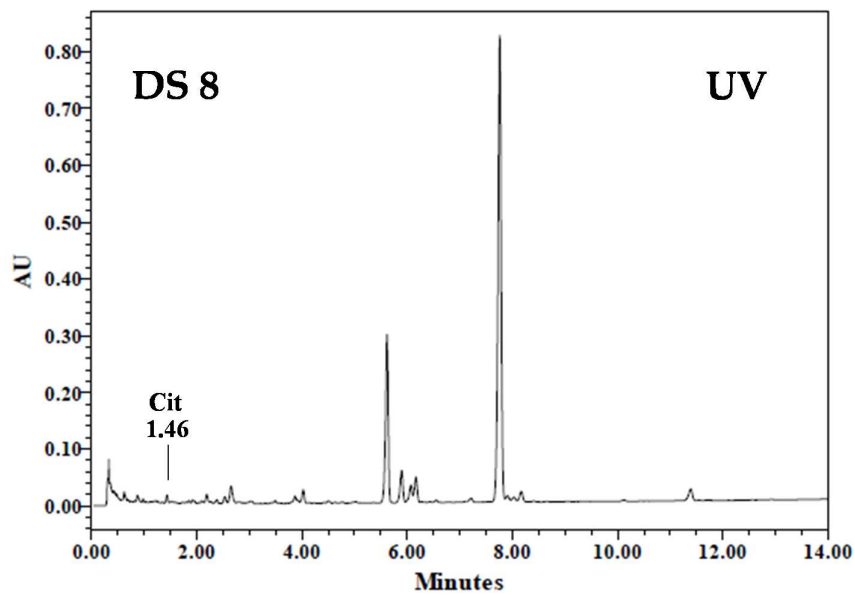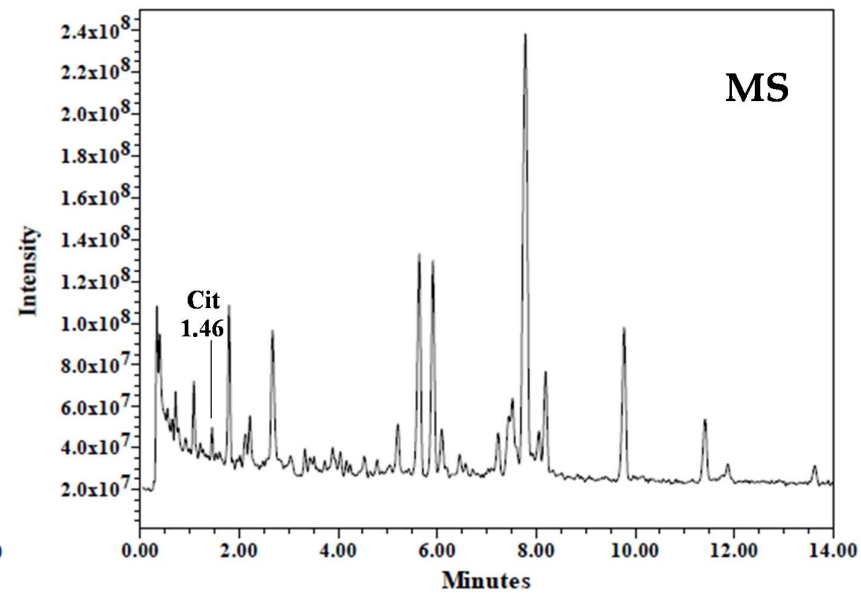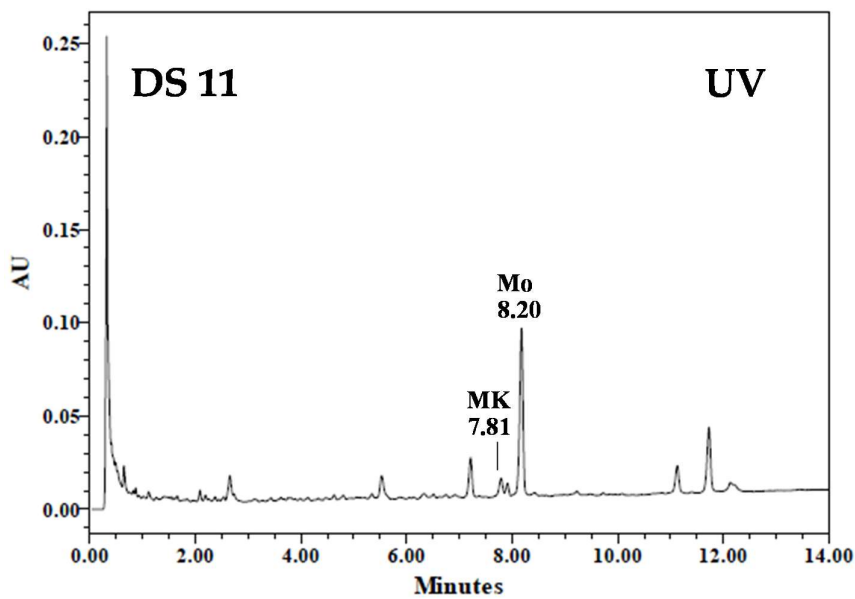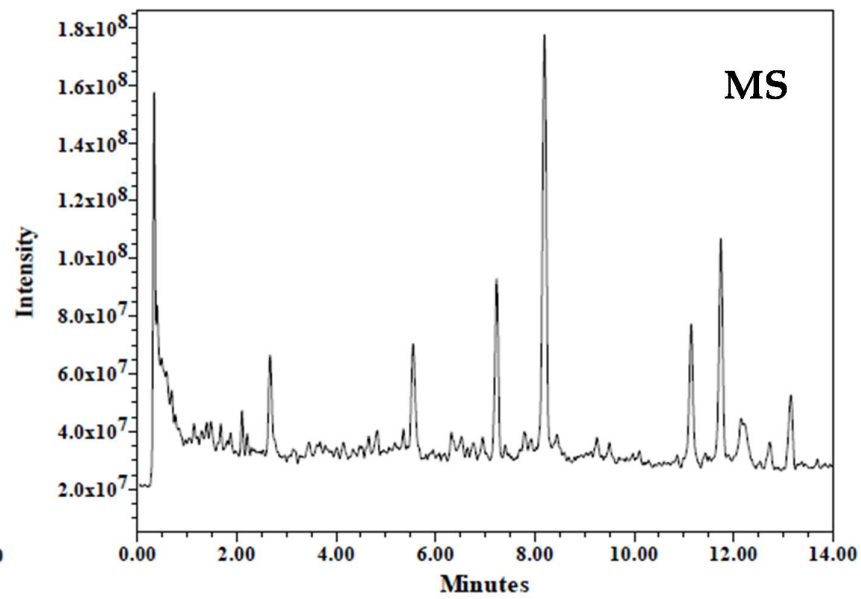

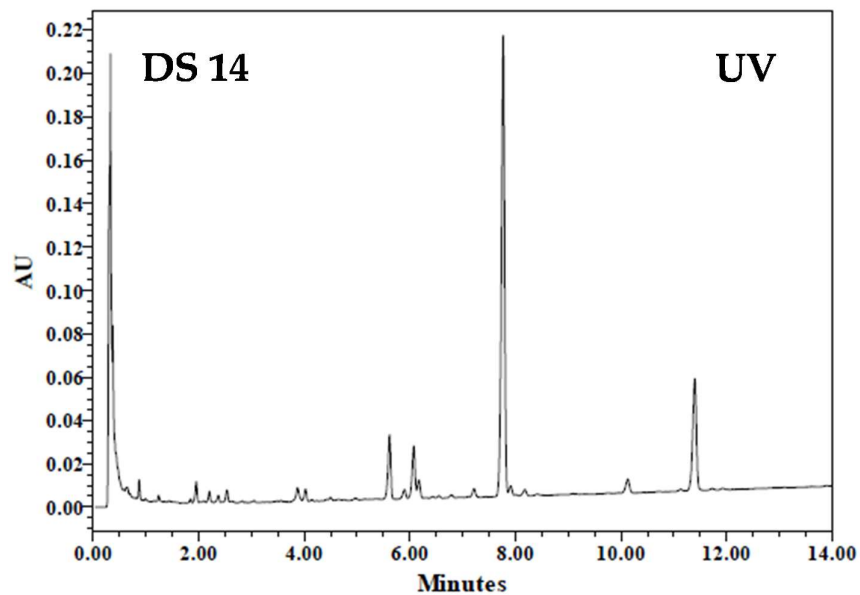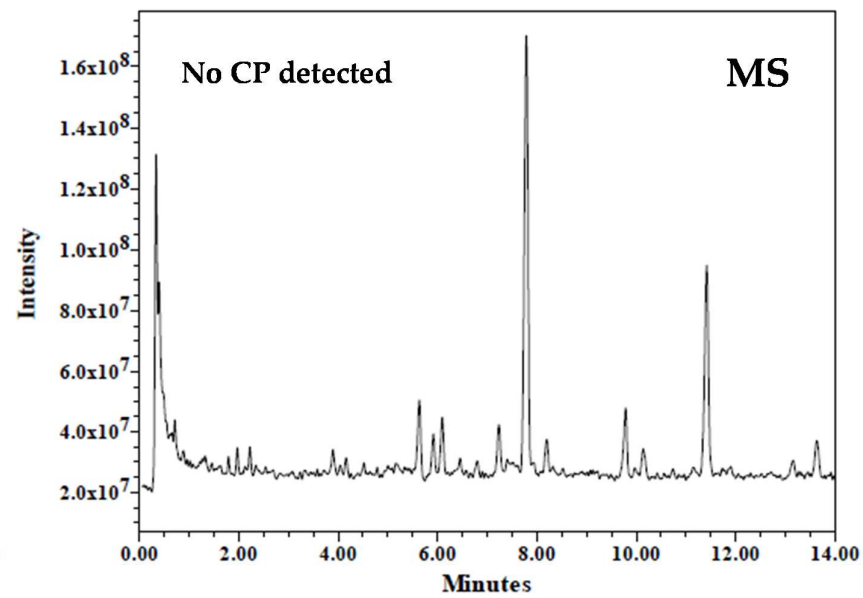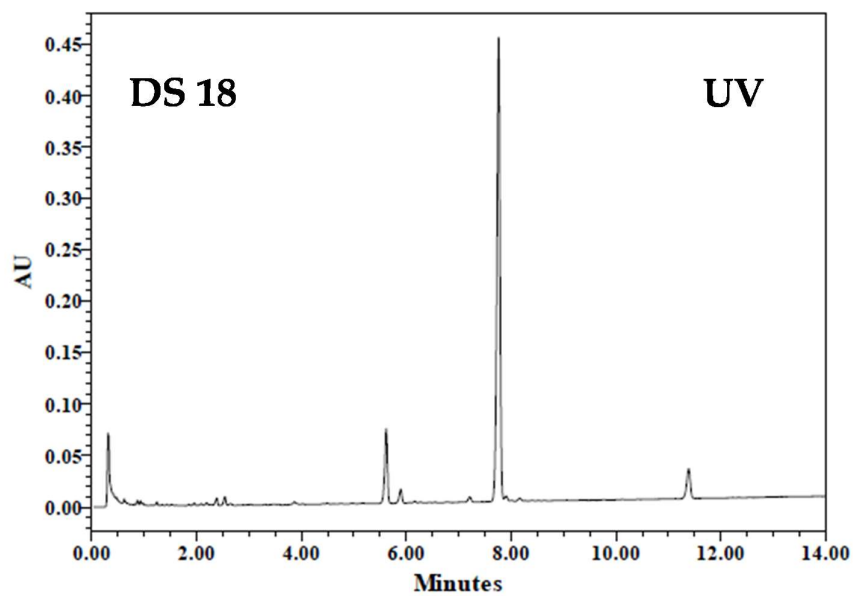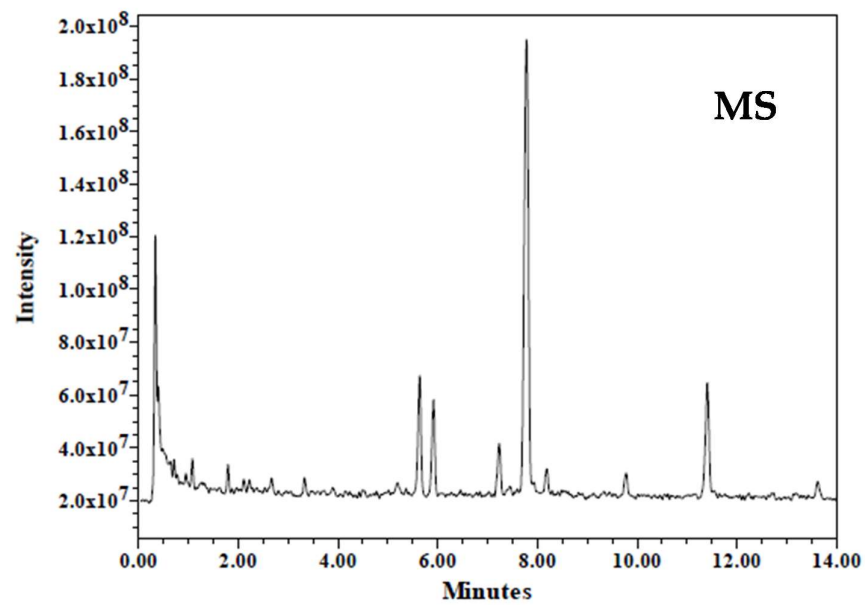

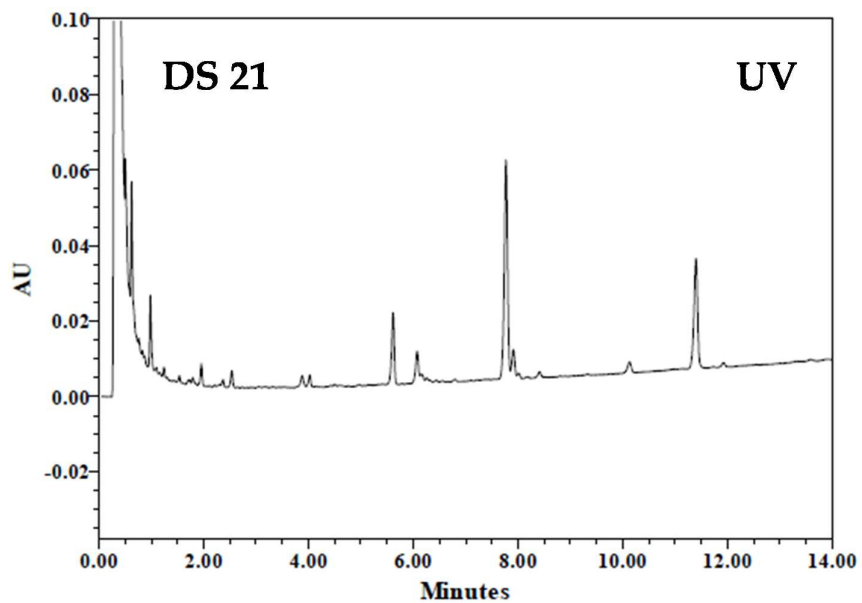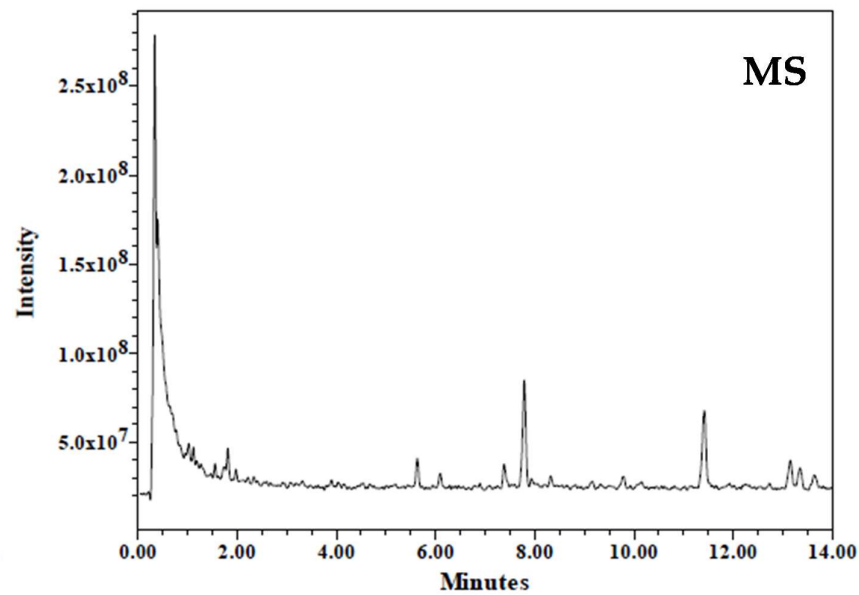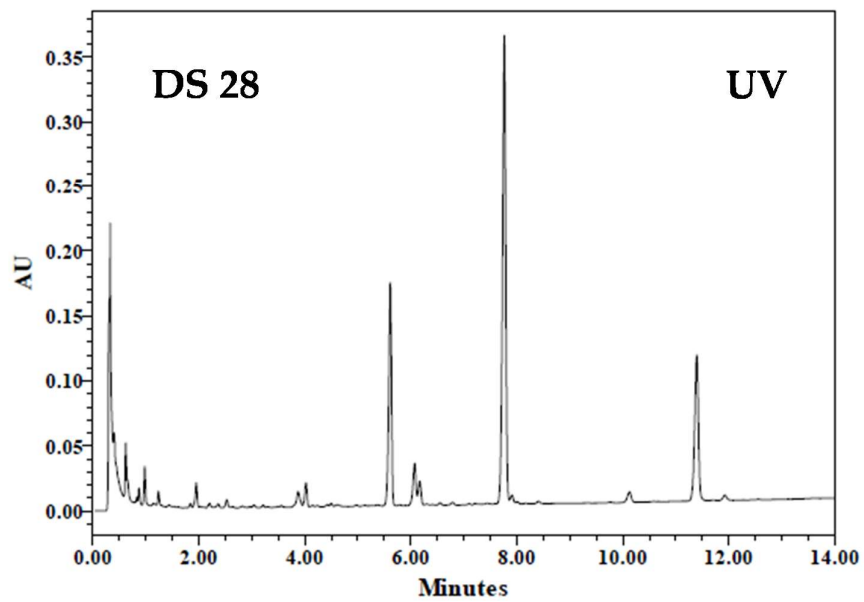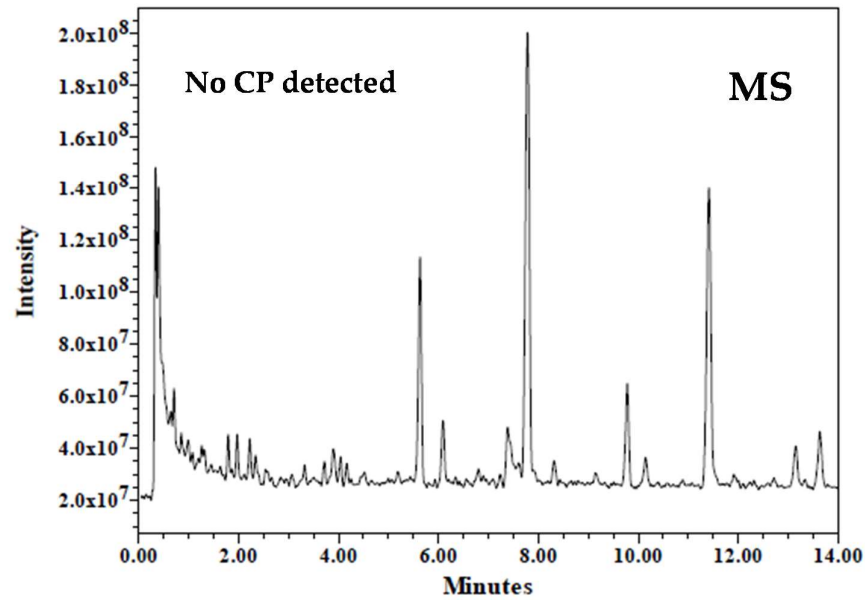

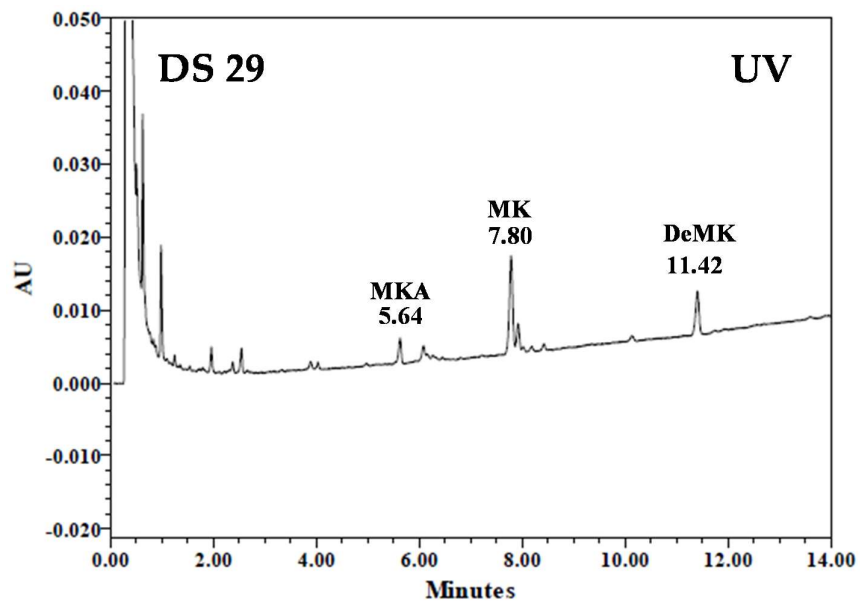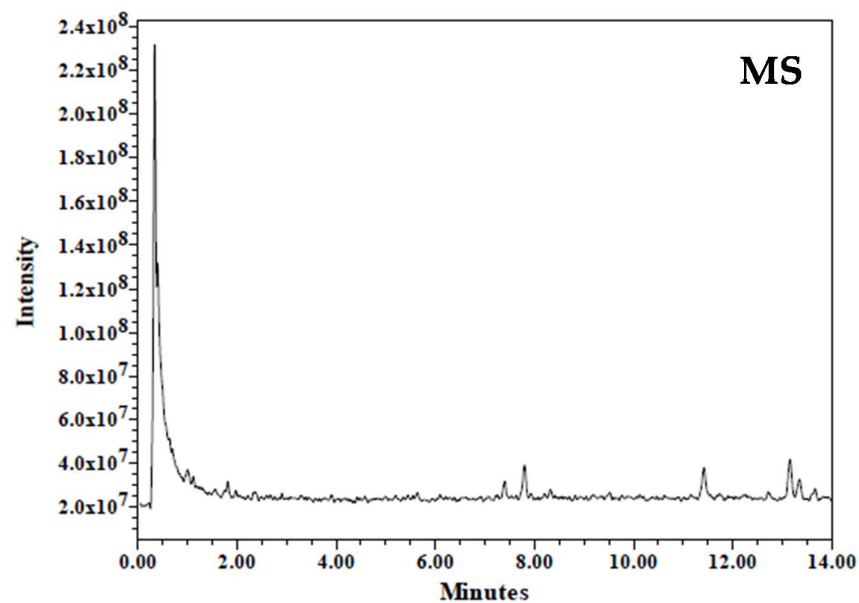

Supplement: molecules-25-00317-s001.pdf [file molecules-25-00317-s001.pdf]
